# Supplementary material for: Chance and necessity in the genome evolution of endosymbiotic bacteria of insects
Source: PubMed Central journal article supplement (PMC5437351; doi:10.1038/ismej.2017.18), 2017-03-21
Supplement: ismej201718x1.pdf [file ismej201718x1.pdf]

|      |        |      |    |
|------|--------|------|----|
| rpsR | 99,000 | rpmG | 99 |
| rpmF | 99,000 | csrA | 99 |
| rplT | 99,000 | rplM | 99 |
| atpE | 99,000 | rplV | 99 |
| rpsU | 99,000 | Gene | 99 |
| flgN | 99,000 | fis  | 99 |
| flhB | 99,000 | rplX | 99 |
| deoB | 99,000 | rpsH | 99 |
| rpmI | 99,000 | rpsE | 99 |
| aroE | 99,000 | infA | 99 |
| gpmA | 99,000 | rpsC | 99 |
| acpP | 99,000 | rplK | 99 |
| ybaB | 99,000 |      |    |
| rpmG | 99,000 |      |    |
| ftsL | 99,000 |      |    |
| csrA | 99,000 |      |    |
| rplM | 99,000 |      |    |
| rplV | 99,000 |      |    |
| serC | 99,000 |      |    |
| Gene | 99,000 |      |    |
| rpmH | 99,000 |      |    |
| rpsH | 99,000 |      |    |
| rpsE | 99,000 |      |    |
| infA | 99,000 |      |    |
| dsbA | 99,000 |      |    |
| filI | 99,000 |      |    |
| cysK | 99,000 |      |    |
| rpsC | 99,000 |      |    |
| rpoA | 99,000 |      |    |
| rpmE | 99,000 |      |    |
| sitA | 99,000 |      |    |
| rplK | 99,000 |      |    |

|      |        |       |        |
|------|--------|-------|--------|
| sucC | 22.656 | rpiA  | 28.928 |
| ftsY | 22.858 | pgm   | 29.086 |
| dksA | 24.840 | tolQ  | 29.991 |
| tolQ | 25.423 | bamD  | 30.185 |
| nuoB | 29.623 | b2619 | 30.258 |
| nuoI | 34.815 | trkA  | 30.644 |
| mraY | 36.254 | glpE  | 31.181 |
| sufA | 39.403 | kdsB  | 35.140 |
| ycjF | 45.057 | ruvC  | 35.806 |
| kdsB | 48.709 | minE  | 39.264 |
| minE | 52.615 | rpsA  | 40.898 |
|      |        | hinT  | 47.981 |
|      |        | guaA  | 48.204 |
|      |        | fmt   | 50.819 |
|      |        | ftsJ  | 54.939 |
|      |        | yhgN  | 57.625 |
|      |        | flhD  | 99.000 |
|      |        | mreB  | 99.000 |
|      |        | trkH  | 99.000 |
|      |        | flr   | 99.000 |
|      |        | dacA  | 99.000 |
|      |        | rplT  | 99.000 |
|      |        | atpE  | 99.000 |
|      |        | flgN  | 99.000 |
|      |        | fliS  | 99.000 |
|      |        | rpmJ  | 99.000 |
|      |        | lolE  | 99.000 |
|      |        | rpmI  | 99.000 |
|      |        | acpP  | 99.000 |
|      |        | rpmG  | 99.000 |
|      |        | rplV  | 99.000 |
|      |        | sdaC  | 99.000 |
|      |        | rpmH  | 99.000 |
|      |        | rpsE  | 99.000 |
|      |        | filI  | 99.000 |
|      |        | rpsC  | 99.000 |
|      |        | rpmE  | 99.000 |
|      |        | ugd   | 99.000 |
|      |        | rpsL  | 99.000 |
|      |        | yccA  | 99.000 |
|      |        | rpoZ  | 99.000 |
|      |        | rplD  | 99.000 |
|      |        | rnhA  | 99.000 |
|      |        | rpsR  | 99.000 |
|      |        | rpmF  | 99.000 |
|      |        | emrE  | 99.000 |
|      |        | rpsU  | 99.000 |
|      |        | flhB  | 99.000 |
|      |        | nadA  | 99.000 |
|      |        | gpmA  | 99.000 |
|      |        | ybaB  | 99.000 |
|      |        | rplM  | 99.000 |
|      |        | serC  | 99.000 |
|      |        | ybiS  | 99.000 |
|      |        | Gene  | 99.000 |
|      |        | rpsH  | 99.000 |
|      |        | crp   | 99.000 |
|      |        | infA  | 99.000 |
|      |        | dsbA  | 99.000 |
|      |        | wecE  | 99.000 |
|      |        | rpoA  | 99.000 |
|      |        | yqeI  | 99.000 |
|      |        | rplK  | 99.000 |
