# Supplementary material for: Chance and necessity in the genome evolution of endosymbiotic bacteria of insects
Source: PubMed Central journal article supplement (PMC5437351; doi:10.1038/ismej.2017.18), 2017-03-21
Supplement: ismej201718x2.pdf [file ismej201718x2.pdf]

Table S2. Mutational spectrum of *Escherichia coli* evolving populations under genetic drift.

| kind | position   | mutation                   | annotation               | gene        | locus       | description                                                                                                                                                                                           |
|------|------------|----------------------------|--------------------------|-------------|-------------|-------------------------------------------------------------------------------------------------------------------------------------------------------------------------------------------------------|
| DEL  | 330        | 330bp                      | intergenic (-) hcr       | hcrA        | 0002/b0002  | hcr operon leader peptide/fused aspartokinase I and homoserine dehydrogenase I                                                                                                                        |
| SNP  | 22796 G_A  | G1365(GGT_1he5             | G1365(GGT_1he5           | 00026       | 00026       | isoacyl tRNA synthetase                                                                                                                                                                               |
| SNP  | 33671 G_A  | G952(GDGC_carB             | G952(GDGC_carB           | 00033       | 00033       | carbamoyl phosphate synthase large subunit                                                                                                                                                            |
| DEL  | 3412       | 13bp                       | intergenic (-) carK/carI | carK/carI   | 00033/b0033 | carbamoyl phosphate synthase large subunit/DNA-binding transcriptional activator                                                                                                                      |
| SNP  | 41251 A_G  | H277(HCAT_caiT             | H277(HCAT_caiT           | 00040       | 00040       | predicted transporter                                                                                                                                                                                 |
| SNP  | 47130 A_G  | M442(VATG_yaaU             | M442(VATG_yaaU           | 00045       | 00045       | predicted transporter                                                                                                                                                                                 |
| SNP  | 49456 G_G  | M633(AAC_1heC              | M633(AAC_1heC            | 00047       | 00047       | potassium proton antiporter                                                                                                                                                                           |
| SNP  | 5181 A_G   | T199(TGCA_sdhB             | T199(TGCA_sdhB           | 00051       | 00051       | IES-RNA dimethylallyltransferase, SAM-dependent                                                                                                                                                       |
| SNP  | 54597 C_T  | V361(GGT_AT_sua            | V361(GGT_AT_sua          | 00053       | 00053       | peptidyl-prolyl cis-trans isomerase (PPIase)                                                                                                                                                          |
| SNP  | 56877 T_T  | G782(GGT_C1pD              | G782(GGT_C1pD            | 00054       | 00054       | LPS assembly OM complex LptDE, beta-barrel component                                                                                                                                                  |
| SNP  | 60621 G_A  | R179(GGT_1shP              | R179(GGT_1shP            | 00055       | 00055       | fused thiamin transporter subunits of ABC superfamily; membrane components                                                                                                                            |
| SNP  | 69622 C_T  | L681(CTG_CT1hP             | L681(CTG_CT1hP           | 00067       | 00067       | fused thiamin transporter subunits of ABC superfamily; membrane components                                                                                                                            |
| SNP  | 70218 A_G  | L2351(TTG_C1hB             | L2351(TTG_C1hB           | 00068       | 00068       | thiamin transporter subunit                                                                                                                                                                           |
| SNP  | 97061 C_C  | G465(GGT_murC              | G465(GGT_murC            | 00091       | 00091       | UDP-N-acetylmuramate-L-alanine ligase                                                                                                                                                                 |
| SNP  | 115546 A_G | Y208(TAT_TampE             | Y208(TAT_TampE           | 00111       | 00111       | predicted inner membrane protein                                                                                                                                                                      |
| SNP  | 121896 G_A | A1871(GCT_aceF             | A1871(GCT_aceF           | 00115       | 00115       | pyruvate dehydrogenase, dihydrolipoyltransacylase component E2                                                                                                                                        |
| SNP  | 124735 A_G | D394(GAC_lpd               | D394(GAC_lpd             | 00116       | 00116       | liponamide dehydrogenase, E3 component is part of three enzyme complexes                                                                                                                              |
| SNP  | 129203 A_G | F700(GAA_sdhB              | F700(GAA_sdhB            | 00118       | 00118       | bifunctional aconitate hydratase 2/2-methylsuccinate dehydratase                                                                                                                                      |
| SNP  | 129595 G_A | AB311(GCG_sdhB             | AB311(GCG_sdhB           | 00118       | 00118       | bifunctional aconitate hydratase 2/2-methylsuccinate dehydratase                                                                                                                                      |
| SNP  | 134429 T_T | intergenic (-) cueO/gcd    | cueO/gcd                 | 00123/b0124 | 00123/b0124 | multicopper oxidase (laccase)/glucose dehydrogenase                                                                                                                                                   |
| SNP  | 135262 C_T | S338(WGC_1he               | S338(WGC_1he             | 00124       | 00124       | glucose dehydrogenase                                                                                                                                                                                 |
| SNP  | 144358 C_T | V9V(GTG_G1panC             | V9V(GTG_G1panC           | 00133       | 00133       | panthothenate synthetase                                                                                                                                                                              |
| SNP  | 163295 C_G | P57A(CCT_G1fluA            | P57A(CCT_G1fluA          | 00150       | 00150       | ferriochrome outer membrane transporter                                                                                                                                                               |
| SNP  | 170068 G_A | A153(WGC_1hemL             | A153(WGC_1hemL           | 00154       | 00154       | glutamate 1-semialdehyde aminotransferase (aminomutase)                                                                                                                                               |
| SNP  | 174551 C_T | G780(GGC_C1m               | G780(GGC_C1m             | 00159       | 00159       | 5'-methylthioadenosine/S-adenosylhomocysteine nucleosidase                                                                                                                                            |
| SNP  | 181933 C_T | Q278(QCAG_glnD             | Q278(QCAG_glnD           | 00167       | 00167       | uridylyltransferase                                                                                                                                                                                   |
| SNP  | 183623 C_T | G244(GGC_glnD              | G244(GGC_glnD            | 00167       | 00167       | uridylyltransferase                                                                                                                                                                                   |
| SNP  | 184133 C_T | G544(GGC_glnD              | G544(GGC_glnD            | 00167       | 00167       | uridylyltransferase                                                                                                                                                                                   |
| SNP  | 184868 A_G | V94V(GTT_G map             | V94V(GTT_G map           | 00168       | 00168       | methionine aminopeptidase                                                                                                                                                                             |
| SNP  | 185151 A_G | intergenic (-) map/psb     | map/psb                  | 00168/b0166 | 00168/b0166 | methionine aminopeptidase/30S ribosomal subunit protein S2                                                                                                                                            |
| SNP  | 187673 T_T | G586(GGC_1sp               | G586(GGC_1sp             | 00171       | 00171       | uridylylase                                                                                                                                                                                           |
| SNP  | 202373 A_G | G335(AAA_dnaE              | G335(AAA_dnaE            | 00184       | 00184       | DNA polymerase III alpha subunit                                                                                                                                                                      |
| SNP  | 207997 A_G | Q8Q(CAA_C1sH               | Q8Q(CAA_C1sH             | 00188       | 00188       | tRNA(Ile)-lysidine synthetase                                                                                                                                                                         |
| SNP  | 213157 C_T | G4183(GGT_1proS            | G4183(GGT_1proS          | 00194       | 00194       | prolyl-tRNA synthetase                                                                                                                                                                                |
| INS  | 229727     | INAME1                     | coding (653) fadB        | 00212       | 00212       | hydroxyglutathione hydrolase                                                                                                                                                                          |
| DEL  | 23807      | 1bp                        | coding (900) fadE        | 00221       | 00221       | acyl coenzyme A dehydrogenase                                                                                                                                                                         |
| SNP  | 238824 G_A | G41(GGT_C1fadE             | G41(GGT_C1fadE           | 00221       | 00221       | acyl coenzyme A dehydrogenase                                                                                                                                                                         |
| SNP  | 242002 C_T | F129(WGC_1he               | F129(WGC_1he             | 00227       | 00227       | predicted lipoprotein and C40 family peptidase                                                                                                                                                        |
| SNP  | 251688 G_A | L231(CTG_CT gpt            | L231(CTG_CT gpt          | 00238       | 00238       | guanine-hypoxanthine phosphoribosyltransferase                                                                                                                                                        |
| INS  | 257855     | INAME1                     | intergenic (-) thrW/kfN  | 00244/b462  | 00244/b462  | RNA Thp/pseudogene, yda family                                                                                                                                                                        |
| SNP  | 279871 C_T | R620(WGC_ynfP              | R620(WGC_ynfP            | 00269       | 00269       | CN4-G-prophage; predicted dehydratase                                                                                                                                                                 |
| SNP  | 302400 A_G | R600(AAC_1yngK             | R600(AAC_1yngK           | 00281       | 00281       | predicted aromatic compound dihydrogenase                                                                                                                                                             |
| INS  | 304918     | INAME1                     | intergenic (-) matC/matB | 00292/b0293 | 00292/b0293 | predicted protein/cryptic Mat fibrillin gene                                                                                                                                                          |
| INS  | 311442     | INAME1                     | pseudogene ynfA          | 00300       | 00300       | pseudogene, Arac family/putative regulator; Not classified; putative ARAC-type regulatory protein                                                                                                     |
| SNP  | 313511 C_T | intergenic (-) ynfK/yngK   | ynfK/yngK                | 00300/b0300 | 00300/b0300 | predicted protein/putative pyridine nucleoside-disulfide oxidoreductase                                                                                                                               |
| DEL  | 316425     | 1bp                        | intergenic (-) ynfK/yngK | 00300/b0300 | 00300/b0300 | predicted DNA-binding transcriptional regulator/predicted oxidoreductase                                                                                                                              |
| SNP  | 321440 G_A | I179(ATC_A1beta            | I179(ATC_A1beta          | 00311       | 00311       | choline dehydrogenase, a flavoprotein                                                                                                                                                                 |
| SNP  | 322283 T_T | V467(WGC_1heB              | V467(WGC_1heB            | 00312       | 00312       | betaine aldehyde dehydrogenase, NAD-dependent                                                                                                                                                         |
| SNP  | 325685 C_T | V452(WTC_1betT             | V452(WTC_1betT           | 00314       | 00314       | choline transporter of high affinity                                                                                                                                                                  |
| SNP  | 326005 C_T | A559(WGC_1betT             | A559(WGC_1betT           | 00314       | 00314       | choline transporter of high affinity                                                                                                                                                                  |
| SNP  | 32676 G_G  | intergenic (-) betT/yahA   | betT/yahA                | 00314/b0315 | 00314/b0315 | choline transporter of high affinity/(-)-di-GMP-specific phosphodiesterase                                                                                                                            |
| SNP  | 329731 C_T | S332(TTG_1he               | S332(TTG_1he             | 00317       | 00317       | predicted inner membrane protein                                                                                                                                                                      |
| SNP  | 329922 C_T | intergenic (-) yahC/yahD   | yahC/yahD                | 00317/b0318 | 00317/b0318 | predicted inner membrane protein/ankyrin repeat protein                                                                                                                                               |
| SNP  | 336428 G_G | D146(GAC_yahU              | D146(GAC_yahU            | 00324       | 00324       | predicted deaminase with metallo-dependent hydrolase domain                                                                                                                                           |
| SNP  | 336731 C_T | F136(WGC_1he               | F136(WGC_1he             | 00325       | 00325       | predicted deaminase with metallo-dependent hydrolase domain                                                                                                                                           |
| SNP  | 338189 C_T | Q147(CAA_yahK              | Q147(CAA_yahK            | 00325       | 00325       | predicted oxidoreductase, Zn-dependent and NAD(P)-binding                                                                                                                                             |
| SNP  | 338824 A_T | intergenic (-) yahK/yahL   | yahK/yahL                | 00325/b0326 | 00325/b0326 | predicted oxidoreductase, Zn-dependent and NAD(P)-binding/predicted protein                                                                                                                           |
| DEL  | 362709     | 2bp                        | coding (578) ynfM        | 00326       | 00326       | DNA-binding transcriptional activator, 3HPP-binding                                                                                                                                                   |
| SNP  | 365730 G_A | L386(WGT_1mhB              | L386(WGT_1mhB            | 00348       | 00348       | 1,2-dihydroxyphenylpropanoate 1,2-dioxygenase                                                                                                                                                         |
| INS  | 374879     | INAME1                     | intergenic (-) frmK/yaiO | 00357/b0358 | 00357/b0358 | regulator protein that represses frmAB operon/outer membrane protein                                                                                                                                  |
| SNP  | 375276 G_G | V1454(WGC_1he              | V1454(WGC_1he            | 00358       | 00358       | outer membrane protein                                                                                                                                                                                |
| SNP  | 382118 C_T | F298(WGC_1he               | F298(WGC_1he             | 00358       | 00358       | outer membrane protein                                                                                                                                                                                |
| SNP  | 388155 A_G | pseudogene ynfA            | ynfA                     | 04580       | 04580       | predicted protein/putative structure; Not classified; putative flagellin structural protein; interrupted by 53                                                                                        |
| SNP  | 388300 A_G | pseudogene ynfA            | ynfA                     | 04580       | 04580       | predicted protein/putative structure; Not classified; putative flagellin structural protein; interrupted by 53                                                                                        |
| SNP  | 391712 G_G | L591(WGC_1he               | L591(WGC_1he             | 00377       | 00377       | protein B17 transporter                                                                                                                                                                               |
| SNP  | 395048 A_G | V248(WTA_d4A               | V248(WTA_d4A             | 00381       | 00381       | D-alanine-D-alanine ligase A                                                                                                                                                                          |
| SNP  | 398444 T_C | S995(AGT_A1psf             | S995(AGT_A1psf           | 00384       | 00384       | conserved protein, Puf family, pho regulon                                                                                                                                                            |
| DEL  | 402275     | 1bp                        | intergenic (-) ynfA/aroM | 00388/b0396 | 00388/b0396 | predicted protein/conserved protein, AroM family; regulated by aroK                                                                                                                                   |
| SNP  | 402400 A_G | N655(AAC_A1aroM            | N655(AAC_A1aroM          | 00390       | 00390       | conserved protein, AroM family; regulated by aroK                                                                                                                                                     |
| SNP  | 416097 A_G | N825(AAC_A1proY            | N825(AAC_A1proY          | 00402       | 00402       | proline-specific permease                                                                                                                                                                             |
| SNP  | 423013 C_T | T156(ACT_A1sed             | T156(ACT_A1sed           | 00408       | 00408       | SecYEG protein translocase auxiliary subunit                                                                                                                                                          |
| SNP  | 425019 C_T | R235(WGC_1he               | R235(WGC_1he             | 00411       | 00411       | SecYEG protein translocase auxiliary subunit                                                                                                                                                          |
| SNP  | 426515 T_C | K122(AAA_1tsx              | K122(AAA_1tsx            | 00411       | 00411       | nucleoside channel, receptor of phage T6 and colicin K                                                                                                                                                |
| SNP  | 434536 G_A | I170(ATC_A1dks             | I170(ATC_A1dks           | 00420       | 00420       | 1-deoxyxylulose-5-phosphate synthase, thiamine-requiring, FAD-requiring                                                                                                                               |
| SNP  | 434579 T_C | T156(WGC_1he               | T156(WGC_1he             | 00420       | 00420       | 1-deoxyxylulose-5-phosphate synthase, thiamine-requiring, FAD-requiring                                                                                                                               |
| SNP  | 441822 C_T | G2515(WGT_1cyoE            | G2515(WGT_1cyoE          | 00428       | 00428       | prothrome IX farnesyltransferase                                                                                                                                                                      |
| SNP  | 442461 G_A | L381(CTG_TT cyoE           | L381(CTG_TT cyoE         | 00428       | 00428       | prothrome IX farnesyltransferase                                                                                                                                                                      |
| SNP  | 442724 G_G | G481(WGC_1cyoD             | G481(WGC_1cyoD           | 00429       | 00429       | cytochrome c ubiquinol oxidase subunit IV                                                                                                                                                             |
| SNP  | 442731 G_G | L594(CTG_TT cyoD           | L594(CTG_TT cyoD         | 00429       | 00429       | cytochrome c ubiquinol oxidase subunit IV                                                                                                                                                             |
| SNP  | 453184 T_C | F298(WTT_C1cpX             | F298(WTT_C1cpX           | 00438       | 00438       | ATPase and specificity subunit of CtpX-CtpA ATP-dependent serine protease                                                                                                                             |
| INS  | 453600     | INAME1                     | intergenic (-) ctpX/lon  | 00438/b0438 | 00438/b0438 | ATPase and specificity subunit of CtpX-CtpA ATP-dependent serine protease/DNA-binding ATP-dependent protease La                                                                                       |
| SNP  | 476519 A_G | F393(WTC_1he               | F393(WTC_1he             | 00463       | 00463       | multidrug efflux system protein                                                                                                                                                                       |
| SNP  | 478405 A_G | L289(CTG_1he               | L289(CTG_1he             | 00463       | 00463       | multidrug efflux system protein                                                                                                                                                                       |
| SNP  | 479413 A_G | R358(WGC_1acrA             | R358(WGC_1acrA           | 00463       | 00463       | multidrug efflux system protein                                                                                                                                                                       |
| SNP  | 495884 A_G | D296(WGC_1pk               | D296(WGC_1pk             | 00477       | 00477       | inositol/guanosine kinase                                                                                                                                                                             |
| SNP  | 496125 A_G | F778(WTA_1pk               | F778(WTA_1pk             | 00477       | 00477       | inositol/guanosine kinase                                                                                                                                                                             |
| SNP  | 497791 C_T | A105A(GCG_ybaL             | A105A(GCG_ybaL           | 00478       | 00478       | predicted transporter with NAD(P)-binding Rossmann-fold domain                                                                                                                                        |
| SNP  | 499630 C_T | intergenic (-) ftr/ynfA    | ftr/ynfA                 | 00479/b0480 | 00479/b0480 | predicted fosmidomycin efflux system/bifunctional UDP-sugar hydrolase/5'-nucleosidase                                                                                                                 |
| SNP  | 502629 C_T | D90(WGC_1he                | D90(WGC_1he              | 00484       | 00484       | copper transporter subunit                                                                                                                                                                            |
| SNP  | 507905 C_T | R155(WGC_ybaT              | R155(WGC_ybaT            | 00486       | 00486       | predicted transporter                                                                                                                                                                                 |
| SNP  | 509491 C_C | V796(WTC_1he               | V796(WTC_1he             | 00488       | 00488       | inner membrane protein that stimulates the fliH hcr mutant suppressor activity of OmcA                                                                                                                |
| SNP  | 510773 T_C | S241(CTG_1he               | S241(CTG_1he             | 00490/b0490 | 00490/b0490 | multisubunit protease with histH double mutant; membrane-anchored predicted of protein with C-terminal cytoplasmic PHB domain/predicted transporter subunit; ATP-binding component of ABC superfamily |
| SNP  | 511679 C_T | A77(WGC_1ybaM              | A77(WGC_1ybaM            | 00491       | 00491       | inner membrane protein, LIP00014 family                                                                                                                                                               |
| SNP  | 512387 T_C | T254A(ACG_ybaN             | T254A(ACG_ybaN           | 00492       | 00492       | DnaK co-chaperone, thioredoxin-like protein                                                                                                                                                           |
| SNP  | 514124 A_G | V704(WTC_1he               | V704(WTC_1he             | 00494       | 00494       | multifunctional acyl-CoA thioesterase I and protease I and liposphospholipase L1                                                                                                                      |
| SNP  | 517281 C_T | A690(WGC_1he               | A690(WGC_1he             | 00496       | 00496       | predicted ABC transporter permease                                                                                                                                                                    |
| INS  | 518073     | INAME1                     | intergenic (-) ybbP/rhdD | 00496/b0493 | 00496/b0493 | predicted ABC transporter permease/rhdD element protein                                                                                                                                               |
| SNP  | 520270 T_G | N7155(AAC_rhdD             | N7155(AAC_rhdD           | 00497       | 00497       | rhdD element protein                                                                                                                                                                                  |
| SNP  | 520701 C_T | G881(WGC_rhdD              | G881(WGC_rhdD            | 00497       | 00497       | rhdD element protein                                                                                                                                                                                  |
| SNP  | 528954 C_T | AS8V(WGC_Gcd               | AS8V(WGC_Gcd             | 00507       | 00507       | glyoxylate carboxylase                                                                                                                                                                                |
| SNP  | 531649 A_G | T661(WTA_MprR              | T661(WTA_MprR            | 00509       | 00509       | tartronate semialdehyde reductase, NADH-dependent                                                                                                                                                     |
| SNP  | 535730 G_A | G934(CTG_1he               | G934(CTG_1he             | 00513       | 00513       | predicted urea/L-arginine transporter                                                                                                                                                                 |
| SNP  | 544297 C_T | Q359(WGC_1he               | Q359(WGC_1he             | 00522       | 00522       | were a pseudo gene - frameshift fused                                                                                                                                                                 |
| SNP  | 545709 A_G | A135A(GCA_ybcF             | A135A(GCA_ybcF           | 00521       | 00521       | predicted carbamate kinase                                                                                                                                                                            |
| SNP  | 548437 C_T | G665(WGT_A1pH              | G665(WGT_A1pH            | 00524       | 00524       | UDP-2,3-diacylglycerol pyrophosphatase                                                                                                                                                                |
| SNP  | 552061 C_T | R086(WGC_1he               | R086(WGC_1he             | 00529       | 00529       | uridine 5,10-methylene-tetrahydrofolate dehydrogenase/ 5,10-methylene-tetrahydrofolate cyclohydrolase                                                                                                 |
| SNP  | 553139 A_G | Y21(CTAT_1he               | Y21(CTAT_1he             | 00530       | 00530       | predicted fibrin-like adhesion protein                                                                                                                                                                |
| INS  | 557533     | -                          | coding (326) rfmI        | 00533       | 00533       | predicted fibrin-like adhesion protein                                                                                                                                                                |
| SNP  | 570818 A_G | intergenic (-) ynfM        | ynfM                     | 00533       | 00533       | DLP12 membrane protein/outer membrane porin (pseudogene)is, phage, Tn, Phage or Prophage Related; outer membrane porin protein; locus of qsr prophage                                                 |
| INS  | 573118     | -                          | coding (187) rfpD        | 00556       | 00556       | DLP12 prophage; predicted murein endopeptidase                                                                                                                                                        |
| SNP  | 575940 A_G | T81A(CTG_1he               | T81A(CTG_1he             | 00560       | 00560       | DLP12 prophage; DNA packaging protein                                                                                                                                                                 |
| SNP  | 588914 C_T | L241(CTG_1he               | L241(CTG_1he             | 00570       | 00570       | sensory histidine kinase in two-component regulatory system with CuxR, senses copper ions                                                                                                             |
| SNP  | 597621 A_G | A136A(GCG_1he              | A136A(GCG_1he            | 00576       | 00576       | phenylalanine transporter                                                                                                                                                                             |
| SNP  | 599924 A_G | F123A(CTG_C1hB             | F123A(CTG_C1hB           | 00578       | 00578       | dihydropteridine reductase, NAD(P)H-dependent, oxygen-insensitive                                                                                                                                     |
| SNP  | 612804 A_G | E1262(GAG_1he              | E1262(GAG_1he            | 00586       | 00586       | enterobactin synthase multienzyme complex component, ATP-dependent                                                                                                                                    |
| SNP  | 613013 C_C | intergenic (-) ynfE/pepT   | ynfE/pepT                | 00586/b0586 | 00586/b0586 | enterobactin synthase multienzyme complex component, ATP-dependent/regulator of length of O-antigen component of lipopolysaccharide chains                                                            |
| SNP  | 620311 C_T | A194(WGC_1he               | A194(WGC_1he             | 00593       | 00593       | isochloraninate synthase 1                                                                                                                                                                            |
| SNP  | 624775 G_G | K6E(AAA_GA csaA            | K6E(AAA_GA csaA          | 00598       | 00598       | carbon starvation protein                                                                                                                                                                             |
| SNP  | 625804 A_G | T340A(ACC_1he              | T340A(ACC_1he            | 00598       | 00598       | carbon starvation protein                                                                                                                                                                             |
| SNP  | 629843 G_A | R134(CTG_1he               | R134(CTG_1he             | 00601       | 00601       | conserved protein                                                                                                                                                                                     |
| SNP  | 632802 T_T | G213E(GGC_1he              | G213E(GGC_1he            | 00604       | 00604       | thiol-disulfide interchange protein, periplasmic                                                                                                                                                      |
| SNP  | 640013 C_T | G479(WGC_1he               | G479(WGC_1he             | 00612       | 00612       | citrate/succinate antiporter                                                                                                                                                                          |
| SNP  | 655538 A_G | R144(WGC_1he               | R144(WGC_1he             | 00619       | 00619       | predicted DNA-binding transcriptional regulator                                                                                                                                                       |
| SNP  | 661116 G_A | L224(CTG_TT mrdB           | L224(CTG_TT mrdB         | 00634       | 00634       | cell wall shape-determining protein                                                                                                                                                                   |
| SNP  | 669772 C_T | intergenic (-) ynfU/ynfV</ |                          |             |             |                                                                                                                                                                                                       |

|     |                |                           |                |                                                                                                                                                                  |
|-----|----------------|---------------------------|----------------|------------------------------------------------------------------------------------------------------------------------------------------------------------------|
| SNP | 963258_C_T     | P1725(CCG_ycal            | b0913          | inner membrane protein, ComEC family of competence proteins                                                                                                      |
| SNP | 962146_C_T     | R248(CCT_Cvba)            | b0927          | predicted metal-binding enzyme                                                                                                                                   |
| INS | 987463_INAME1  | intergenic (-1:545)gncb   | b0930/b0933    | isoparganinyl tRNA synthetase/isocitinate phosphoribosyltransferase                                                                                              |
| SNP | 997267_C_T     | A118(VGCA_eId             | b0939          | predicted periplasmic pilin chaperone                                                                                                                            |
| INS | 1002578_INAME1 | coding (207)/yfcP         | b0944          | predicted periplasmic pilin chaperone                                                                                                                            |
| INS | 1003105_INAME1 | intergenic (-1:145)pyrD   | b0946/b0945    | predicted periplasmic pilin chaperone/dihydro-orotate oxidase, FMN-linked                                                                                        |
| SNP | 1011629_C_T    | P4025(CCG_pqa)            | b0950          | paraquat-inducible membrane protein A                                                                                                                            |
| SNP | 1016788_C_T    | intergenic (-1:23)matP    | b0955/b0955    | predicted peptidase/Ter macromodular organizer mats-binding protein                                                                                              |
| SNP | 1017462_C_T    | intergenic (-1:10)maA     | b0955          | Ter macromodular organizer mats-binding protein/outer membrane protein A (3a)1 <sup>st</sup> ,Gsd                                                                |
| SNP | 1018428_G_A    | T171(ACC_AcompA           | b0957          | outer membrane protein A (3a)1 <sup>st</sup> ,Gsd                                                                                                                |
| SNP | 1019952_A_G    | E130E(GAA_say             | b0959          | required for expression of CRP-S-dependent promoters                                                                                                             |
| INS | 1029211_INAME1 | intergenic (-1:164)ycyca  | b0969/b0973    | suflutrantransferase required for 3-thiolation step of mnmS5-s12J34-rRNA synthesis/HMBKC-binding inner membrane protein, UPF0005 family                          |
| SNP | 1031030_G_A    | G164(GCG_hyaK             | b0972          | hydrogenase 1, large subunit                                                                                                                                     |
| SNP | 1031983_A_G    | N1025(AAC_hyaB            | b0973          | hydrogenase 1, large subunit                                                                                                                                     |
| INS | 1051935_INAME1 | coding (2639)torS         | b0993          | hybrid sensory histidine kinase in two-component regulatory system with TorR                                                                                     |
| SNP | 1052262_C_T    | P744(GCC_torS             | b0993          | hybrid sensory histidine kinase in two-component regulatory system with TorR                                                                                     |
| SNP | 1053187_G_A    | P4633(CCC_torS            | b0993          | hybrid sensory histidine kinase in two-component regulatory system with TorR                                                                                     |
| SNP | 1054999_C_T    | A109(VGCC_torT            | b0994          | periplasmic sensory protein associated with the TorRS two-component regulatory system                                                                            |
| SNP | 1055025_C_T    | S114(LCA_torT             | b0994          | periplasmic sensory protein associated with the TorRS two-component regulatory system                                                                            |
| SNP | 1055609_A_G    | N1345(AAC_torC            | b0996          | trimethylamine N-oxide (TMAO) reductase I, cytochrome c-type subunit                                                                                             |
| SNP | 1063315_T_C    | S2855(AGT_ycyC            | b1001          | predicted protein                                                                                                                                                |
| INS | 1070707_C_C    | coding (3159)hnbH         | b1011          | ureidobicyclic amidohydrolase                                                                                                                                    |
| SNP | 1074670_A_G    | F780(UTC_CpudA            | b1014          | fused DNA-binding transcriptional regulator/proline dehydrogenase/pyrroline-5-carboxylate dehydrogenase                                                          |
| SNP | 1076351_G_A    | G319(GCG_puaA             | b1014          | fused DNA-binding transcriptional regulator/proline dehydrogenase/pyrroline-5-carboxylate dehydrogenase                                                          |
| INS | 1095636_INAME1 | intergenic (-1:ycyD)serX  | b1029/b1032    | predicted inner membrane protein/rRNA-Ser                                                                                                                        |
| INS | 1095938_INAME1 | monocoding (5)serX        | b1032          | rRNA-Ser                                                                                                                                                         |
| SNP | 1113240_C_T    | V226(GTC_rmtD             | b1053          | predicted drug efflux system                                                                                                                                     |
| SNP | 1118656_G_A    | A119(VGCC_suaA            | b1059          | N-methyltryptophan oxidase, FAD-binding                                                                                                                          |
| SNP | 1118825_C_T    | A531(GCT_A_suaA           | b1059          | N-methyltryptophan oxidase, FAD-binding                                                                                                                          |
| SNP | 1119121_T_C    | intergenic (-1:160)hbaS   | b1059/b1060    | N-methyltryptophan oxidase, FAD-binding/biofilm regulator                                                                                                        |
| SNP | 1133524_A_G    | Q1248(CAG_flgG            | b1078          | flagellar component of cell-distal portion of basal-body rod                                                                                                     |
| SNP | 1134511_A_G    | T1754(ACC_flgH            | b1079          | flagellar protein of basal-body outer-membrane r-ring                                                                                                            |
| SNP | 1139032_C_T    | G188(GCC_flgE             | b1083          | flagellar hook-flare-2 C-methylerythritol kinase                                                                                                                 |
| SNP | 1140309_C_T    | L828(ITTG_rme             | b1084          | fused ribonuclease E, endoribonuclease/RNA-binding protein/RNA deprossome binding protein                                                                        |
| SNP | 1155924_G_A    | E2411(GAA_ycyH            | b1100          | predicted DNase                                                                                                                                                  |
| SNP | 1160526_C_T    | E306(GCC_ycyH             | b1103          | putative nucleoside phosphoramide_sdaA activator protein                                                                                                         |
| SNP | 1165117_G_A    | G184(GCC_nhd              | b1109          | respiratory NADH dehydrogenase 2/cypric reductase                                                                                                                |
| SNP | 1166159_A_G    | T424(AGC_ycyC             | b1110          | predicted protein                                                                                                                                                |
| SNP | 1170555_C_G    | V624(GTA_mfd              | b1114          | transcription-repair coupling factor                                                                                                                             |
| SNP | 1170569_C_T    | G169(AGC_ycyC             | b1114          | transcription-repair coupling factor                                                                                                                             |
| SNP | 1175012_T_C    | A387(AGC_tolC             | b1116          | lipoprotein-releasing system transmembrane protein                                                                                                               |
| SNP | 1184344_C_T    | T164(AGC_pgpT             | b1127          | peptidase T                                                                                                                                                      |
| SNP | 1186732_C_T    | A177(GCC_ycyE             | b1129          | sensory histidine kinase in two-component regulatory system with PhoP                                                                                            |
| SNP | 1196751_C_T    | intergenic (-1:ymf)lit    | b1138/b1135e14 | prphage; predicted inner membrane protein/e14 prphage; cell death peptidase, inhibitor of 14 late gene expression                                                |
| SNP | 1206652_G_A    | W371(TGG_t1aP             | b1155          | e14 prphage; predicted protein                                                                                                                                   |
| SNP | 1210565_C_G    | intergenic (-1:19)hlyVegS | b1160/b1161    | HlyB stabilizing HlyG-stabilator, anti-RhoB factor/predicted protein                                                                                             |
| INS | 1219781_A_G    | pseudogene yegH           | b4491          | Probable pseudogene; putative ATP-binding component of a transport system                                                                                        |
| SNP | 1221510_T_C    | N270(AAT_Gymg             | b4593          | hypothetical protein                                                                                                                                             |
| DEL | 1222403_1bp    | intergenic (-1:ycg)hmlT   | b4622/b1176    | pseudogene/cell division topological specificity factor                                                                                                          |
| SNP | 1225808_C_T    | E365(AGC_galg             | b1179          | predicted protein                                                                                                                                                |
| INS | 1226193_INAME1 | coding (55)2:ycg          | b1179          | conserved protein                                                                                                                                                |
| SNP | 1228996_C_T    | intergenic (-1:116)rumD   | b1182/b1181    | Hemolysin E/DNA polymerase V, subunit D                                                                                                                          |
| SNP | 1233366_G_A    | L20(CTC_ATCsdb            | b1187          | DNA-binding transcriptional dual regulator of fatty acid metabolism                                                                                              |
| SNP | 1233622_C_T    | A87(GCC_c1aR              | b1187          | DNA-binding transcriptional dual regulator of fatty acid metabolism                                                                                              |
| SNP | 1237720_C_T    | G425(GGC_dadA             | b1189          | D-amino acid dehydrogenase                                                                                                                                       |
| SNP | 1241502_G_A    | S291(GTC_C1aA             | b1192          | L-D-carboxypeptidase A                                                                                                                                           |
| SNP | 1241889_T_C    | E596(GCT_DemaA            | b1193          | HlyC mucin endoribonuclease/lysostaphin E                                                                                                                        |
| SNP | 1247581_A_G    | M201(ATG_dhaI             | b1199          | dihydroxyacetone kinase, C-terminal domain                                                                                                                       |
| SNP | 1252983_A_G    | G465(GCG_ycgV             | b1202          | predicted adhesin                                                                                                                                                |
| SNP | 1251097_C_T    | E192(GCC_C1aE             | b1202          | diphosphophoryl-2-C-methylerythritol kinase                                                                                                                      |
| SNP | 1276147_A_G    | intergenic (-1:narX/narK  | b1222/b1223    | sensory histidine kinase in two-component regulatory system with NarI/nitrate/nitrite transporter                                                                |
| SNP | 1292111_A_G    | A46V(GCC_C1ns             | b1237          | global DNA-binding transcriptional dual regulator H-Ns                                                                                                           |
| SNP | 1294614_A_G    | S946(GCC_C1ns             | b1237          | global DNA-binding transcriptional dual regulator H-Ns                                                                                                           |
| MOB | 1297920        | intergenic (-1:ycb)oppA   | b1242/b1242    | predicted inner membrane protein/oligopeptide transporter subunit                                                                                                |
| SNP | 1299279_A_G    | H291(CAC_oppA             | b1243          | oligopeptide transporter subunit                                                                                                                                 |
| SNP | 1300229_C_T    | F591(TTT_TT_oppB          | b1244          | oligopeptide transporter subunit                                                                                                                                 |
| SNP | 1300959_A_G    | T294(AGC_oppB             | b1244          | oligopeptide transporter subunit                                                                                                                                 |
| DEL | 1311722_1bp    | coding (477)ompW          | b1256          | outer membrane protein W                                                                                                                                         |
| SNP | 1321140_C_T    | S1981(CTC_ycyJ            | b1266          | conserved protein                                                                                                                                                |
| SNP | 1323772_C_T    | H609(AGC_ycyC             | b1268          | predicted inner membrane protein                                                                                                                                 |
| DEL | 1325931_1bp    | coding (408)ycyK          | b1271          | predicted oxoacyl-(acyl carrier protein) reductase, EmrKv-TotC-binding                                                                                           |
| SNP | 1331993_C_T    | R105(GCC_ycyB             | b1275          | DNA-binding transcriptional dual regulator, O-acetyl-L-serine-binding                                                                                            |
| SNP | 1332055_C_G    | A292(GCC_ycyB             | b1275          | DNA-binding transcriptional dual regulator, O-acetyl-L-serine-binding                                                                                            |
| SNP | 1333412_C_T    | P191(CCG_CscaA            | b1276          | aconitate hydratase 1                                                                                                                                            |
| SNP | 1336698_T_C    | V484(GTC_gpgB             | b1278          | phosphatidylglycerophosphatase B                                                                                                                                 |
| SNP | 1339571_G_A    | G142(GCC_pyrF             | b1281          | orotidine-5-phosphate decarboxylase                                                                                                                              |
| SNP | 1343643_A_G    | E195(GCC_eme              | b1285          | cyclic-di-GMP phosphodiesterase; csgD regulator; modulator of RseII stability                                                                                    |
| SNP | 1346180_A_G    | intergenic (-1:rmB)yciW   | b1286/b1287    | ribonuclease II/predicted oxidoreductase                                                                                                                         |
| SNP | 1347525_A_G    | V247(VGT_f1aB1            | b1288          | enoyl-(acyl-carrier-protein) reductase, NADH-dependent                                                                                                           |
| SNP | 1350926_G_A    | E192(GCC_puqD             | b1298          | gamma-Glu-GABA hydrolase                                                                                                                                         |
| SNP | 1361292_C_T    | R442'(VGA_puqC            | b1300          | gamma-Glu-gamma-aminobutyraldehyde dehydrogenase, NAD(P)H-dependent                                                                                              |
| SNP | 1370435_A_G    | intergenic (-1:ycjN)ycjQ  | b1310/b1311    | predicted sugar transporter subunit; periplasmic-binding component of ABC superfamily/predicted sugar transporter subunit; membrane component of ABC superfamily |
| SNP | 1371109_C_T    | A221(VGCC_ycjQ            | b1311          | predicted sugar transporter subunit; membrane component of ABC superfamily                                                                                       |
| INS | 1389979_INAME1 | coding (183)ymzF          | b1318          | predicted DNA-binding transcriptional regulator                                                                                                                  |
| DEL | 1416324_1bp    | coding (428)sieB          | b1353          | Rac prphage; phage superinfection exclusion protein                                                                                                              |
| DEL | 1418882_A_G    | N180(DAAT_ycaJ            | b1359          | Rac prphage; conserved protein                                                                                                                                   |
| DEL | 1423213_1bp    | intergenic (-1:136)ymaA   | b1360/b1360    | Phage-related/Rac prphage-Phage or Phophage Related/Rac prphage; pseudogene, tail protein homology/Phage or Phophage Related; putative alpha helix protein       |
| DEL | 1429333_2bp    | coding (3059)hfr          | b1372          | Rac prphage; predicted tail fiber protein                                                                                                                        |
| SNP | 1436053_A_G    | A653(VGCC_ydbK            | b1378          | fused predicted pyruvate-flavodoxin oxidoreductase; conserved protein/conserved protein/FeS binding protein                                                      |
| SNP | 1437213_C_T    | A653(VGCC_ydbK            | b1378          | fused predicted pyruvate-flavodoxin oxidoreductase; conserved protein/conserved protein/FeS binding protein                                                      |
| SNP | 1449937_A_G    | V311(AGT_paaZ             | b1387          | fused oxepin-CoA hydrolase/3-oxo-5,6-dehydrooxepin-CoA semialdehyde dehydrogenase                                                                                |
| INS | 1450172_C_C    | coding (697)paaz          | b1387          | fused oxepin-CoA hydrolase/3-oxo-5,6-dehydrooxepin-CoA semialdehyde dehydrogenase                                                                                |
| SNP | 1451320_A_G    | A544(GCA_paaA             | b1388          | ring 1,2-ephenylacetyl-CoA epoxidase subunit                                                                                                                     |
| SNP | 1463351_A_G    | pseudogene ydbA           | b4492          | pseudogene, autotransporter homolog; interrupted by IS2 and IS30                                                                                                 |
| SNP | 1466392_A_G    | pseudogene ydbA           | b4492          | pseudogene, autotransporter homolog; interrupted by IS2 and IS30                                                                                                 |
| SNP | 1467666_G_A    | pseudogene ydbA           | b4492          | pseudogene, autotransporter homolog; interrupted by IS2 and IS30                                                                                                 |
| SNP | 1473605_C_T    | G143(CAA_ynfC             | b1417          | predicted PF0971 family periplasmic methylglyoxal resistance protein                                                                                             |
| SNP | 1477986_A_G    | K541(KAA_ynbC             | b1410          | predicted hydrolase                                                                                                                                              |
| SNP | 1479185_A_G    | E388(GAA_ynbD             | b1411          | predicted phosphatase inner membrane protein                                                                                                                     |
| SNP | 1490152_C_T    | V191(GTT_C1ns             | b1440          | polyhydroxybutyrate (PHB) synthase, ABC transporter periplasmic binding protein homolog                                                                          |
| SNP | 1519144_A_G    | E286(GCC_ynfU             | b1442          | predicted spermidine/putrescine transporter subunit                                                                                                              |
| SNP | 1520319_A_G    | intergenic (-1:yncD)yncE  | b1451/b1452    | predicted iron outer membrane transporter/ATP-binding protein, periplasmic, function unknown                                                                     |
| SNP | 1536022_A_G    | C262(TGT_Tnaary           | b1467          | nitrate reductase 2 (Nrd2), beta subunit                                                                                                                         |
| SNP | 1548013_C_A    | E1120(GCC_eme             | b1475          | formate dehydrogenase-N, Fe-S (beta) subunit, nitrate-inducible                                                                                                  |
| SNP | 1548324_T_C    | V213(AGT_fldH             | b1475          | malate dehydrogenase, (decarboxylating, NAD-requiring) (malic enzyme)                                                                                            |
| INS | 1552874_INAME1 | coding (223)maeA          | b1479          | D-D-glucosylidase system, ATP-binding component                                                                                                                  |
| SNP | 1555148_C_T    | E209(GTC_ynfD             | b1484          | D-D-glucosylidase system, ATP-binding component                                                                                                                  |
| SNP | 1558083_T_C    | intergenic (-1:ddpB)ddpA  | b1486/b1487    | D-ala-D-ala transporter subunit/D-ala-D-ala transporter subunit                                                                                                  |
| SNP | 1560900_G_A    | R718(CGC_cddpX            | b1488          | D-ala-D-ala dipeptidase, Zn-dependent                                                                                                                            |
| SNP | 1570185_C_T    | S748(CTC_pggG             | b1494          | predicted peptidase                                                                                                                                              |
| SNP | 1574310_A_G    | T244(CTC_cdbB             | b1495          | predicted protein                                                                                                                                                |
| SNP | 1579291_T_C    | T1544(ACC_ycdN            | b1498          | conserved protein                                                                                                                                                |
| SNP | 1581112_G_A    | V254(GTT_C_sufA           | b1500          | 'Two component system connector membrane protein, EvgSA to PhoQP                                                                                                 |
| SNP | 1582188_C_T    | V920(GTC_ycyE             | b1501          | predicted oxidoreductase                                                                                                                                         |
| SNP | 1582490_A_G    | V4084(GTA_ydeP            | b1501          | predicted oxidoreductase                                                                                                                                         |
| DEL | 1591931_1bp    | pseudogene ynfO           | b4696          | pseudogene, Aida homolog                                                                                                                                         |
| INS | 1591974_C_C    | pseudogene ynfO           | b4696          | pseudogene, Aida homolog                                                                                                                                         |
| DEL | 1594533_1bp    | pseudogene ynfO           | b4696          | pseudogene, Aida homolog                                                                                                                                         |
| SNP | 1601583_A_G    | N1045(AAC_hsdR            | b1515          | autoluciferase 2 import system permease protein                                                                                                                  |
| SNP | 1604084_G_A    | A247(GCT_ynfR             | b1517          | putative autoluciferase-2 (A1-2) aldolase                                                                                                                        |
| DEL | 1615024_1bp    | coding (171)ycyK          | b1524          | predicted arabinose transporter                                                                                                                                  |
| SNP | 1616154_T_C    | intergenic (-1:mar)marR   | b1529/b1530    | inner membrane protein, UPF0056 family/DNA-binding transcriptional repressor of multiple antibiotic resistance                                                   |
| INS | 1621575_INAME1 | coding (149)ycyE          | b1536          | conserved protein                                                                                                                                                |
| SNP | 1629659_T_C    | pseudogene ynfJ           | b4600          | pseudogene, MFS transporter family; interrupted by Qln prphage-Phage or Phophage Related; putative transporter protein                                           |
| SNP | 1631282_C_T    | pseudogene ynfJ           | b4600          | pseudogene, MFS transporter family; interrupted by Qln prphage-Phage or Phophage Related; putative transporter protein                                           |
| SNP | 1634635_A_G    | pseudogene ynfJ           | b4600          | pseudogene, MFS transporter family; interrupted by Qln prphage-Phage or Phophage Related; putative transporter protein                                           |
| SNP | 1645797_A_G    | pseudogene ynfJ           | b4600          | pseudogene, MFS transporter family; interrupted by Qln prphage-Phage or Phophage Related; putative transporter protein                                           |
| SNP | 1646535_T_C    | pseudogene ynfJ           | b4600          | pseudogene, MFS transporter family; interrupted by Qln prphage-Phage or Phophage Related; putative transporter protein                                           |
| SNP | 1656457_T_C    | A388(VGCA_ynfE            | b1587          | probable selenate reductase, periplasmic                                                                                                                         |
| SNP | 1657346_G_A    | G618(GCC_ynfE             | b1587          | probable selenate reductase, periplasmic                                                                                                                         |
| SNP | 1664401_C_T    | V213(AGT_holM             | b1606          | predicted DNA-binding transcriptional regulator                                                                                                                  |
| SNP | 1678839_T_C    | V213(AGT_holM             | b1606          | dihydroneopterin reductase, NADPH-dependent; dihydrofolate reductase isozyme                                                                                     |
| SNP | 1685476_T_C    | A431(GCA_sLumA            | b1612          | lumarate hydratase (lumarase A), aerobic Class I                                                                                                                 |
| SNP | 1687953_G_A    | G293(GCC_ynfD             | b1614          | conserved protein, DUF945 family                                                                                                                                 |
| SNP | 1700311_T_C    | V285(AGT_ald              | b1623          | adenosine deaminase                                                                                                                                              |
| SNP | 1705030_T_C    | V296(AGT_rsaC             | b1629          | electron transport complex protein required for the reduction of SoxR; predicted membrane-associated NADH oxidoreductase                                         |
| DEL | 1711543_1bp    | intergenic (-1:dlpA)gsta  | b1634/b1635    | peptide and tripeptide permease A/glutathione S-transferase                                                                                                      |
| SNP | 1711547_A_G    | intergenic (-1:dlpA)gsta  | b1634/b1635    | peptide and tripeptide permease A/glutathione S-transferase                                                                                                      |
| SNP | 1713748_T_C    | T234(AAC_tyrS             | b1637          | tyrosyl-tRNA synthetase                                                                                                                                          |
| DEL | 1719838_2bp    | coding (493)ycyK          | b1645          | Efflux protein family (PET) component of predicted ynfK efflux pump                                                                                              |
| SNP | 1720701_C_C    | N472(ATC_ynfK             | b1645          | Efflux protein family (PET) component of predicted ynfK efflux pump                                                                                              |
| SNP | 1721498_A_G    | V128(AGT_sodC             | b1646          | superoxide dismutase, Cu, Zn                                                                                                                                     |
| SNP | 1727141_C_T    | I2771(ATC_A1hr            | b1653          | predicted ATP-dependent heliase                                                                                                                                  |
| SNP | 1727315_C_T    | N389(GCC_thr              | b1653          | predicted ATP-dependent heliase                                                                                                                                  |
| SNP | 1727882_C_T    | V524(AGT_thr              | b1653          | predicted ATP-dependent heliase                                                                                                                                  |
| SNP | 1738104_T_C    | R323(CGT_ynfC             | b1660          | predicted transporter                                                                                                                                            |
| SNP | 1749958_C_T    | V360(GTT_ynfH             | b1673          | predicted oxidoreductase                                                                                                                                         |
| SNP | 1751343_C_T    | A130(GCC_ynfH             | b1673          | predicted 4Fe-4S ferroxidase-type protein                                                                                                                        |
| SNP | 1756085_G_A    | intergenic (-1:ymh)ufE    | b1678/b1675    | murein LD-transpeptidase/sulfur acceptor protein                                                                                                                 |
| SNP | 1759563_C_C    | T594(AGC_sufC             | b1682          | component of SufBCD complex; ATP-binding component of ABC superfamily                                                                                            |
| SNP | 1762081_C_T    | E540(GCA_ynfJ             | b1687          | predicted FAD-linked oxidoreductase                                                                                                                              |
| INS | 1765660_INAME1 | coding (251)ycyJ          | b1687          | predicted FAD-linked oxidoreductase                                                                                                                              |
| INS | 1781742_INAME1 | coding (1487)fadK         | b1701          | short chain acyl-CoA synthetase, anaerobic                                                                                                                       |
| SNP | 1782401_A_G    | P846(GCC_sppA             | b1702          | phosphoenolpyruvate synthase                                                                                                                                     |
| SNP | 1786410_A_G    | intergenic (-1:2)hcbA     | b1714/b1715    | beta-lactamase RNA synthetase, alpha subunit/phenylalanyl-tRNA synthetase operon leader peptide                                                                  |
| SNP | 1799034_G_A    | Y254(ATC_Thrs             | b1719          | threonyl-tRNA synthetase                                                                                                                                         |
| INS | 1803261_C_C    | coding (48)7ydf           | b1722          | predicted outer membrane protein, acid-inducible                                                                                                                 |
| SNP | 1803810_C_T    | A128(ATC_ynfN             | b1729          | predicted transporter                                                                                                                                            |
| SNP | 1810636_T_C    | intergenic (-1:ycdJ)cedA  | b1730/b1733    | predicted protein/cell division modulator                                                                                                                        |
| INS | 1811038_INAME1 | intergenic (-1:cedA)katt  | b1731/b1731    | cell division modulator/Catalase HPI, heme d-containing                                                                                                          |
| INS | 1830430_C_C    | coding (778)hbaA          | b1749          | exonuclease III                                                                                                                                                  |
| SNP | 1831135_A_G    | L170(LCA_CyxD             | b1750          | inner membrane protein, TPV38/TMEM64 family                                                                                                                      |
| SNP | 1855003_C_T    | intergenic (-1:ycjJ)ycjJ  | b1773/b1777    | predicted aldolase/predicted oxidoreductase, Zn-dependent and NAD(P)-binding                                                                                     |
| SNP | 1862451_C_T    | G173(GCG_ycyE             | b1781          | aldo-keto reductase, methylglyoxal to acetol, NADPH-dependent                                                                                                    |
| SNP | 1862765_A_G    | A181(GCC_ycyE             | b1784          | conserved protein                                                                                                                                                |
| SNP | 1870836_G_A    | R130(CCG_CycaK            | b1787          | conserved protein                                                                                                                                                |
| DEL | 1876580_1bp    | intergenic (-1:yeaD)yeaG  | b1795/b1795    | conserved protein, UPF0410 family/predicted protein                                                                                                              |
| SNP | 1879613_T_C    | intergenic (-1:emf)dmA    | b1799/b1800    | DNA-binding transcriptional repressor for dmxA/D-malate oxidase, NAD-dependent; probable tartrate dehydrogenase                                                  |
| SNP | 1893901_T_C    | G555(GGT_dmiA             | b1800          | D-malate oxidase, NAD-dependent; probable tartrate dehydrogenase                                                                                                 |
| SNP | 1897961_A_G    | T1851(CAA_dmiA            | b1800          | D-malate oxidase, NAD-dependent; probable tartrate dehydrogenase                                                                                                 |
| SNP | 1881133_T_C    | F286(CTC_ycyW             | b1801          | predicted transporter                                                                                                                                            |
| SNP | 1890484_A_G    | intergenic (-1:yoaA)yoaB  | b1808/b1808    | conserved protein with nucleoside triphosphate hydrolase domain/conserved protein, UPF0076 family                                                                |
| SNP | 1898950_G_A    | intergenic (-1:yoaF)manX  | b1816/b1811    | fused predicted membrane protein/conserved protein/fused mannose-specific PTS enzymes: IIA component/IIIB component                                              |

|     |                 |                         |             |                                                                                                                                                                                                                                                    |
|-----|-----------------|-------------------------|-------------|----------------------------------------------------------------------------------------------------------------------------------------------------------------------------------------------------------------------------------------------------|
| SNP | 1907902_A_G     | P134P(CCA_yybQ          | B1828       | predicted transporter                                                                                                                                                                                                                              |
| SNP | 1925235_T_C     | H279(CAC_rfbB           | B1845       | protease II                                                                                                                                                                                                                                        |
| INS | 1933749_INAMET  | intergenic (-)Fwf/yebK  | B1852/B1853 | glucose-6-phosphate 1-dehydrogenase/predicted DNA-binding transcriptional regulator                                                                                                                                                                |
| SNP | 1935745_T_C     | I291I(ATT_A1)pykA       | B1854       | pyruvate kinase II                                                                                                                                                                                                                                 |
| SNP | 1944629_A_G     | intergenic (-)rcuY/yebC | B1863/B1864 | component of RuvABC resolvase, endonuclease/conserved protein, UPF0082 family                                                                                                                                                                      |
| SNP | 1952001_T_C     | D239N(GAT_ars5          | B1872       | trimethylamine N-oxide reductase system III, catalytic subunit                                                                                                                                                                                     |
| SNP | 1958042_G_A     | D239N(GAT_ars5          | B1876       | arginyl-tRNA synthetase                                                                                                                                                                                                                            |
| SNP | 1967415_T_C     | D265(GAT_tap            | B1885       | methyl-accepting protein IV                                                                                                                                                                                                                        |
| SNP | 1979731_T_C     | D265(GAT_tap            | B1885/B1886 | trimethylamine N-oxide reductase system III, catalytic subunit                                                                                                                                                                                     |
| INS | 1982739_C       | coding (614)/araF       | B1901       | L-arabinose transporter subunit                                                                                                                                                                                                                    |
| SNP | 1991403_T_C     | G154(GGA_uvrC           | B1913       | exonuclease UvrABC, endonuclease subunit                                                                                                                                                                                                           |
| SNP | 2000981_A_G     | pseudogene hfg          | B1936       | predicted defective phage integrase (pseudogene)                                                                                                                                                                                                   |
| SNP | 2029470_T_C     | M223I(ATG_hchA          | B1961       | DNA cytosine methyltransferase                                                                                                                                                                                                                     |
| SNP | 2033727_G_A     | F104I(TTC_ChuH          | B1967       | Glyoxalase III and Hsp31 molecular chaperone                                                                                                                                                                                                       |
| SNP | 2036489_T_C     | I1413(ATC_yeeI          | B1970       | hydroxyisourate hydrolase                                                                                                                                                                                                                          |
| SNP | 2044601_T_C     | Q231E*(CAA_yeeI         | B1978       | probable adhesin                                                                                                                                                                                                                                   |
| SNP | 2049107_C_T     | A307(GCC_shiA           | B1981       | shikimate transporter                                                                                                                                                                                                                              |
| SNP | 2051785_G_A     | noncoding (3)aurW       | B1984       | RNA-Ase                                                                                                                                                                                                                                            |
| SNP | 2052522_C_G     | G130(GGT_nac            | B1988       | DNA-binding transcriptional dual regulator of nitrogen assimilation                                                                                                                                                                                |
| SNP | 2058768_A_G     | G130(GGT_nac            | B1988/B1989 | putative autotransporter and trans-activator                                                                                                                                                                                                       |
| SNP | 2063416_G_A     | intergenic (-)yeeH/inhH | B2029       | glucose 1-phosphate thymidyltransferase                                                                                                                                                                                                            |
| DEL | 2064578_35590bp | pseudogene [yeeE]_wbbJ  | B2460       | [D45]-cb-42 genes(-)b-38-[yeeE], yeeH, yeeA, imd, insD, yeeF, flu, yeeE, yeeI, yeeU, cbaA, yeeW, yeeD, yeeX, yeeA, slmC, dacD, sbcB, yeeD, yeeE, plaI, yeeV, yeeZ, yeeM, hisL, hisG, hisD, hisC, hisH, hisI, hisJ, cld, ugd, gnd, hisI, [wbbJ]/(-) |
| SNP | 2107575_T_C     | T298I(AC_rfbA           | B2029       | glucose 1-phosphate thymidyltransferase                                                                                                                                                                                                            |
| SNP | 2109133_T_C     | S261G(AGC_rfbB          | B2041       | dTPD-glucose 4,6 dehydratase, NAD(P)-binding                                                                                                                                                                                                       |
| SNP | 2117469_T_C     | Y437I(TAC_twaI          | B2047       | predicted UDP-glucose lipid carrier transferase                                                                                                                                                                                                    |
| SNP | 2142340_C_G     | A027(AGC_yegE           | B2067       | predicted diguanylate cyclase, GGDEF domain signaling protein                                                                                                                                                                                      |
| SNP | 2144679_G_A     | T29M(AGC_araA           | B2068       | 3-methyl-adenine DNA glycosylase II                                                                                                                                                                                                                |
| SNP | 2156727_C_T     | T343M(AGC_mtdC          | B2076       | multidrug efflux system, subunit C                                                                                                                                                                                                                 |
| SNP | 2160284_T_C     | V50I(GTA_yneG           | B2086       | phosphatidylyserine kinase, metal-dependent                                                                                                                                                                                                        |
| INS | 2183802_INAMET  | intergenic (-)rcrR/rcrA | B2105/B2106 | DNA-binding transcriptional repressor of rcaM/membrane protein conferring nickel and cobalt resistance                                                                                                                                             |
| SNP | 2183833_T_C     | F151(TTC_CT_rcaN        | B2106       | membrane protein conferring nickel and cobalt resistance                                                                                                                                                                                           |
| SNP | 2183899_T_C     | intergenic (-)rcrM/rcrB | B2106/B2107 | membrane protein conferring nickel and cobalt resistance/periplasmic modulator of Ni and Co efflux                                                                                                                                                 |
| SNP | 2192413_C_T     | L3043(GA_TmetE          | B2116       | predicted HRA synthetase                                                                                                                                                                                                                           |
| SNP | 2199926_T_A     | D808(GAT_yeeH           | B2118       | conserved protein                                                                                                                                                                                                                                  |
| DEL | 2208780_13bp    | coding (837)/yehR       | B2123       | lipoprotein, DUF1307 family                                                                                                                                                                                                                        |
| SNP | 2209982_G_A     | coding (53)/yehT        | B2125       | predicted response regulator in two-component system with YehU                                                                                                                                                                                     |
| SNP | 2213732_A_G     | H300H(CAT_yehX          | B2129       | predicted transporter subunit: ATP-binding component of ABC superfamily                                                                                                                                                                            |
| SNP | 2221259_G_A     | T279H(AC_A_pfbG         | B2134       | D-alanyl-D-alanine endopeptidase                                                                                                                                                                                                                   |
| SNP | 2227264_G_A     | F166(GCC_tduc           | B2140       | RNA-dihydrouridine synthase C                                                                                                                                                                                                                      |
| SNP | 2230162_G_A     | G230(GGC_rfbA           | B2158       | vancomycin high level resistance exclusion protein; mutants have a defective envelope more permeable to vancomycin at 42 degrees                                                                                                                   |
| SNP | 2247282_T_C     | S1145(AGT_yjeH          | B2158       | inner membrane protein, UPF0324 family                                                                                                                                                                                                             |
| INS | 2262740_INAMET  | coding (663)/yixT       | B2174       | Lipid A 1-diphosphate synthase, undecaprenyl pyrophosphate-lipid A 1-phosphate phosphotransferase                                                                                                                                                  |
| SNP | 2269332_G_A     | D940(GAT_rts            | B2176       | pseudogene, auto transporter for phages lambda and N4, when overexpressed                                                                                                                                                                          |
| DEL | 2284189_13bp    | pseudogene yjeJ         | B2190       | pseudogene, auto transporter outer membrane homology/putative transport; Not classified; putative ATP-binding component of a transport system                                                                                                      |
| INS | 2285778_C       | pseudogene yjeD         | B2190       | pseudogene, auto transporter outer membrane homology/putative transport; Not classified; putative ATP-binding component of a transport system                                                                                                      |
| SNP | 2288024_C_G     | R1212I(TAC_yjeK         | B2190       | DNA-binding transcriptional regulator in two-component regulatory system with NaG or NaX                                                                                                                                                           |
| SNP | 2302099_T_C     | intergenic (-)ecoA/mqp  | B2209/B2212 | ecocin, a serine protease inhibitor/malate dehydrogenase, FAD/NAD(P)-binding domain                                                                                                                                                                |
| SNP | 2302212_C_G     | intergenic (-)ecoA/mqp  | B2209/B2212 | ecocin, a serine protease inhibitor/malate dehydrogenase, FAD/NAD(P)-binding domain                                                                                                                                                                |
| SNP | 2307536_G_A     | R32C(CGT_T1nda          | B2213       | fused DNA-binding transcriptional dual regulator/DG-methylguanine-DNA methyltransferase                                                                                                                                                            |
| SNP | 2312629_G_A     | D940(GAT_rts            | B2216       | phosphotransfer intermediate protein in two-component regulatory system with RbCdc                                                                                                                                                                 |
| SNP | 2322417_T_C     | G146(GGT_atoC           | B2223       | short chain fatty acid transporter                                                                                                                                                                                                                 |
| DEL | 2323419_13bp    | coding (871)/rsbB       | B2224       | acetyl-CoA acetyltransferase                                                                                                                                                                                                                       |
| SNP | 2323880_G_A     | D238H(AGC_rfbG          | B2450       | pseudogene, UPF0592 family, putative membrane protein                                                                                                                                                                                              |
| SNP | 2344780_T_C     | RS8H(CGC_C_rhbD         | B2235       | ribonucleoside-diphosphate reductase 1, beta subunit, ferritin-like protein                                                                                                                                                                        |
| SNP | 2349724_A_G     | intergenic (-)gfp7/gfpA | B2240/B2241 | long-glycerol-3-phosphate transporter/long-glycerol-3-phosphate dehydrogenase (anaerobic), large subunit, FAD/NAD(P)-binding                                                                                                                       |
| SNP | 2353189_G_A     | Y149H(TAT_gbcG          | B2243       | anaerobic long-glycerol-3-phosphate dehydrogenase, C subunit, 4Fe-4S iron-sulfur cluster                                                                                                                                                           |
| SNP | 2354624_T_C     | R356I(AGC_amb           | B2253       | undecyl-5-beta-1-thiopyranose phosphoryl-4-oxo-diphosphate aminotransferase, PLP-dependent                                                                                                                                                         |
| INS | 2356208_C       | coding (914)/amcC       | B2254       | undecaprenyl phosphate 1-Ara4FN transferase                                                                                                                                                                                                        |
| DEL | 2368387_13bp    | coding (497)/yibJ       | B2271       | predicted peptidase                                                                                                                                                                                                                                |
| SNP | 2404881_A_G     | R133H(AC_GabaA          | B2290       | valine-pyruvate aminotransferase 2                                                                                                                                                                                                                 |
| SNP | 2409979_C_T     | K126K(AAG_yfbV          | B2295       | inner membrane protein, UPF0208 family                                                                                                                                                                                                             |
| INS | 2424382_INAMET  | coding (647)/yagT       | B2310       | lysine/arginine/ornithine transporter subunit                                                                                                                                                                                                      |
| SNP | 2429982_G_A     | R176C(TAC_T1c0C         | B2315       | functional thiolglyoxylate synthase/dihydrofolate synthase                                                                                                                                                                                         |
| SNP | 2436224_C_T     | G374E(GGG_yfJ           | B2322       | predicted transporter                                                                                                                                                                                                                              |
| SNP | 2440141_T_C     | V253A(GTT_mmmC          | B2324       | fused 5-methylaminopyruvate 2-thiouridine-forming enzyme methyltransferase and FAD-dependent demodification enzyme                                                                                                                                 |
| SNP | 2443940_G_A     | A253P(GCC_ancC          | B2329       | chromatinase                                                                                                                                                                                                                                       |
| SNP | 2447892_G_A     | A136A(GCC_yfca          | B2334       | predicted fibrin-like adhesin protein                                                                                                                                                                                                              |
| INS | 2448797_C       | coding (12/5)/yfrR      | B2335       | predicted fibrin-like adhesin protein                                                                                                                                                                                                              |
| SNP | 2449289_T_C     | N915I(AC_A_yheR         | B2336       | predicted periplasmic pilus chaperone                                                                                                                                                                                                              |
| SNP | 2452974_INAMET  | intergenic (-)yhbA/yhbA | B2339/B2342 | predicted fibrin-like adhesin protein/phosphohistidine phosphatase                                                                                                                                                                                 |
| SNP | 2453556_T_C     | N100I(AAT_G_fadI        | B2341       | fused enoyl-CoA hydratase and epimerase and isomerase/3-hydroxyacyl-CoA dehydrogenase                                                                                                                                                              |
| SNP | 2459885_T_C     | intergenic (-)fadI/yfbF | B2344/B2345 | long-chain fatty acid outer membrane transporter/predicted protein                                                                                                                                                                                 |
| SNP | 2460214_C_G     | intergenic (-)fadI/yfbF | B2344/B2345 | long-chain fatty acid outer membrane transporter/predicted protein                                                                                                                                                                                 |
| SNP | 2464599_G_A     | A369I(GCT_gtrS          | B2352       | serine-specific glucosyl transferase, CP5-53 [KpLE1] prophage                                                                                                                                                                                      |
| SNP | 2484105_A_G     | L836I(TTA_tvvgS         | B2370       | hybrid sensory histidine kinase in two-component regulatory system with EvgA                                                                                                                                                                       |
| SNP | 2484157_T_C     | S843I(TCC_cvgS          | B2370       | hybrid sensory histidine kinase in two-component regulatory system with EvgA                                                                                                                                                                       |
| SNP | 2489626_G_A     | R139I(GCC_yjeE          | B2380       | predicted sensory kinase in two-component system with YjeB                                                                                                                                                                                         |
| SNP | 2498924_C_T     | Q191*(CAG_yjeP          | B2382       | predicted DNA-binding protein                                                                                                                                                                                                                      |
| SNP | 2502349_G_A     | R141H(CGT_yjeP          | B2384       | aminopeptidase                                                                                                                                                                                                                                     |
| SNP | 2509159_G_A     | A246(GCC_mtmH           | B2392       | manganese/divalent cation transporter                                                                                                                                                                                                              |
| SNP | 2513360_T_C     | H566H(CAC_yjeA          | B2395       | predicted diguanylate cyclase                                                                                                                                                                                                                      |
| SNP | 2514376_T_C     | L271I(TCA_C_yjeA        | B2395       | predicted diguanylate cyclase                                                                                                                                                                                                                      |
| SNP | 2517177_T_C     | K240H(AAG_gjR           | B2400       | glutaryl-RNA synthetase                                                                                                                                                                                                                            |
| SNP | 2523314_T_C     | P246P(CCA_yjeB          | B2409       | predicted DNA-binding transcriptional regulator                                                                                                                                                                                                    |
| SNP | 2529347_A_G     | M221A(ATG_yjeZ          | B2413       | predicted inner membrane protein                                                                                                                                                                                                                   |
| SNP | 2541500_G_A     | G116(GGC_yjeA           | B2426       | predicted short-chain oxidoreductase                                                                                                                                                                                                               |
| SNP | 2542111_C_G     | S231I(TCC_CmurB         | B2427       | Repressor for murPD, MurKac, P-9 inducible                                                                                                                                                                                                         |
| SNP | 2544645_T_C     | M250I(ATG_murP          | B2429       | N-acetylmuramic acid permease, EIIBC component, PTS system                                                                                                                                                                                         |
| SNP | 2547423_C_G     | A116(GCC_yjeX           | B2431       | deferrioxalate, cytoplasmic                                                                                                                                                                                                                        |
| INS | 2557383_INAMET  | intergenic (-)yhbZ/yhbZ | B2442/B2444 | CP2-55 prophage; predicted integrase/CP2-55 prophage; predicted protein                                                                                                                                                                            |
| INS | 2557533_C       | coding (53/6)/yflL      | B2443       | CP2-55 prophage; predicted protein                                                                                                                                                                                                                 |
| SNP | 2567072_C_T     | D164N(GAT_eutI          | B2454       | predicted chaperonin, ethanolamine utilization protein                                                                                                                                                                                             |
| SNP | 2574154_G_A     | I483I(ATI_A_maeB        | B2463       | fused malic enzyme predicted oxidoreductase/predicted phosphotransacetylase                                                                                                                                                                        |
| SNP | 2582713_C_T     | L305I(TCC_tcrD          | B2470       | aminoglycoside/multidrug efflux system                                                                                                                                                                                                             |
| SNP | 2586958_G_A     | V714M(GTG_acrD          | B2470       | aminoglycoside/multidrug efflux system                                                                                                                                                                                                             |
| SNP | 2598478_T_C     | C182I(TGT_T1hYhA        | B2481       | hydrogenase 4, 4Fe-4S subunit                                                                                                                                                                                                                      |
| INS | 2599234_C       | coding (155)/yhbB       | B2482       | hydrogenase 4, membrane subunit                                                                                                                                                                                                                    |
| SNP | 2603666_T_C     | S61P(TCC_CyHfE          | B2485       | hydrogenase 4, membrane subunit                                                                                                                                                                                                                    |
| SNP | 2607424_G_A     | T13A(ACC_G_yhH          | B2488       | hydrogenase 4, Fe-S subunit                                                                                                                                                                                                                        |
| SNP | 2609979_G_A     | I270M(TAT_yhbR          | B2491       | DNA-binding transcriptional activator, formate sensing                                                                                                                                                                                             |
| SNP | 2610593_T_C     | D490D(GAT_hyR           | B2491       | DNA-binding transcriptional activator, formate sensing                                                                                                                                                                                             |
| SNP | 2618379_A_G     | intergenic (-)zupp/purM | B2498/B2499 | phosphoribosyltransferase/phosphoribosylaminoimidazole synthetase                                                                                                                                                                                  |
| SNP | 2624882_C_T     | G394(GGT_yjeF           | B2503       | cyclic-di-GMP phosphodiesterase, anaerobic                                                                                                                                                                                                         |
| SNP | 2628064_G_A     | N172A(GCC_yjeI          | B2506       | conserved protein                                                                                                                                                                                                                                  |
| SNP | 2630795_G_A     | A167P(GCC_guaB          | B2508       | IMOP dehydrogenase                                                                                                                                                                                                                                 |
| DEL | 2632452_13bp    | coding (632)/bamB       | B2512       | lipoprotein required for OM biogenesis, in BamABCD complex                                                                                                                                                                                         |
| SNP | 2641836_G_A     | R85C(GCC_T1c0B          | B2518       | multifunctional nucleoside diphosphate kinase and apyrimidinic endonuclease and 3'-phosphodiesterase                                                                                                                                               |
| SNP | 2655740_C_T     | R140R(CGG_hisA          | B2526       | DnaK-like molecular chaperone specific for tsclJ                                                                                                                                                                                                   |
| SNP | 2662132_C_T     | G173G(GCC_yhbR          | B2534       | S9 septilase family protein, function unknown                                                                                                                                                                                                      |
| SNP | 2671662_G_A     | S284I(TCC_T1yph         | B2544       | conserved protein                                                                                                                                                                                                                                  |
| SNP | 2681542_G_A     | A397I(GCC_yjeA          | B2551       | serine hydroxymethyltransferase                                                                                                                                                                                                                    |
| SNP | 2704762_T_C     | G880(GGA_cseC           | B2570       | RseC protein involved in reduction of the SoxR iron-sulfur cluster                                                                                                                                                                                 |
| SNP | 2718105_C_T     | S310I(TCA_T1qI          | B2584       | inhibiting acetyltransferase for acetyl-CoA synthetase                                                                                                                                                                                             |
| SNP | 2719711_T_C     | G454(GCT_yfjQ           | B2584       | inhibiting acetyltransferase for acetyl-CoA synthetase                                                                                                                                                                                             |
| INS | 2731759_INAMET  | coding (500)/yihH       | B2593       | conserved protein, UPF0124 family                                                                                                                                                                                                                  |
| MOB | 2734342         | intergenic (-)bamD/raa  | B2595/B2599 | lipoprotein required for OM biogenesis, in BamABCD complex/cold shock protein associated with 30S ribosomal subunit                                                                                                                                |
| SNP | 2738375_G_A     | I197I(GCT_A1adp         | B2601/B2602 | D-erythro-D-xylose phosphoryl-3-phosphate synthase, lysine-repressible/lipoprotein                                                                                                                                                                 |
| SNP | 2747094_A_G     | W351*(TGG_yjD           | B4461       | inner membrane protein, UPF0583 family                                                                                                                                                                                                             |
| SNP | 2758344_T_C     | C48H(TGT_CyJfI          | B2625       | CP4-57 prophage; predicted protein                                                                                                                                                                                                                 |
| SNP | 2765091_A_G     | C53H(TGT_T1yph          | B2625       | CP4-57 prophage; predicted GTP-binding protein                                                                                                                                                                                                     |
| SNP | 2768023_A_G     | intergenic (-)yhbI/yhbI | B2627/B2628 | CP4-57 prophage; predicted protein/CP4-57 prophage; conserved protein; Phage or Prophage Related                                                                                                                                                   |
| SNP | 2775384_T_C     | N1523D(AAC_yjJ          | B2647       | adhesin-like autotransporter                                                                                                                                                                                                                       |
| SNP | 2776150_T_C     | G1267(GGG_yjeA          | B2647       | adhesin-like autotransporter                                                                                                                                                                                                                       |
| SNP | 2784975_G_A     | pseudogene yjeM         | B2662       | predicted protein; putative enzyme                                                                                                                                                                                                                 |
| SNP | 2789141_G_A     | A215A(GCC_gaH0          | B2661       | succinate-semialdehyde dehydrogenase I, NADP-dependent                                                                                                                                                                                             |
| SNP | 2790102_C_T     | G48G(GCC_gaB1           | B2662       | 4-aminobutyrate aminotransferase, PLP-dependent                                                                                                                                                                                                    |
| SNP | 2790579_G_A     | P207P(GCC_gaB1          | B2662       | 4-aminobutyrate aminotransferase, PLP-dependent                                                                                                                                                                                                    |
| SNP | 2797905_T_C     | intergenic (-)ygaM/nraH | B2672/B2673 | predicted protein/Hydrogen donor for hsdE electron transport system; glutaredoxin-like protein                                                                                                                                                     |
| SNP | 2805944_A_G     | pseudogene ygaY         | B2681       | predicted transporter (pseudogene); putative transport; Not classified; putative transport protein                                                                                                                                                 |
| SNP | 2816785_G_A     | G817(GCC_ahaS           | B2697       | alanyl-tRNA synthetase                                                                                                                                                                                                                             |
| SNP | 2820864_G_A     | S426I(TCC_mraA          | B2699       | DNA strand exchange and recombination protein with protease and nuclease activity                                                                                                                                                                  |
| INS | 2822302_C       | coding (499)/mibB       | B2701       | membrane-bound lytic murein transglycosylase B                                                                                                                                                                                                     |
| SNP | 2831790_A_G     | T219A(ACC_murW          | B2711       | NADH flavin:ubiquinone oxidoreductase                                                                                                                                                                                                              |
| SNP | 2840540_T_C     | G49Y(GCC_T1c0B          | B2718       | protein required for maturation of hydrogenase 3                                                                                                                                                                                                   |
| SNP | 2842426_C_T     | G424S(GCC_hyE           | B2721       | hydrogenase 3, large subunit                                                                                                                                                                                                                       |
| SNP | 2842823_G_A     | A291A(GCC_hyE           | B2721       | hydrogenase 3, large subunit                                                                                                                                                                                                                       |
| SNP | 2850095_G_A     | A246I(GCC_hyD           | B2729       | protein required for maturation of hydrogenases                                                                                                                                                                                                    |
| SNP | 2850570_G_A     | H171I(TGG_T1yph         | B2730       | carbamoyl dehydratase, hydrogenases 1, 2, 3 maturation protein                                                                                                                                                                                     |
| SNP | 2880050_T_C     | H57V(ATT_GyxB           | B2761       | Cas3 predicted helicase needed for Cascade anti-viral activity                                                                                                                                                                                     |
| SNP | 2887104_G_A     | H178I(ACC_C_ued         | B2765       | 6-pyruvoyl tetrahydropteridine synthase (PTPS)                                                                                                                                                                                                     |
| SNP | 2896522_G_A     | A418I(GCC_yjeE          | B2775       | inner membrane protein, predicted transporter                                                                                                                                                                                                      |
| SNP | 2900205_T_C     | intergenic (-)tque/yqcG | B2777/B2781 | carboxy-7-deazaadenine synthase; queosine biosynthesis/expressed protein                                                                                                                                                                           |
| SNP | 2908424_T_C     | H419H(CAC_rimC          | B2785       | 23S rRNA m5U1939 methyltransferase, SAM-dependent                                                                                                                                                                                                  |
| SNP | 2915521_C_T     | I197I(GCT_A1adp         | B2789       | predicted D-glucurate transporter                                                                                                                                                                                                                  |
| INS | 2923099_INAMET  | coding (152)/sdcC       | B2796       | predicted serine transporter                                                                                                                                                                                                                       |
| SNP | 2923910_T_C     | S335P(TCC_C_sdcC        | B2796       | predicted serine transporter                                                                                                                                                                                                                       |
| SNP | 2923397_G_A     | A361I(GCT_huK           | B2803       | L-fucosylase                                                                                                                                                                                                                                       |
| SNP | 2924943_A_G     | H399I(CGC_mba           | B2813       | membrane-bound lytic murein transglycosylase A                                                                                                                                                                                                     |
| INS | 2942350_C       | noncoding (f)metV       | B2816       | RNA-Met                                                                                                                                                                                                                                            |
| SNP | 2942666_G_A     | V292A(GTC_rod           | B2819       | exonuclease V (RecBCD complex), alpha chain                                                                                                                                                                                                        |
| SNP | 2954593_C_T     | H258I(GCC_recC          | B2822       | exonuclease V (RecBCD complex), gamma chain                                                                                                                                                                                                        |
| SNP | 2956636_G_A     | L158I(CTG_TrecC         | B2822       | exonuclease V (RecBCD complex), gamma chain                                                                                                                                                                                                        |
| INS | 2957165_C       | coding (278)/ppdC       | B2823       | predicted protein                                                                                                                                                                                                                                  |
| SNP | 2959882_G_A     | F245I(TTC_T1yph         | B2828       | phosphatidylyserine-oxalophosphoethanol diacylglycerol transferase                                                                                                                                                                                 |
| SNP | 2956449_G_A     | H175G(GG_mdbS           | B2832       | inner membrane protein, UPF0503 family                                                                                                                                                                                                             |
| SNP | 2974608_T_C     | A303A(GCT_hyR           | B2839       | DNA-binding transcriptional dual regulator                                                                                                                                                                                                         |
| SNP | 2979758_G_A     | R172I(GCT_yjeF          | B2844       | predicted acyltransferase                                                                                                                                                                                                                          |
| SNP | 2987213_G_A     | D153N(GAT_ygeH          | B2852       | predicted transcriptional regulator                                                                                                                                                                                                                |
| INS | 2994352_INAMET  | coding (177)/ygeR       | B2865       | novel lipoprotein, function unknown                                                                                                                                                                                                                |
| INS | 2994428_C       | coding (101)/ygeR       | B2865       | novel lipoprotein, function unknown                                                                                                                                                                                                                |
| SNP | 3003503_G_A     | H49I(CAT_T1yph          | B2872       | predicted peptidase                                                                                                                                                                                                                                |
| SNP | 3003001_T_C     | G153G(GGT_yjeY          | B2872       | predicted peptidase                                                                                                                                                                                                                                |
| INS | 3009627_INAMET  | intergenic (-)yqcC/mocA | B2876/B2877 | conserved protein/CTP:molybdopterine cytidyltransferase                                                                                                                                                                                            |
| SNP | 3012684_G_A     | E442I(GAC_yjR           | B2878       | predicted oxidoreductase, Fe-S subunit                                                                                                                                                                                                             |
| SNP | 3013889_A_G     | H71I(ATG_yjK            | B2878       | predicted oxidoreductase, Fe-S subunit                                                                                                                                                                                                             |
| SNP | 3023044_G_A     | M415I(ATG_yjQ           | B4464       | predicted purine permease                                                                                                                                                                                                                          |
| SNP | 3023578_T_C     | L381I(TTA_T1yph         | B2886       | predicted oxidoreductase, 4Fe-4S ferredoxin-type subunit                                                                                                                                                                                           |
| SNP | 3023900_G_A     | F571I(GCC_yjeE          | B2887       | fused predicted oxidoreductase, Fe-S subunit/nucleoside-binding subunit                                                                                                                                                                            |
| SNP | 3030670_G_A     | R98*(CGA_T1yph          | B2891       | peptide chain release factor RF-2                                                                                                                                                                                                                  |
| SNP | 3051424_C_T     | P169S(CCT_fau           | B2912       | conserved protein, 5-formyltetrahydrofolate cyclo-ligase family                                                                                                                                                                                    |
| SNP | 3052912_G_A     | T131I(CAT_araA          | B2914       | ribose-5-phosphate isomerase, constitutive                                                                                                                                                                                                         |
| SNP | 3071788_G_A     | A116A(GCC_yggP          | B4465       | predicted dehydrogenase                                                                                                                                                                                                                            |
| SNP | 3078743_T_A     | D616E(GAT_spaA          | B2938       | biosynthetic arginine decarboxylase, PLP-binding                                                                                                                                                                                                   |

|     |                |                           |             |                                                                                                                                                                                                      |
|-----|----------------|---------------------------|-------------|------------------------------------------------------------------------------------------------------------------------------------------------------------------------------------------------------|
| SNP | 3081809_C_T    | A142(VGCA_mexk            | b2942       | S-adenosylmethionine synthetase                                                                                                                                                                      |
| SNP | 3092128_C_A    | G745(GGC_A_yggf           | b2953       | conserved protease, UPF0235 family                                                                                                                                                                   |
| SNP | 3093341_C_C    | S220(GAGT_vgkM            | b2956       | conserved protein                                                                                                                                                                                    |
| DEL | 3095712_1bp    | coding (591)_yggN         | b2958       | predicted protein                                                                                                                                                                                    |
| SNP | 3096674_C_C    | N470(AAC_C_yg8t           | b2959       | conserved protein, DUF469 family                                                                                                                                                                     |
| SNP | 3096917_A_G    | B187(NCGT_rmti            | b2960       | RNA methyltransferase, SAM-dependent                                                                                                                                                                 |
| SNP | 3104125_G_G    | intergenic (-)speC/vgga   | b2965/b2966 | formin-like decarboxylase, constitutive/predicted inner membrane protein, DUF554 family                                                                                                              |
| SNP | 3105091_C_C    | noncoding (6)phvV         | b2967       | RNA-Phe                                                                                                                                                                                              |
| SNP | 3115501_C_G    | R248(CGCT_rhga            | b2975       | glycylate transporter                                                                                                                                                                                |
| SNP | 3116307_A_G    | intergenic (-)gkA/gldB    | b2975/b2976 | glycolate transporter/malate synthase G                                                                                                                                                              |
| SNP | 3117751_C_T    | N2455(AAT_gldB            | b2976       | malate synthase G                                                                                                                                                                                    |
| SNP | 3124197_C_C    | pseudogene yhcD           | b2981       | pseudogene, DNA-binding transcriptional regulator homology                                                                                                                                           |
| SNP | 3128873_C_A    | G224(GGC_C_yhhV           | b2986       | predicted ATP-binding protein                                                                                                                                                                        |
| INS | 3129030_rNAME? | coding (221)_yghT         | b2986       | predicted ATP-binding protein                                                                                                                                                                        |
| SNP | 3129245_G_A    | E1464(GAA_yghT            | b2986       | predicted ATP-binding protein                                                                                                                                                                        |
| SNP | 3129816_A_G    | V224(GT_C_yhb             | b2987       | phosphate transporter                                                                                                                                                                                |
| SNP | 3139861_A_G    | R360R(CGT_hybO            | b2997       | hydrogenase 2, small subunit                                                                                                                                                                         |
| SNP | 3140914_T      | HQ9(CAT_C_hybO            | b2997       | hydrogenase 2, small subunit                                                                                                                                                                         |
| SNP | 3152015_C_C    | R248(CGCT_rhga            | b3012       | 2,5-diketide-D-glucuronate reductase A                                                                                                                                                               |
| SNP | 3160152_G_A    | N167N(AAC_pacC            | b3019       | DNA topoisomerase IV, subunit A                                                                                                                                                                      |
| INS | 3170470_-C     | coding (216)_yqIA         | b3031       | acyl CoA esterase in vitro                                                                                                                                                                           |
| DEL | 3172183_1bp    | pseudogene nudF           | b3034       | ADP-ribose pyrophosphatase                                                                                                                                                                           |
| SNP | 3176821_C_C    | ARSN(GCA_C_ygdD           | b3029       | predicted diogenase, LigB family                                                                                                                                                                     |
| SNP | 3177383_A_G    | MS2(VATG_csuPT            | b3040       | zinc transporter                                                                                                                                                                                     |
| INS | 3179794_-C     | coding (275)_yqIC         | b3042       | conserved protein                                                                                                                                                                                    |
| SNP | 3182657_A_G    | pseudogene yqgD           | b3046       | pseudogene; outer membrane usher homology/putative membrane; Not classified; putative membrane protein                                                                                               |
| SNP | 3186448_G_A    | Q58*(CAG_T_gq5            | b3049       | predicted glycogen synthesis protein                                                                                                                                                                 |
| DEL | 3188029_1bp    | coding (486)_yqIK         | b3051       | PHB family membrane protein, function unknown                                                                                                                                                        |
| SNP | 3189036_rNAME? | coding (1493)_yqK         | b3051       | PHB family membrane protein, function unknown                                                                                                                                                        |
| SNP | 3195785_C_T    | intergenic (-)y8F/vgM     | b3054/b3055 | predicted adenylate cyclase/adenylate domain protein                                                                                                                                                 |
| SNP | 3202668_A_C    | intergenic (-)ttdB/ttdT   | b3062/b3061 | tartrate dehydratase, beta subunit/L-tartrate/succinate antiporter                                                                                                                                   |
| SNP | 3223480_C_T    | R334(CGC_yjgJ             | b3079       | conserved protein                                                                                                                                                                                    |
| SNP | 3229918_A_G    | G224(GTC_rtmD             | b3084       | 2,3-diketide methyltransferase, SAM-dependent                                                                                                                                                        |
| SNP | 3245842_G_A    | G475(GGT_A_yqIG           | b3102       | predicted S-transferase                                                                                                                                                                              |
| SNP | 3245900_G_A    | S675(AGC_A_tdcF           | b3113       | predicted L-PSF (mRNA) endoribonuclease                                                                                                                                                              |
| INS | 3246019_rNAME? | coding (807)_yqG          | b3118       | DNA-binding transcriptional activator                                                                                                                                                                |
| SNP | 3266929_A_G    | V168A(GTC_garR            | b3125       | tartronate semialdehyde reductase                                                                                                                                                                    |
| SNP | 3270982_A_G    | V341(GTC_garD             | b3128       | (D) galactarate dehydrogenase                                                                                                                                                                        |
| SNP | 3273798_G_A    | G618(GTC_A_hzb            | b3132       | tagatase 6-phosphate aldolase 1, kbzA subunit                                                                                                                                                        |
| SNP | 3275573_C_C    | coding (178)_yqH          | b3132       | N-acetylglucosamine-6-phosphate epimerase, IC component of PTS, fragment (pseudogene); enzyme; Central intermediary metabolism: Amino sugars; PTS system N-acetylglucosamine-specific IC component 2 |
| SNP | 3281518_G_A    | R190N(CGC_agal            | b3141       | galactosamine 6-phosphate isomerase                                                                                                                                                                  |
| SNP | 3285656_G_A    | T721(ACG_yjai             | b3144       | predicted outer membrane protein                                                                                                                                                                     |
| SNP | 3291072_A_G    | G224(GTC_rtmD             | b3149       | DNA-iniator-associating factor for replication initiation                                                                                                                                            |
| SNP | 3295666_C_T    | L971(CTG_CT_yhbT          | b3157       | predicted lipid carrier protein, COG3154 family                                                                                                                                                      |
| SNP | 3304538_G_A    | S4620(CTC_tmp             | b3164       | polynucleotide phosphorylase/polyadenylase                                                                                                                                                           |
| SNP | 3313735_C_C    | T147(AAC_C_yqG            | b3172       | argininosuccinate synthetase                                                                                                                                                                         |
| SNP | 3320512_C_T    | D235(GAC_fmH              | b3178       | protease, ATP-dependent zinc-metallo                                                                                                                                                                 |
| INS | 3323489_rNAME? | intergenic (-)s greA/dacB | b3181/b3182 | transcript cleavage factor/D-alanyl-D-alanine carboxypeptidase                                                                                                                                       |
| DEL | 3323918_1bp    | coding (276)_dacB         | b3182       | D-alanyl-D-alanine carboxypeptidase                                                                                                                                                                  |
| SNP | 3327245_C_C    | K57(KAG_A_yhE             | b3185       | predicted inner membrane permease                                                                                                                                                                    |
| SNP | 3330157_G_A    | R340(CGT_murA             | b3189       | UDP-N-acetylglucosamine 1- carboxyvinyltransferase                                                                                                                                                   |
| INS | 3331348_rNAME? | coding (136)_yrbA         | b3190       | predicted DNA-binding transcriptional regulator, Boka family                                                                                                                                         |
| SNP | 3331774_rNAME? | coding (162)_mlaB         | b3191       | ABC transporter maintaining OM lipid asymmetry, cytoplasmic; STAS component                                                                                                                          |
| DEL | 3331775_1bp    | coding (162)_mlaB         | b3191       | ABC transporter maintaining OM lipid asymmetry, cytoplasmic; STAS component                                                                                                                          |
| INS | 3331775_rNAME? | coding (162)_mlaB         | b3191       | ABC transporter maintaining OM lipid asymmetry, cytoplasmic; STAS component                                                                                                                          |
| SNP | 3332238_G_A    | Y128(ATA_t_mic            | b3192       | ABC transporter maintaining OM lipid asymmetry, periplasmic binding protein                                                                                                                          |
| SNP | 3333211_C_C    | AB8(GGC_C_yheV            | b3196       | predicted calcium/iodium/proton antiporter                                                                                                                                                           |
| SNP | 3341793_A_G    | intergenic (-)ptsN/yhbJ   | b3204/b3205 | sugar-specific enzyme IIA component of PTS(glmZ)RNA-inactivating NTPase, glucosamine-6-phosphate regulated                                                                                           |
| SNP | 3342953_C_C    | intergenic (-)npr/yrbL    | b3206/b3207 | phosphohistidinol-protein-hexose phosphotransferase component of N-regulated PTS system (Npr)/predicted protein                                                                                      |
| INS | 3344817_rNAME? | coding (143)_yhb          | b3207       | predicted biosynthesis protein with amidotransferase-like domain                                                                                                                                     |
| SNP | 3351556_G_A    | G7185(GGC_gldB            | b3212       | glutamate synthase, large subunit                                                                                                                                                                    |
| SNP | 3362330_G_A    | intergenic (-)yhcF/yhcG   | b3219/b3220 | predicted transcriptional regulator/conserved protein                                                                                                                                                |
| SNP | 3363113_C_G    | V212(GTC_yhcG             | b3220       | conserved protein                                                                                                                                                                                    |
| SNP | 3363602_G_A    | A366T(GCC_yhcG            | b3220       | conserved protein                                                                                                                                                                                    |
| SNP | 3366232_G_A    | R341(GCC_nanT             | b3226       | siatic acid transporter                                                                                                                                                                              |
| SNP | 3368618_A_G    | G184(GGT_nanT             | b3226       | DNA-binding transcriptional repressor of the nan operon, induced by siatic acid                                                                                                                      |
| INS | 3373919_C_C    | coding (197)_yhbM         | b3232       | conserved protein with nucleoside triphosphate hydrolase domain                                                                                                                                      |
| SNP | 3379896_C_C    | intergenic (-)argR/yhN    | b3237/b3238 | DNA-binding transcriptional dual regulator, L- arginine-binding/conserved protein                                                                                                                    |
| SNP | 3381013_C_C    | E619(GAA_aaeB             | b3240       | p-hydroxybenzoic acid efflux system component                                                                                                                                                        |
| SNP | 3384682_C_C    | intergenic (-)yhb         | b3243       | transcriptional regulator for aaeKAB operon                                                                                                                                                          |
| SNP | 3391730_T_C    | Y248(CTAC_rmg             | b3247       | ribonuclease G                                                                                                                                                                                       |
| SNP | 3394215_A_G    | G148(GGC_rmcC             | b3250       | cell wall structural complex MreBCD transmembrane component MreC                                                                                                                                     |
| SNP | 3397191_1bp    | coding (143)_yhb          | b3252       | targeting factor for csiBC sRNA degradation                                                                                                                                                          |
| SNP | 3397802_A_G    | S71P(TCC_C_csd            | b3252       | targeting factor for csiBC sRNA degradation                                                                                                                                                          |
| SNP | 3411569_G_A    | G619Q(CAG_acrF            | b3266       | multidrug efflux system protein                                                                                                                                                                      |
| SNP | 3424214_C_T    | I1007(ATT_A_yrdA          | b3279       | conserved protein                                                                                                                                                                                    |
| SNP | 3435540_G_A    | T57(KAC_AT_yqk            | b3285       | RNA polymerase, alpha subunit                                                                                                                                                                        |
| SNP | 3442286_T_C    | G540(CAA_CrpIX            | b3309       | SOS ribosomal subunit protein L24                                                                                                                                                                    |
| SNP | 3449533_C_C    | R182(RAG_a_gpa            | b3323       | general secretory pathway component, cryptic                                                                                                                                                         |
| SNP | 3450913_G_G    | L232(ATA_T_gpc            | b3324       | general secretory pathway component, cryptic                                                                                                                                                         |
| SNP | 3451477_G_C    | A141P(GCC_gspD            | b3325       | general secretory pathway component, cryptic                                                                                                                                                         |
| SUB | 3451477_1bp_CC | coding (421)_gspD         | b3325       | general secretory pathway component, cryptic                                                                                                                                                         |
| SNP | 3455114_C_C    | W138R(TGG_gspG            | b3328       | pseudogenin, cryptic, general secretion pathway                                                                                                                                                      |
| INS | 3474001_G_A    | A18N(GCC_C_yheV           | b4551       | predicted protein                                                                                                                                                                                    |
| SNP | 3476289_G_A    | G1076(GGG_yheS            | b3352       | fused predicted transporter subunits of ABC superfamily-ATP-binding components                                                                                                                       |
| SNP | 3487921_G_A    | D816(GAT_C_FIC            | b4474       | fructoseylase 3-epimerase                                                                                                                                                                            |
| SNP | 3497813_C_C    | T394(CTC_C_csd            | b3374       | fructoseylase 6-kinase                                                                                                                                                                               |
| SNP | 3514908_T_C    | D1595(GAT_hufQ            | b3391       | protein required for the utilization of DNA as a carbon source; fibrillar transporter homolog                                                                                                        |
| SNP | 3548440_G_A    | A226T(GCC_mnM             | b3418       | DNA-binding transcriptional activator for the mal regulon and maltotriose-ATP-binding protein                                                                                                        |
| SNP | 3548311_G_C    | N472(AAC_C_yqG            | b3422       | sigma 54-dependent transcriptional regulator of ricBA expression                                                                                                                                     |
| INS | 3564762_-C     | coding (1238)_yqK         | b3431       | glycogen branching enzyme                                                                                                                                                                            |
| SNP | 3592026_T_C    | Y72(CTAT_T_civK           | b3458       | leucine transporter subunit                                                                                                                                                                          |
| SNP | 3606305_C_C    | A103A(GAC_yhH             | b3473       | inner membrane protein, predicted transporter                                                                                                                                                        |
| SNP | 3606217_G_A    | T56(KAC_AT_yqk            | b3473       | inner membrane protein, predicted transporter                                                                                                                                                        |
| SNP | 3612020_T_C    | L1095(ITA_T_niK           | b3479       | nickel transporter subunit                                                                                                                                                                           |
| INS | 3630694_rNAME? | intergenic (-)yhm/yhn     | b3491/b3492 | inner membrane protein, DUF1323 family/predicted oxidoreductase with FAD(NAD(P))-binding domain                                                                                                      |
| SNP | 3645699_rNAME? | intergenic (-)yhb         | b3505       | predicted protein                                                                                                                                                                                    |
| SNP | 3649664_T_C    | L101P(CTC_C_dcr           | b3507       | predicted DNA-binding transcriptional regulator                                                                                                                                                      |
| SNP | 3659590_C_C    | intergenic (-)gadA/gadX   | b3515/b3516 | transcriptional activator of gadA and gadBC in absence of GaoX/DNA-binding transcriptional dual regulator                                                                                            |
| SNP | 3660491_A_G    | intergenic (-)gadP/gadZ   | b3515/b3516 | DNA-binding transcriptional dual regulator/glutamate decarboxylase A, PL-dependent                                                                                                                   |
| INS | 3663217_C_C    | coding (651)_yJIA         | b3518       | predicted cytochrome C peroxidase                                                                                                                                                                    |
| SNP | 3663565_T_C    | A101A(GCA_yhJA            | b3518       | predicted cytochrome C peroxidase                                                                                                                                                                    |
| SNP | 3663701_C_C    | E566(GAA_G_yhJA           | b3518       | predicted cytochrome C peroxidase                                                                                                                                                                    |
| SNP | 3663563_C_T    | A161A(GCC_ref             | b3519       | cytoplasmic esterase                                                                                                                                                                                 |
| SNP | 3677959_G_A    | T561(ACC_M_dctA           | b3528       | C4-dicarboxylic acid, oxalate and citrate transporter                                                                                                                                                |
| SNP | 3685330_A_G    | S639(CTC_yrbC             | b3532       | regulator of cellulose synthase, cyclic di-GMP binding                                                                                                                                               |
| SNP | 3689213_A_G    | Y128(ATA_T_gpc            | b3532       | cellulose synthase, catalytic subunit                                                                                                                                                                |
| SNP | 3694595_T_C    | intergenic (-)bcg/dtdD    | b3538/b445  | inner membrane protein, predicted endoglucanase, DUF3260 family/toxic polypeptide, small                                                                                                             |
| SNP | 3696739_G_A    | P270L(CCG_dppP            | b3540       | dipeptide transporter                                                                                                                                                                                |
| SNP | 3701088_A_G    | W438R(TGG_dppC            | b3544       | dipeptide transporter                                                                                                                                                                                |
| SNP | 3713008_C_C    | intergenic (-)dhrV/yaf    | b3553/b3554 | gamma-hydroxybutyrate reductase B/conserved protein                                                                                                                                                  |
| SNP | 3738106_T_C    | V232A(GTG_yiak            | b3575       | 2,3-diketide-L-gulonate reductase, NADH-dependent                                                                                                                                                    |
| SNP | 3742796_G_A    | G345(GGC_yiK              | b3580       | L-xylose kinase                                                                                                                                                                                      |
| SNP | 3751210_rNAME? | coding (695)_yrbA         | b3594       | predicted lyase containing HEAT-repeat                                                                                                                                                               |
| SNP | 3763826_A_G    | pseudogene yibW           | b4651       | pseudogene, rhaA-linked                                                                                                                                                                              |
| SNP | 3780719_G_A    | N2615(AAC_gpmM            | b3612       | phosphoglycerate mutase III, cofactor-independent                                                                                                                                                    |
| SNP | 3786661_C_C    | D210(GAAC_hsl             | b3617       | glycine C-acetyltransferase                                                                                                                                                                          |
| SNP | 3791415_G_A    | G253G(GGG_rfaC            | b3621       | ADP-heptose-LPS heptosyl transferase I                                                                                                                                                               |
| SNP | 3798000_T_C    | L272(CTA_C_rfaB           | b3628       | UDP-D-galactose:glucosyl(1)populosaccharide-1, 6-D galactosyltransferase                                                                                                                             |
| SNP | 3801476_C_T    | M90N(ATA_A_rag            | b3631       | glucosyltransferase I                                                                                                                                                                                |
| SNP | 3802400_C_C    | T136(GAC_A_rfaQ           | b3632       | trypoglyosaccharide core biosynthesis protein                                                                                                                                                        |
| SNP | 3804104_T_C    | V296A(GTC_waaA            | b3633       | 3-deoxy-D-manno-oxulosonic acid transferase (KDO transferase)                                                                                                                                        |
| SNP | 3820271_G_C    | M128N(ATA_rmcG            | b3652       | ATP-dependent DNA helicase                                                                                                                                                                           |
| SNP | 3827887_C_C    | H514(GTC_rmcI             | b3652       | predicted alpha-glucosidase                                                                                                                                                                          |
| SNP | 3847963_C_T    | intergenic (-)yhbL/ttdB   | b3672/b416  | Hsp68 operon leader peptide/lexA-regulated toxic peptide involved in persister formation; membrane peptide that decreases proton motive force and ATP levels                                         |
| SNP | 3873773_G_A    | S342T(CTC_T_yrbP          | b3699       | DNA gyrase, subunit B                                                                                                                                                                                |
| SNP | 3881801_G_A    | R236(CTC_C_rmcH           | b3707       | hyphoplasman leader peptide                                                                                                                                                                          |
| SNP | 3888115_C_T    | L225(CTG_T_hzJ            | b3711       | predicted DNA-binding transcriptional regulator                                                                                                                                                      |
| SNP | 3892611_G_A    | G143E(GGA_cbrB            | b3716       | inner membrane protein, creBC regulon                                                                                                                                                                |
| SNP | 3893912_C_C    | K34E(AAG_C_yieK           | b3718       | predicted 6-phosphoglucomutase                                                                                                                                                                       |
| SNP | 3904573_G_A    | I168(ATA_C_yieK           | b3727       | phosphate transporter subunit                                                                                                                                                                        |
| SNP | 3919976_C_T    | L112L(CTG_C_mmmG          | b3741       | S-methylamionomethyl-2-thiouridine modification at tRNA U34                                                                                                                                          |
| SNP | 3921055_C_T    | E27K(GAA_A_micC           | b3742       | FMN-binding protein MicC                                                                                                                                                                             |
| INS | 3926212_rNAME? | coding (238)_hup          | b3747       | potassium transporter                                                                                                                                                                                |
| SNP | 3938090_C_T    | intergenic (-)mrcG/glu    | b3756/b3755 | ribosomal RNA of rmc operon/tRNA-Glu                                                                                                                                                                 |
| SNP | 3951956_C_T    | V209V(GTG_hvY             | b3773       | DNA-binding transcriptional dual regulator                                                                                                                                                           |
| SNP | 3953451_C_T    | G286R(GGC_dppC            | b3774       | keton-acid reductoisomerase, NAD(P) binding                                                                                                                                                          |
| SNP | 3954807_G_A    | G130V(GGC_wzE             | b3785       | Enterobacterial Common Antigen (ECA) polysaccharide chain length modulation protein                                                                                                                  |
| SNP | 3972122_C_T    | G389G(GGC_wzE             | b3792       | O-antigen transferase                                                                                                                                                                                |
| SNP | 3972451_C_T    | H83N(CTC_C_HTF            | b4481       | TDP-FucNAc:lipidII-FucNAc transferase                                                                                                                                                                |
| SNP | 3982862_C_T    | L161L(CTG_T_hemX          | b3803       | predicted uracilphosphorylase III methyltransferase                                                                                                                                                  |
| SNP | 3985036_C_C    | A137T(GTC_hemC            | b3805       | hydroxymethylbilane synthase                                                                                                                                                                         |
| INS | 4002416_-C     | intergenic (-)hrcQ/rhcT   | b3822/b3823 | ATP-dependent DNA gyrase/threonine efflux pump                                                                                                                                                       |
| SNP | 40210915_C_G   | T87A(GC_AC_ygpP           | b3834       | conserved protein, SCF2 family                                                                                                                                                                       |
| SNP | 4042354_C_T    | intergenic (-)yhbA/yhbI   | b3865/b3866 | GTP-binding protein required for normal cell division/activator of Der GTPase                                                                                                                        |
| DEL | 4051578_1bp    | intergenic (-)ytpA/yhbI   | b3871/b3872 | GTP-binding protein/predicted DNA-binding transcriptional regulator                                                                                                                                  |
| SNP | 4060606_C_C    | intergenic (-)ytdQ/yhbR   | b3871/b3872 | alpha-glucosidase/predicted aldose-1-epimerase                                                                                                                                                       |
| SNP | 4062363_C_T    | W222*(TTC_yhbT            | b3881       | predicted aldolase                                                                                                                                                                                   |
| SNP | 4064595_A_G    | S95P(TCC_C_yihU           | b3882       | gamma-hydroxybutyrate dehydrogenase, NADH-dependent                                                                                                                                                  |
| SNP | 4088183_C_C    | D191(GCAC_rhaB            | b3904       | hamulokinase                                                                                                                                                                                         |
| SNP | 4107591_C_C    | A54V(GTC_C_ygpD           | b3923       | stress-induced protein                                                                                                                                                                               |
| SNP | 4106697_T_C    | A63A(GCA_G_ygpX           | b3925       | fructose 1,6-bisphosphatase II                                                                                                                                                                       |
| SNP | 4112687_C_T    | A123T(CTC_huJ             | b3931       | molecular chaperone and ATPase component of HspU/Protein                                                                                                                                             |
| SNP | 4120186_C_C    | T731(ACT_A_methB          | b3939       | cystathionine gamma-synthase, PLP-dependent                                                                                                                                                          |
| SNP | 4137048_C_C    | D831(ATC_A_hfD            | b3951       | predicted formate acetyltransferase 2 (pyruvate lyase II)                                                                                                                                            |
| SNP | 4148762_G_A    | T203A(ACG_argH            | b3960       | argininosuccinate lyase                                                                                                                                                                              |
| SNP | 4166153_A_G    | R60R(CTG_C_oaaB           | b3974       | paritiothate kinase                                                                                                                                                                                  |
| SNP | 4211113_T_G    | noncoding (5)_ybv         | b4008       | RNA-Glu                                                                                                                                                                                              |
| SNP | 4207574_C_T    | A264V(GCC_aceB            | b4019       | malate synthase A                                                                                                                                                                                    |
| SNP | 4225208_C_C    | M409V(ATG_rgi             | b4025       | glycosephosphate isomerase                                                                                                                                                                           |
| SNP | 4234883_G_A    | A500V(GCC_mafF            | b4033       | maltose transporter subunit                                                                                                                                                                          |
| SNP | 4243819_A_G    | H3R(CAC_CG_ubiC           | b4039       | chorismate-pyruvate lyase                                                                                                                                                                            |
| SNP | 4260633_C_T    | intergenic (-)yib5/aphA   | b4621/b4055 | hypothetical protein/acid phosphatase/phosphotransferase, class B, non-specific                                                                                                                      |
| SNP | 4265154_C_A    | GR6(GGC_Gr_vra            | b4058       | ATPase and DNA damage recognition protein of nucleotide excision repair excinuclease UvrABC                                                                                                          |
| INS | 4292049_rNAME? | intergenic (-)yrbK/yidC   | b4063/b4064 | DNA-binding transcriptional dual regulator, Fe-C center for redox-sensing/predicted permease                                                                                                         |
| SNP | 4275252_C_T    | A319A(GGC_aacP            | b4067       | acetate transporter                                                                                                                                                                                  |
| SNP | 4280860_C_C    | Y104N(CTC_rnfB            | b4071       | nitrite reductase, formate-dependent, penta-heme cytochrome c                                                                                                                                        |
| SNP | 4281388_C_T    | G56(GGC_rnfC              | b4072       | formate-dependent nitrite reductase, 4Fe-4S subunit                                                                                                                                                  |
| SNP | 4283239_G_A    | R124H(GCC_nrfE            | b4074       | heme lyase (NrfE)G for insertion of heme into c552, subunit NrfE                                                                                                                                     |
| INS | 4287886_rNAME? | intergenic (-)yrbP/yidC   | b4077/b4078 | glutamate/aspartate proton symporter/conserved protein                                                                                                                                               |
| SNP | 42882715_C_C   | T532R(CTC_rnfH            | b4079       | formate dehydrogenase-H, selenopolypeptide subunit                                                                                                                                                   |
| SNP | 4289091_A_G    | W528R(TGG_rnfH            | b4079       | formate dehydrogenase-H, selenopolypeptide subunit                                                                                                                                                   |
| SNP | 4325404_A_G    | V488A(GTT_espA            | b4114       | predicted metal dependent hydrolase                                                                                                                                                                  |

|     |                |                         |             |                                                                                                                              |
|-----|----------------|-------------------------|-------------|------------------------------------------------------------------------------------------------------------------------------|
| DEL | 4325457_1bp    | coding (1440) epfA      | b4114       | predicted metal dependent hydrolase                                                                                          |
| SNP | 4349100_A_G    | L2751ATC_A_adaA         | b4211       | lyxine decarboxylase, acid-inducible                                                                                         |
| SNP | 4355497_G_A    | G2846GGC_dsdD           | b4136       | fused thiol:disulfide interchange protein; activator of DsbC/conserved protein                                               |
| SNP | 4358824_C_T    | A270AGCG_aspA           | b4139       | aspartate ammonia-lyase                                                                                                      |
| SNP | 4373280_A_G    | R748(GGT_C)trdA         | b4154       | fumarate reductase (anaerobic) catalytic and NAD/flavo-protein subunit                                                       |
| SNP | 4374714_C_T    | R256GGT_vjyA            | b4155       | EF-P-lysinyl-lysine ligase                                                                                                   |
| SNP | 4398757_A_G    | L266(LTTA_T)mir         | b4179       | exoribonuclease R, RNase R                                                                                                   |
| SNP | 4400788_A_G    | r70W(ATT_GT)rimB        | b4180       | 23S rRNA (Gm2251)-methyltransferase                                                                                          |
| SNP | 4411014_C_T    | intergenic (-)idgA/dubA | b4150/b4191 | L-ascorbate 6-phosphate lactonase/L-ascorbate-specific enzyme IIC component of PTS                                           |
| SNP | 4413069_C_T    | A19V(GCA_G)uacA         | b4195       | L-ascorbate-specific enzyme IA component of PTS                                                                              |
| SNP | 4419228_A_G    | pseudogene yfA          | b4205       | pseudogene, related to transcriptional regulators                                                                            |
| SNP | 4423612_A_G    | G658(CAC_C)yhH          | b4212       | predicted transcriptional regulator, HcIIr-type, DUF24 family                                                                |
| SNP | 4438800_A_G    | V961(VCTA_v)hN          | b4221       | large conserved protein, DUF450 family                                                                                       |
| DEL | 4447073_1bp    | intergenic (-)fbp/nplI  | b4232/b4233 | fructose-1,6-bisphosphatase I/UDP-N-acetylmuramate-L-alanyl-gamma-D-glutamyl-meso-diaminopimelate lyase                      |
| SNP | 4448855_T_G    | N106T(AAC_C)vjyA        | b4234       | conserved protein, ribosome-associated                                                                                       |
| INS | 4471270_#NAME? | pseudogene vjgM         | b4257       | inner membrane protein, DUF658 family                                                                                        |
| SNP | 4473728_A_G    | V472A(GTT_v)alsI        | b4258       | valyl-tRNA synthetase                                                                                                        |
| SNP | 4474935_C_T    | G705(GGC_A)valS         | b4258       | valyl-tRNA synthetase                                                                                                        |
| SNP | 4482671_C_T    | S387(NAG_C)nitT         | b4265       | L-lysine and D-glucamate transporter                                                                                         |
| SNP | 4491422_C_C    | pseudogene vjgX         | b4575       | KpLE2 phage-like element; predicted protein, C-ter fragment (pseudogene)                                                     |
| SNP | 4503345_C_T    | L125(LITG_T)ecdD        | b4288       | KpLE2 phage-like element; iron-dicitrate transporter subunit                                                                 |
| SNP | 4512640_C_T    | G229(GGG_v)hF           | b4296       | KpLE2 phage-like element; predicted transporter                                                                              |
| SNP | 4513876_C_T    | G508(GGG_v)hG           | b4297       | KpLE2 phage-like element; predicted dehydratase                                                                              |
| SNP | 4523281_G_A    | intergenic (-)sgcX/yjyH | b4305/b4356 | KpLE2 phage-like element; predicted endoglucanase with Zn-dependent exopeptidase domain/pseudogene, novel zinc finger family |
| SNP | 4528939_C_C    | intergenic (-)nanS/nanM | b4309/b4310 | 9-O-acetyl-N-acetylneuraminic acid esterase/N-acetylneuraminic acid mutarotase                                               |
| INS | 4541716_#NAME? | coding (886) gntP       | b4321       | fructuronate transporter                                                                                                     |
| DEL | 4544240_1bp    | coding (351) uxuB       | b4323       | D-mannonate oxidoreductase, NAD-dependent                                                                                    |
| INS | 4548065_#NAME? | intergenic (-)yjiK/radD | b4325/b4326 | predicted protein/Rps stabilizer after DNA damage, anti-RssB factor                                                          |
| SNP | 4550091_A_G    | L3551(ATT_A)vjyM        | b4335       | predicted 2-hydroxyglutaryl-CoA dehydratase                                                                                  |
| SNP | 4564710_C_T    | pseudogene yjT          | b4342       | pseudogene                                                                                                                   |
| SNP | 4564845_C_T    | pseudogene yjT          | b4342       | pseudogene                                                                                                                   |
| SNP | 4569673_T_G    | P323P(CCG_m)crB         | b4346       | 5-methylcytosine-specific restriction enzyme McrBC subunit McrB                                                              |
| SNP | 4578853_G_A    | G3015(GGC_m)rr          | b4351       | methylated adenine and cytosine restriction protein                                                                          |
| SNP | 4580254_A_G    | Y44H(ATT_C)vjyX         | b4353       | conserved protein                                                                                                            |
| SNP | 4590564_A_G    | intergenic (-)opgB/yjyA | b4359/b4366 | phosphoglycerol transferases I and II/conserved protein                                                                      |
| SNP | 4590910_C_C    | intergenic (-)opgB/yjyA | b4359/b4366 | phosphoglycerol transferases I and II/conserved protein                                                                      |
| INS | 4597390_#NAME? | noncoding (8)leuP       | b4368       | tRNA-Leu                                                                                                                     |
| INS | 4597511_#NAME? | noncoding (8)leuP       | b4369       | tRNA-Leu                                                                                                                     |
| INS | 4597626_#NAME? | noncoding (8)leuQ       | b4370       | tRNA-Leu                                                                                                                     |
| DEL | 4597627_1bp    | noncoding (7)leuQ       | b4370       | tRNA-Leu                                                                                                                     |
| SNP | 4600543_C_T    | H158H(CAC_v)jyG         | b4374       | dUMP phosphatase                                                                                                             |
| INS | 4600633_+C     | intergenic (+)yjiG/prfC | b4374/b4375 | dUMP phosphatase/peptide chain release factor RF-3                                                                           |
| SNP | 4601280_T_C    | V191(VTAT_T)prfC        | b4375       | peptide chain release factor RF-3                                                                                            |
| SNP | 4606903_G_A    | G489G(GGC_v)jyI         | b4380       | conserved protein                                                                                                            |
| SNP | 4612348_A_G    | K54K(AAA_A)deoD         | b4384       | purine-nucleoside phosphorylase                                                                                              |
| SNP | 4612459_C_T    | S915(TCC_TC)deoD        | b4384       | purine-nucleoside phosphorylase                                                                                              |
| SNP | 4613568_C_T    | R166*(CGA_v)jyI         | b4385       | HipA family protein                                                                                                          |
| SNP | 4614026_A_G    | G318Q(CAA_v)jyI         | b4385       | HipA family protein                                                                                                          |
| SNP | 4614061_T_C    | V330A(IGT_v)jyI         | b4385       | HipA family protein                                                                                                          |
| SNP | 4615538_C_T    | G1865(GGC_m)B           | b4387       | conserved membrane protein                                                                                                   |
| SNP | 4621836_C_T    | intergenic (-)yjiK/alt  | b4391/b4392 | fused predicted transporter subunits of ABC superfamily; ATP-binding components/lytic murein transglycosylase, soluble       |
| SNP | 4623593_C_T    | S528S(AGC_v)ilt         | b4392       | lytic murein transglycosylase, soluble                                                                                       |
| SNP | 4629474_A_G    | intergenic (+)creC/creD | b4399/b4400 | xylose isomerase in two-component regulatory system with CreB or PhoB, regulator of the CreC regulon/inner membrane protein  |
| INS | 4630868_#NAME? | intergenic (+)creC/arcA | b4400/b4401 | inner membrane protein/DNA-binding response regulator in two-component regulatory system with ArcB or CpxA                   |
