# Supplementary material for: Chance and necessity in the genome evolution of endosymbiotic bacteria of insects
Source: PubMed Central journal article supplement (PMC5437351; doi:10.1038/ismej.2017.18), 2017-03-21
Supplement: ismej201718x3.pdf [file ismej201718x3.pdf]

|     |        |       |                           |            |                     |      |       |      |                                                                                                                     |
|-----|--------|-------|---------------------------|------------|---------------------|------|-------|------|---------------------------------------------------------------------------------------------------------------------|
| SNP | 548883 | T→G   | T141(AAC→CCC)             | ppib       | b0525               | G    | G     | G    | peptidyl prolyl cis-trans isomerase B (rotamase B)                                                                  |
| SNP | 550576 | T→C   | N918(AAC→AGC)             | cvyB       | b0526               | G    | G     | G    | cytosine deaminase                                                                                                  |
| SNP | 569031 | A→C   | L70F(TTA→TTC)             | quidD      | b0551               | C    | C     | C    | DLF12 prophage; predicted antitermination protein                                                                   |
| SNP | 572708 | A→C   | K771(AAA→ACA)             | rrdD       | b0555               | C    | C     | C    | DLF12 prophage; predicted lysoczyme                                                                                 |
| SNP | 576479 | T→G   | pseudogene (1867/44 nt)   | aaad       | b4634               | -    | -     | -    | DLF12 prophage; predicted tail fiber assembly protein (pseudogene)/Phase or Prophage Related                        |
| SNP | 576921 | T→G   | pseudogene (702/744 nt)   | aaad       | b4634               | -    | -     | -    | DLF12 prophage; predicted tail fiber assembly protein (pseudogene)/Phase or Prophage Related                        |
| SNP | 578302 | T→G   | intergenic (+376/245)     | ftaf/afpp  | b0565/b0564         | -    | -     | -    | pseudogene; DUF12 prophage/Phase or Prophage Related/DNA-binding globulin transcriptional activator; DUF12 prophage |
| SNP | 579576 | A→C   | T246(AAC→AAC)             | ompt       | b0565               | C    | C     | C    | DLF12 prophage; outer membrane protease VII (outer membrane protein 3b)                                             |
| SNP | 580908 | A→C   | intergenic (409/15)       | ompt/paubD | b0565/b4635         | C    | C     | C    | DLF12 prophage; outer membrane protease VII (outer membrane protein 3b)/RNA-OTHER                                   |
| SNP | 590201 | A→G   | Y378(TAC→CAC)             | curR       | b0571               | G    | G     | G    | DNA-binding response regulator in two-component regulatory system with CusC                                         |
| SNP | 590646 | A→C   | intergenic (+164/22)      | curC       | b0572               | G    | G     | G    | copper/silver efflux system; outer membrane component                                                               |
| SNP | 598592 | T→G   | E313(AAG→GCG)             | musM       | b0577               | G    | G     | G    | mechanosensitive channel protein, miniconductance                                                                   |
| DEL | 600982 | Δ1bp  | coding (84/249 nt)        | ybcJ       | b0580               | Δ1bp | Δ1bp  | Δ1bp | predicted inner membrane protein                                                                                    |
| SNP | 601099 | C→T   | intergenic (364/329)      | yskY/ydkb  | b0580/b0581         | T    | T     | T    | predicted membrane protein/weak gamma glutamylcysteine ligase                                                       |
| SNP | 606469 | T→G   | K238(AAA→CAA)             | fcpA       | b0584               | G    | G     | G    | iron-entrobactin outer membrane transporter                                                                         |
| SNP | 614728 | A→C   | F113C(TT→TGT)             | fcpC       | b0588               | -    | -     | -    | iron-entrobactin transporter subunit                                                                                |
| SNP | 616689 | T→C   | I333(TAC→GTC)             | fcpD       | b0590               | -    | -     | -    | iron-entrobactin transporter subunit                                                                                |
| SNP | 618132 | T→C   | W323(TGG→GCG)             | ens5       | b0591               | C    | C     | C    | entrobactin exporter; iron-regulated                                                                                |
| SNP | 626219 | A→C   | V209(GTT→GCT)             | ybmX       | b0601               | C    | C     | C    | conserved protein                                                                                                   |
| SNP | 632821 | T→G   | K207(AAA→CAA)             | dsuG       | b0604               | G    | G     | G    | thio/diulfate interchange protein, periplasmic                                                                      |
| SNP | 642780 | A→G   | V414(GTC→GCC)             | cxk        | b0614               | G    | G     | G    | apo-citrate lyase phosphoribosyl-dephospho-CoA transferase                                                          |
| SNP | 644173 | A→G   | A208(ACT→GCC)             | ene        | b0616               | G    | G     | G    | citrate lyase, citryl-ACP lyase (beta) subunit                                                                      |
| SNP | 647509 | A→C   | T374(AAC→GCT)             | dsb        | b0619               | G    | G     | G    | sensory histidine kinase in two-component regulatory system with c8B                                                |
| SNP | 649988 | T→G   | I283(ATT→ACT)             | dcuC       | b0621               | -    | -     | -    | anaerobic C4-dicarboxylate transport                                                                                |
| SNP | 650732 | C→T   | G255(GCC→GAC)             | dcuE       | b0622               | -    | -     | -    | anaerobic C4-dicarboxylate transport                                                                                |
| SNP | 650825 | A→G   | F41(TTC→CTC)              | dcuC       | b0621               | -    | -     | -    | anaerobic C4-dicarboxylate transport                                                                                |
| SNP | 655195 | A→G   | S195(TCC→CCC)             | ybeF       | b0629               | G    | G     | G    | predicted DNA-binding transcriptional regulator                                                                     |
| SNP | 658673 | C→T   | D596(GAC→GAC)             | daaA       | b0632               | T    | T     | T    | D-allyl-D-alanine carbonyltransferase (penicillin-binding protein 5)                                                |
| SNP | 665284 | T→G   | NS27(AAC→ACC)             | nadD       | b0639               | G    | G     | G    | nicotinic acid mononucleotide adenyltransferase, NAD(P)-dependent                                                   |
| SNP | 666711 | A→C   | D821(GAT→GAG)             | lptE       | b0641               | C    | C     | C    | LPS assembly OM complex LptE, lipoprotein component                                                                 |
| SNP | 676859 | A→C   | H314(AAC→GAC)             | hscC       | b0650               | G    | G     | G    | Hsp70 family chaperone Hsc62; binds to RpoD and inhibits transcription                                              |
| SNP | 677325 | A→G   | V512(GTG→GGC)             | hscC       | b0650               | G    | G     | G    | Hsp70 family chaperone Hsc62; binds to RpoD and inhibits transcription                                              |
| INS | 685462 | +CAC  | coding (280/1539 nt)      | int        | b0657               | -    | -     | +CAC | apoptoprotein N acetyltransferase                                                                                   |
| DEL | 696274 | Δ1bp  | intergenic (136/24)       | fldA/ybfE  | b0676               | Δ1bp | Δ1bp  | Δ1bp | DNA-binding transcriptional regulator; repressor of N-acetylglucosamine                                             |
| SNP | 706447 | A→G   | intergenic (114/24)       | fldA/ybfE  | b0684/b0685         | G    | G     | G    | flavodoxin I/LexA-regulated conserved protein                                                                       |
| SNP | 710995 | A→C   | pseudogene (469/651 nt)   | yBg        | b0691               | -    | -     | -    | pseudogene                                                                                                          |
| SNP | 711869 | A→G   | pseudogene (197/255 nt)   | ybfE       | b0692               | -    | -     | -    | putrescine/putrescine symporter; putrescine/ornithine antiporter                                                    |
| SNP | 712265 | T→G   | L289(TAC→GCT)             | potE       | b0692               | G    | G     | G    | putrescine/putrescine symporter; putrescine/ornithine antiporter                                                    |
| SNP | 723250 | A→C   | S171(TAC→GCT)             | kdpA       | b0698               | C    | C     | C    | potassium translocating ATPase, subunit A                                                                           |
| SNP | 730296 | T→C   | pseudogene (1311/1434 nt) | ybfE       | b0711               | -    | -     | -    | pseudogene; rfs-like                                                                                                |
| SNP | 730480 | T→C   | pseudogene (1395/1434 nt) | ybfD       | b0703               | -    | -     | -    | pseudogene; rfs-like                                                                                                |
| SNP | 730627 | A→G   | T38A(ACT→GCT)             | ybcJ       | b0704               | G    | G     | G    | predicted protein                                                                                                   |
| DEL | 730631 | Δ1bp  | coding (116/670 nt)       | ybcJ       | b0704               | -    | -     | -    | Δ1bp                                                                                                                |
| SNP | 731439 | T→C   | pseudogene (129/255 nt)   | ybfQ       | b4514               | C    | C     | C    | pseudogene; H repeat associated protein                                                                             |
| SNP | 734949 | A→C   | K178(AAA→AAG)             | phr        | b0708               | -    | -     | -    | deoxyriboflavin photolyase, FAD-binding                                                                             |
| SNP | 735117 | C→T   | S322(AAC→AAT)             | phr        | b0708               | -    | -     | -    | deoxyriboflavin photolyase, FAD-binding                                                                             |
| SNP | 735632 | A→C   | L420(TAC→CTC)             | phr        | b0708               | -    | -     | -    | deoxyriboflavin photolyase, FAD-binding                                                                             |
| SNP | 738564 | A→C   | intergenic (124/24)       | ybfE       | b0711               | -    | -     | -    | predicted enzyme subunit                                                                                            |
| SNP | 749576 | A→C   | intergenic (242/467)      | glx/ybcH   | b0720/b0721         | C    | C     | C    | citrate synthase/succinate dehydrogenase, membrane subunit; binds cytochrome b556                                   |
| SNP | 749952 | A→C   | intergenic (618/91)       | glx/ybcH   | b0720/b0721         | -    | -     | -    | citrate synthase/succinate dehydrogenase, membrane subunit; binds cytochrome b556                                   |
| SNP | 753344 | A→C   | E304(AAC→GAC)             | sdhB       | b0724               | G    | G     | G    | succinate dehydrogenase, membrane subunit; binds cytochrome b556                                                    |
| SNP | 752576 | T→G   | Y80(TAT→GAT)              | sdhB       | b0724               | G    | G     | G    | succinate dehydrogenase, Fe/S subunit                                                                               |
| SNP | 755678 | T→G   | S703(TCT→GCT)             | suaA       | b0726               | -    | -     | -    | 2-oxoglutarate decarboxylase, thiamin requiring                                                                     |
| SNP | 756150 | A→G   | intergenic (140/24)       | suaA       | b0726               | -    | -     | -    | 2-oxoglutarate decarboxylase, thiamin requiring                                                                     |
| SNP | 761532 | A→C   | E228(AAG→ACA)             | mngA       | b0731               | -    | -     | -    | fused 2-O-alpha-mannosyl-D-glycerate specific P15 enzymes: IIA component/IIA component/IIIC component               |
| SNP | 762940 | A→C   | N338(AAT→CAT)             | mngB       | b0732               | -    | -     | -    | alpha-mannosidase                                                                                                   |
| SNP | 763656 | A→C   | E212(AAC→GAC)             | mngB       | b0732               | -    | -     | -    | alpha-mannosidase                                                                                                   |
| SNP | 766030 | G→A   | intergenic (+553/294)     | mngB/cyD4  | b0732/b0733         | A    | A     | A    | alpha-mannosidase/cytochrome d terminal oxidase, subunit I                                                          |
| SNP | 772416 | A→G   | P350F(CAC→CCG)            | toaA       | b0739               | -    | -     | -    | membrane anchored protein in ToxA/ToL/ToK complex                                                                   |
| SNP | 773181 | T→C   | Y240(TAC→CAC)             | ybfF       | b0742               | C    | C     | C    | periplasmic ToxB binding protein                                                                                    |
| SNP | 778914 | A→G   | V258A(GTG→GGC)            | zifB       | b0752               | G    | G     | G    | zinc efflux system                                                                                                  |
| SNP | 784908 | A→C   | F250V(TTC→GTC)            | galk       | b0757               | -    | -     | -    | galactokinase                                                                                                       |
| DEL | 787967 | Δ44bp | coding (645/644/473 nt)   | modE       | b0761               | G    | Δ44bp | G    | predicted malylate transporter subunits of ABC superfamily; ATP-binding components                                  |
| SNP | 789065 | A→G   | V148A(GTC→GCC)            | modE       | b0761               | G    | G     | G    | DNA-binding transcriptional repressor for the molybdenum transport operon modABC                                    |
| SNP | 793151 | T→G   | intergenic (54/101)       | ybfA/ygfJ  | b0766/b0767         | -    | -     | -    | pyruvate kinase                                                                                                     |
| SNP | 797400 | T→G   | I404(TAT→GAT)             | ybfA/ygfJ  | b0766/b0767         | -    | -     | -    | predicted transporter                                                                                               |
| SNP | 800831 | T→G   | intergenic (+201/438)     | ybfJ/ybcH  | b0771/b0772         | -    | -     | -    | predicted hydratase/acyl-CoA thioesterase, lipoprotein                                                              |
| SNP | 802773 | T→G   | intergenic (1977/103)     | ybcZ/cj    | b0772/plamid_gene01 | -    | -     | -    | acyl-CoA thioesterase, lipoprotein/phage lambda repressor protein C1                                                |
| SNP | 802776 | T→G   | intergenic (1977/103)     | ybcZ/cj    | b0772/plamid_gene01 | -    | -     | -    | acyl-CoA thioesterase, lipoprotein/phage lambda repressor protein C1                                                |
| SNP | 802784 | A→C   | intergenic (988/90)       | ybcZ/cj    | b0772/plamid_gene01 | C    | -     | -    | acyl-CoA thioesterase, lipoprotein/phage lambda repressor protein C1                                                |
| SNP | 804461 | A→C   | L1424(TTA→TTG)            | teaA       | plamid_gene02       | -    | -     | -    | TeaA protein                                                                                                        |
| SNP | 809604 | T→G   | I333(AAC→GAC)             | bioF       | b0776               | T    | T     | T    | 8-aminopurine nucleoside synthase                                                                                   |
| SNP | 820597 | C→T   | L167(LTC→CTC)             | ybfD       | b0789               | T    | T     | T    | cardiolipin synthase 2                                                                                              |
| SNP | 839156 | C→T   | G264D(GGC→GAC)            | glp        | b0805               | T    | T     | T    | ATP-dependent DNA helicase                                                                                          |
| SNP | 845401 | A→G   | G486G(TGG→GGC)            | glpP       | b0810               | G    | G     | G    | catechololate siderophore receptor FII                                                                              |
| SNP | 845656 | T→G   | intergenic (126/157)      | glpP/dsp   | b0811/b0812         | G    | G     | G    | glutamine transporter subunit                                                                                       |
| SNP | 847475 | A→C   | intergenic (139/140)      | dps/rhaA   | b0812/b0813         | C    | C     | C    | glutamine transporter subunit/Fe-binding and storage protein                                                        |
| SNP | 847609 | A→C   | intergenic (1273/26)      | dps/rhaA   | b0812/b0813         | C    | C     | C    | Fe-binding and storage protein/threonine and homoserine efflux system                                               |
| DEL | 848657 | Δ1bp  | coding (166/188 nt)       | rhaA       | b0813               | -    | -     | -    | Δ1bp                                                                                                                |
| SNP | 848886 | T→C   | D146G(GAT→GGT)            | rhaA       | b0813               | -    | -     | -    | threonine and homoserine efflux system                                                                              |
| SNP | 854868 | A→C   | K153G(AAG→GAG)            | ybtI       | b0820               | -    | -     | -    | fused predicted transporter subunits of ABC superfamily; ATP-binding components                                     |
| SNP | 855117 | T→G   | F321(TTC→GTT)             | ybtI       | b0820               | -    | -     | -    | fused predicted transporter subunits of ABC superfamily; ATP-binding components                                     |
| SNP | 857557 | T→G   | intergenic (71/81)        | ybfJ/ybfV  | b0821/b0822         | -    | -     | -    | predicted protein/sugar phosphatase; preference for fructose-1-P, ribose-5-P and glucose-6-P                        |
| SNP | 858301 | A→C   | L511(TTT→CTG)             | ybfV       | b0822               | -    | -     | -    | sugar phosphatase; preference for fructose-1-P, ribose-5-P and glucose-6-P                                          |
| SNP | 865116 | T→G   | L108(LCT→GCT)             | iaaA       | b0828               | G    | G     | G    | isoaspartyl methyltransferase                                                                                       |
| DEL | 865532 | Δ1bp  | coding (540/968 nt)       | iaaA       | b0828               | -    | -     | -    | Δ1bp                                                                                                                |
| DEL | 866840 | Δ1bp  | coding (1004/1980 nt)     | gIA        | b0829               | -    | -     | -    | Δ1bp                                                                                                                |
| SNP | 878630 | C→T   | D288(TCC→GCT)             | yfi        | b0837               | T    | T     | T    | isoaspartyl methyltransferase                                                                                       |
| SNP | 889240 | A→C   | S344(TCG→GCG)             | deoR       | b0840               | -    | -     | -    | DNA-binding transcriptional repressor                                                                               |
| SNP | 890165 | T→G   | intergenic (677/93)       | grnA/ybcJ  | b0849/b0850         | G    | G     | G    | glutaredoxin 1, redox coenzyme for ribonucleotide reductase (HnrL1)/conserved protein, DUF1448 family               |
| INS | 896700 | +G    | coding (614/296 nt)       | potH       | b0856               | +G   | +G    | +G   | putrescine transporter subunit; membrane component of ABC superfamily                                               |
| SNP | 897170 | T→G   | H76Q(TAC→CAG)             | rlnD       | b0859               | -    | -     | -    | 23S rRNA M5/J74 methytransferase                                                                                    |
| INS | 899264 | +C    | intergenic (364/227)      | arlY/arlM  | b0860/b0861         | +C   | +C    | +C   | arginine binding protein, periplasmic/arginine transporter subunit                                                  |
| SNP | 902668 | C→T   | G140C(GCC→GAC)            | yfp        | b0866               | -    | -     | -    | lipoprotein                                                                                                         |
| SNP | 910583 | C→T   | L299I(TCC→CTA)            | ybtI       | b0869               | -    | -     | -    | conserved protein with NAD(P) binding Rossmann-fold domain                                                          |
| SNP | 916006 | A→C   | S379(AAG→GAG)             | ybfD       | b0876               | -    | -     | -    | conserved protein with nucleoside triphosphate hydrolase domain                                                     |
| SNP | 918295 | T→G   | I333(GTA→GCA)             | ybfD       | b0876               | -    | -     | -    | conserved protein with nucleoside triphosphate hydrolase domain                                                     |
| SNP | 919606 | T→G   | F370Q(TTT→TGT)            | ybfD       | b0876               | -    | -     | -    | conserved protein with nucleoside triphosphate hydrolase domain                                                     |
| SNP | 920818 | T→G   | L616R(TCC→GGG)            | ybfD       | b0879               | -    | -     | -    | conserved protein with nucleoside triphosphate hydrolase domain                                                     |
| INS | 924217 | +GG   | noncoding (80/88 nt)      | serW       | b0883               | +GG  | +GG   | +GG  | HNAI-ser                                                                                                            |
| SNP | 926113 | T→G   | E503(AAG→ACA)             | cytC       | b0886               | -    | -     | -    | fused glutathione, cysteine exporter subunits of ABC superfamily; membrane component/ATP-binding component          |
| SNP | 932383 | A→C   | I382(AAG→GAG)             | ftxK       | b0895               | -    | -     | -    | DNA translocase at septal ring sorting daughter chromosomes                                                         |
| SNP | 934653 | A→C   | Q765F(GAC→CCG)            | ftxK       | b0890               | C    | C     | C    | DNA translocase at septal ring sorting daughter chromosomes                                                         |
| SNP | 940138 | T→G   | V252G(GTG→GGG)            | dmsA       | b0894               | -    | -     | -    | dimethyl sulfoxide reductase, anaerobic, subunit A                                                                  |
| SNP | 942250 | A→C   | I382(AAG→GAG)             | dmsA       | b0895               | -    | -     | -    | dimethyl sulfoxide reductase, anaerobic, subunit B                                                                  |
| SNP | 949011 | C→T   | W165(TGG→TGA)             | pflA       | b0902               | T    | T     | T    | pyruvate formate lyase activating enzyme 1                                                                          |
| SNP | 958465 | T→C   | intergenic (122/44)       | araY/ackA  | b0908/b0909         | -    | -     | -    | 5-enolpyruvylshikimate-3-phosphate synthetase/predicted peptide with chaperone function                             |
| SNP | 963846 | A→C   | I293(TAT→GAT)             | rnl        | b0913               | -    | -     | -    | inner membrane protein, ComC family competence protein                                                              |
| SNP | 978757 | A→C   | E1338A(GAA→GCA)           | ruk8       | b0924               | C    | C     | C    | chromosome condensation MukBEF, ATPase and DNA-binding subunit                                                      |
| SNP | 982288 | T→G   | Y220(TAC→GAC)             | ybcL       | b0927               | G    | G     | G    | predicted metal-binding enzyme                                                                                      |
| SNP | 992195 | T→G   | T39V(TAC→GAC)             | ybcL       | b0933               | G    | G     | G    | alkanesulfonate transporter subunit                                                                                 |
| SNP | 992821 | C→T   | G146G(GGC→GAC)            | ssuC       | b0934               | T    | T     | T    | putative alkane sulfonate transporter subunit                                                                       |
| SNP | 996575 | A→G   | T95A(AAC→GAC)             | eHA        | b0938               | G    | G     | G    | predicted fibrin-like adhesion protein                                                                              |
| SNP | 997449 | A→C   | I178A(GTC→GTC)            | eibD       | b0939               | G    | G     | G    | predicted periplasmic zinc chaperone                                                                                |
| SNP | 998745 | A→C   | K38Q(AAA→CAA)             | eifC       | b0940               | C    | C     | C    | predicted outer membrane usher protein                                                                              |
| DEL | 999441 | Δ1bp  | coding (180/260 nt)       | eifC       | b0940               | -    | -     | -    | Δ1bp                                                                                                                |
| SNP | 999611 | T→G   | L246(TTC→G                |            |                     |      |       |      |                                                                                                                     |

|     |         |     |                           |            |             |     |     |     |     |                                                                                                                                                 |
|-----|---------|-----|---------------------------|------------|-------------|-----|-----|-----|-----|-------------------------------------------------------------------------------------------------------------------------------------------------|
| SNP | 1228892 | A-C | intergenic ( 73/300)      | hvi/umuD   | b1182/b1183 | -   | -   | -   | C   | hemolysin E/DNA polymerase V, subunit D                                                                                                         |
| SNP | 1231222 | C-T | intergenic ( 225/111)     | fadR       | b1187       | -   | -   | -   | T   | DNA-binding transcriptional regulator of fatty acid metabolism                                                                                  |
| SNP | 1238020 | T-G | Z39M(ATT-ATG)             | dadX       | b1190       | G   | G   | -   | T   | alanine racemase 2, P,KP-binding                                                                                                                |
| SNP | 1238656 | T-G | intergenic ( 282/104)     | dadX/cvra  | b1190/b1191 | G   | G   | G   | G   | alanine racemase 2, P,KP-binding/predicted cation/proton antiporter                                                                             |
| SNP | 1241889 | T-A | intergenic ( 165/124)     | emaA       | b1192       | G   | G   | -   | C   | lysine methyltransferase/glyoxylate E                                                                                                           |
| SNP | 1245317 | T-C | Y162(CAT-ATG)             | traA       | b1197       | C   | C   | -   | C   | periplasmic trehalase                                                                                                                           |
| DEL | 1245247 | del | coding (121/2888 nt)      | ycfY       | b1202       | -   | -   | -   | del | predicted adhesin                                                                                                                               |
| SNP | 1255771 | T-G | Y165(AAA-ACA)             | ycfH       | b1203       | -   | -   | -   | G   | ATPase, 1 $\alpha$ -dependent, ribosome-associated                                                                                              |
| SNP | 1257846 | A-C | Y452(GTT-GTG)             | ychM       | b1206       | -   | -   | -   | C   | predicted transporter                                                                                                                           |
| SNP | 1261873 | A-G | Y348(GTG-GGG)             | lobB       | b1209       | G   | G   | G   | G   | DM lipoprotein required for localization of lipoproteins                                                                                        |
| SNP | 1265109 | C-T | intergenic ( 113/125)     | prnMC      | b1212       | -   | -   | -   | C   | N $\epsilon$ -glutamine methyltransferase, modifies release factors RF-1 and RF-2                                                               |
| SNP | 1269694 | T-G | Y105(GTT-GTG)             | kdsA       | b1215       | -   | -   | -   | T   | 3-deoxy-D-manno-oxulosonate 8-phosphate synthase                                                                                                |
| SNP | 1271447 | A-G | intergenic ( 104/235)     | narX/narK  | b1222/b1223 | G   | G   | G   | G   | senary histidine kinase in two-component regulatory system with NarX/nitrate/nitrite transporter                                                |
| SNP | 1286621 | A-G | F116(CAT-ATG)             | narX       | b1227       | -   | -   | -   | G   | nitrate reductase 1, gamma lytic/oxoiron-NADH subunit                                                                                           |
| SNP | 1287485 | T-G | intergenic ( 127/185)     | ychI/rnsA  | b1233/b1234 | G   | G   | G   | G   | conserved protein, UPF0225 family/predicted phospholipase, patatin-like family                                                                  |
| SNP | 1288515 | A-G | G282(GGA-GGG)             | rnsA       | b1234       | G   | G   | G   | G   | predicted phospholipase, patatin-like family                                                                                                    |
| SNP | 1294614 | A-G | S649(TTC-ATC)             | adhE       | b1241       | -   | -   | -   | G   | fused acetaldehyde-CoA dehydrogenase/iron-dependent alcohol dehydrogenase/pyruvate-formate lyase deacetylase                                    |
| MOB | 1297920 | -   | intergenic ( 250/485)     | ychE/oppA  | b1242/b1243 | MOB | MOB | MOB | MOB | predicted inner membrane protein/oligopeptide transporter subunit                                                                               |
| SNP | 1300779 | T-G | Y544(CAT-ATG)             | oppD       | b1246       | G   | G   | G   | G   | oligopeptide transporter subunit                                                                                                                |
| SNP | 1307560 | T-G | intergenic ( 255/115)     | kyfY/kyfI  | b1250/b1251 | -   | -   | -   | G   | voltage-gated potassium channel/predicted enzyme                                                                                                |
| SNP | 1308206 | C-T | intergenic ( 139/109)     | ychI/tonB  | b1251/b1252 | -   | -   | -   | T   | predicted enzyme/membrane spanning protein in TonB-EcbA-EcbD transport complex                                                                  |
| SNP | 1312256 | T-G | K1291(AAA-ACA)            | trpB       | b1261       | -   | -   | -   | G   | tryptophan synthase, beta subunit                                                                                                               |
| SNP | 1324479 | A-C | intergenic ( 144/238)     | ycfX/tonB  | b1271/b1272 | C   | C   | C   | C   | predicted oxoacyl (acyl carrier protein) reductase, EmrKY-ToxC system/predicted inner membrane peptidase; multiplicity suppressor of htrA(dspF) |
| SNP | 1324880 | A-C | D454(GAC-ATC)             | sonB       | b1272       | -   | -   | -   | C   | predicted inner membrane peptidase; multiplicity suppressor of htrA(dspF)                                                                       |
| SNP | 1331356 | A-G | A232(GAC-ATC)             | cyrB       | b1275       | G   | G   | G   | G   | DNA-binding transcriptional dual regulator, O $_2$ acetyl-L-serine-binding                                                                      |
| SNP | 1332406 | A-G | E71(GAA-GAG)              | ymnA       | b4522       | G   | G   | G   | G   | hypothetical protein                                                                                                                            |
| SNP | 1333942 | T-G | intergenic ( 258/115)     | ycfX/cvraA | b4523/b1276 | G   | G   | G   | G   | hypothetical protein/acetonate hydratase 1                                                                                                      |
| SNP | 1333708 | A-G | T188(GAC-GGG)             | pyz        | b1281       | -   | -   | -   | G   | uridine-5' phosphate decarboxylase                                                                                                              |
| SNP | 1344040 | A-C | F331(TTT-ATG)             | ribB       | b1286       | -   | -   | -   | C   | ribonuclease II                                                                                                                                 |
| SNP | 1347469 | A-G | G199(GGT-ATC)             | fabI       | b1288       | G   | G   | G   | G   | enoyl-acyl-carrier-protein reductase, NADH-dependent                                                                                            |
| SNP | 1352400 | C-T | intergenic ( 175/129)     | saabB      | b1293       | -   | -   | -   | T   | inner-membrane peptidase transport ABC transporter permease                                                                                     |
| SNP | 1352489 | A-G | L701(TTA-CTA)             | sapB       | b1293       | G   | G   | G   | G   | antimicrobial peptide transport ABC transporter permease                                                                                        |
| SNP | 1353599 | T-G | T339(ATT-ATC)             | puuP       | b1296       | -   | -   | -   | G   | putrescine importer                                                                                                                             |
| SNP | 1362329 | A-G | Y186(GAT-GAG)             | puaf       | b1303       | -   | -   | -   | G   | DNA-binding transcriptional activator                                                                                                           |
| SNP | 1364845 | A-C | intergenic ( 15/70)       | pspD/pspE  | b1307/b1308 | -   | -   | -   | C   | periplasmic inner membrane phase-shock protein/hiosphatase:cyanide sulfurtransferase (rhodanese)                                                |
| SNP | 1370497 | T-C | L179(TTC-ATC)             | ycfJ       | b1311       | -   | -   | -   | C   | predicted sugar transporter subunit: membrane component of ABC superfamily                                                                      |
| SNP | 1371075 | A-G | intergenic ( 125/112)     | ycfS       | b1315       | -   | -   | -   | G   | predicted oxidoreductase, NADH-binding                                                                                                          |
| SNP | 1374443 | A-G | D125(GAC-GGG)             | ycfS       | b1315       | G   | G   | G   | G   | predicted oxidoreductase, NADH-binding                                                                                                          |
| SNP | 1375927 | A-C | E273(GAA-GCA)             | ycfT       | b1316       | C   | C   | C   | C   | predicted hydrolase                                                                                                                             |
| SNP | 1377798 | A-G | D420(GAA-GAG)             | ycfU       | b1317       | G   | G   | G   | G   | beta-phosphoglucomutase                                                                                                                         |
| SNP | 1377995 | A-G | T208(AAC-GCC)             | ycfU       | b1317       | G   | G   | G   | G   | beta-phosphoglucomutase                                                                                                                         |
| SNP | 1378982 | T-G | psuedogene (916/1082 nt)  | ycfV       | b4524       | G   | G   | G   | G   | psuedogene; putative ATP-binding component of a transport system                                                                                |
| SNP | 1395654 | A-C | psuedogene (958/1217 nt)  | psuB       | b1333       | C   | C   | C   | C   | stress-induced protein                                                                                                                          |
| DEL | 1397205 | del | coding (258/516 nt)       | egt        | b1335       | del | del | del | del | O-6-alkylguanine-DNA-cytosine protein methyltransferase                                                                                         |
| DEL | 1397947 | del | coding (1053/1527 nt)     | agf        | b1336       | del | del | del | del | p-aminobenzoate glutamate transporter; membrane protein                                                                                         |
| SNP | 1398320 | C-T | intergenic ( 176/121)     | abpB       | b1337       | -   | -   | -   | T   | p-aminobenzoate glutamate hydratase, B subunit                                                                                                  |
| SNP | 1402449 | T-G | F161(TTT-ATG)             | abpR       | b1339       | -   | -   | -   | G   | predicted DNA-binding transcriptional regulator of abgA8 operon                                                                                 |
| SNP | 1412493 | A-G | intergenic ( 265/151)     | ycfW/ocacB | b1355/b1356 | -   | -   | -   | G   | Rac phage; pseudogene; tail protein homology/Phage or Phage Related                                                                             |
| SNP | 1420156 | A-G | psuedogene (230/612 nt)   | ydaW       | b1361       | G   | G   | G   | G   | Rac phage; pseudogene, DNA-binding protein homology/Phage or Phage Related                                                                      |
| SNP | 1420474 | T-G | psuedogene (548/612 nt)   | ydaW       | b1361       | -   | -   | -   | G   | Rac phage; pseudogene, DNA-binding protein homology/Phage or Phage Related                                                                      |
| SNP | 1424284 | A-G | psuedogene (755/2029 nt)  | sttA       | b1368       | -   | -   | -   | G   | Rac phage; pseudogene; tail protein homology/Phage or Phage Related; putative alpha helix protein                                               |
| SNP | 1424664 | A-G | S1305(TCA-ATC)            | ydaR       | b1372       | G   | G   | G   | G   | Rac phage; predicted tail fiber protein                                                                                                         |
| SNP | 1431355 | T-C | G326(GAA-GGG)             | ydaE       | b1375       | -   | -   | -   | C   | cold shock protein, function unknown, Rac phage                                                                                                 |
| SNP | 1431605 | A-G | D534(GAC-GGC)             | ydaE       | b1378       | -   | -   | -   | C   | fused predicted pyruvate:flavoindoxyl oxidoreductase; conserved protein/conserved protein/P45 binding protein                                   |
| SNP | 1435081 | A-G | Y977(GTA-GCA)             | ybaK       | b1378       | G   | G   | G   | G   | fused predicted pyruvate:flavoindoxyl oxidoreductase; conserved protein/conserved protein/P45 binding protein                                   |
| SNP | 1442776 | A-C | N834(AAT-ATC)             | ydbH       | b1381       | -   | -   | -   | C   | predicted protein                                                                                                                               |
| SNP | 1448971 | T-G | G633(GAA-GAG)             | paaf       | b1387       | -   | -   | -   | G   | fused coenzyme CoA hydrolase 3-oxo-5,6-dihydroxyheptyl-CoA semialdehyde dehydrogenase                                                           |
| SNP | 1451520 | A-G | A344(GCA-GGG)             | paaf       | b1388       | G   | G   | G   | G   | ring 1,2-phenylacetyl-CoA epoxidase subunit                                                                                                     |
| SNP | 1456187 | A-C | D238(GAC-GCC)             | paaf       | b1394       | -   | -   | -   | C   | 1,2-epoxyphenylacetyl-CoA isomerase, coenzyme CoA-forming                                                                                       |
| SNP | 1456626 | A-G | D564(GCA-GGG)             | paaf       | b1398       | -   | -   | -   | G   | phenylacetyl-CoA ligase                                                                                                                         |
| SNP | 1460162 | T-C | V271(GTT-GCT)             | paaf       | b1398       | C   | C   | C   | C   | phenylacetyl-CoA ligase                                                                                                                         |
| SNP | 1462172 | A-G | Y159(CAT-ATC)             | paaf       | b1400       | G   | G   | G   | G   | predicted heparidase repeat acetyltransferase                                                                                                   |
| SNP | 1464382 | T-G | intergenic ( 172/8622 nt) | ybaA       | b4492       | -   | -   | -   | G   | psuedogene, autoantiserum homolog; interrupted by IS2 and IS30                                                                                  |
| SNP | 1464932 | A-G | psuedogene (3775/8622 nt) | ybaA       | b4492       | G   | G   | G   | G   | psuedogene, autoantiserum homolog; interrupted by IS2 and IS30                                                                                  |
| SNP | 1467912 | T-G | psuedogene (5295/8622 nt) | ybaA       | b4492       | -   | -   | -   | C   | psuedogene, autoantiserum homolog; interrupted by IS2 and IS30                                                                                  |
| DEL | 1471356 | del | coding (90/861 nt)        | ydcC       | b1406       | del | del | del | del | psuedogene, autoantiserum homolog; interrupted by IS2 and IS30                                                                                  |
| INS | 1472082 | +   | coding (636/861 nt)       | ydcC       | b1406       | +   | +   | +   | +   | predicted oxidoreductase, NAD(P) binding                                                                                                        |
| SNP | 1474106 | A-G | E246(GAG-GGG)             | ydbD       | b1407       | G   | G   | G   | G   | predicted PF12071 family periplasmic methylglyoxyl resistance protein                                                                           |
| SNP | 1474985 | A-G | Y995(TAC-ATC)             | ydbD       | b1407       | -   | -   | -   | G   | predicted PF12071 family periplasmic methylglyoxyl resistance protein                                                                           |
| SNP | 1475255 | A-C | N137(AAC-ATC)             | ybaA       | b1408       | C   | C   | C   | C   | inner membrane protein                                                                                                                          |
| SNP | 1477986 | A-G | K541(AAA-9AAG)            | ybaC       | b1410       | G   | G   | G   | G   | predicted hydrolase                                                                                                                             |
| SNP | 1478764 | T-G | E384(MAT-ATC)             | ybaD       | b1410       | G   | G   | G   | G   | predicted phosphatase inner membrane protein                                                                                                    |
| SNP | 1482635 | A-G | S7885(TCA-ATC)            | hraA       | b1413       | G   | G   | G   | G   | predicted ATP-dependent helicase                                                                                                                |
| SNP | 1484704 | A-G | N815(AAT-ATC)             | ydcF       | b1414       | -   | -   | -   | C   | conserved S4M-binding protein, DUf218 superfamily                                                                                               |
| SNP | 1484935 | A-G | T359(AAC-GGG)             | ydcF       | b1414       | G   | G   | G   | G   | conserved S4M-binding protein, DUf218 superfamily                                                                                               |
| SNP | 1487284 | A-C | psuedogene (656/1001 nt)  | gafC       | b4493       | C   | C   | C   | C   | psuedogene, GAP dehydrogenase; glyceraldehyde 3-phosphate dehydrogenase (second fragment)                                                       |
| SNP | 1490554 | C-T | intergenic ( 122/518)     | gafC       | b1421       | -   | -   | -   | T   | methylophilin-like protein; galactose sensor receptor                                                                                           |
| SNP | 1503442 | A-G | L151(CAT-ATG)             | ydcN       | b1434       | G   | G   | G   | G   | predicted DNA-binding transcriptional regulator                                                                                                 |
| SNP | 1504765 | T-G | N153(AAT-ATG)             | ydcN       | b1435       | G   | G   | G   | G   | predicted peritase                                                                                                                              |
| SNP | 1507111 | A-C | A154(AAC-GCC)             | hcrB       | b1438       | C   | C   | C   | C   | antitoxin for the HcrA toxin-antitoxin system; mutational suppressor of null pscE lethality                                                     |
| SNP | 1507804 | T-G | D192(GAT-GAG)             | ydbR       | b1439       | G   | G   | G   | G   | predicted iron outer membrane transporter                                                                                                       |
| SNP | 1513831 | A-G | H438(GAC-GGC)             | pry        | b1444       | G   | G   | G   | G   | gamma-aminobutyraldehyde dehydrogenase                                                                                                          |
| SNP | 1517724 | A-G | T96(AAA-9AAG)             | mydA       | b1450       | G   | G   | G   | G   | colicin acid and toxin gene transcriptional regulator, MspR-controlled                                                                          |
| SNP | 1518425 | T-G | M623(ATG-CGT)             | yndC       | b1451       | -   | -   | -   | G   | predicted iron outer membrane transporter                                                                                                       |
| SNP | 1519937 | G-A | Q119(TCA-ATA)             | yndC       | b1451       | -   | -   | -   | A   | predicted iron outer membrane transporter                                                                                                       |
| SNP | 1521024 | C-T | H176(AAC-ATC)             | yneF       | b1452       | -   | -   | -   | T   | ATP-binding protein, periplasmic, function unknown                                                                                              |
| SNP | 1530682 | A-G | W687(TGC-CCG)             | ydbH       | b1462       | -   | -   | -   | C   | conserved protein                                                                                                                               |
| SNP | 1531365 | A-G | T306(GAC-CCC)             | nhoA       | b1463       | C   | C   | C   | C   | N-hydroxyvaline O-acetyltransferase                                                                                                             |
| SNP | 1533829 | A-G | S966(TTT-ATC)             | narZ       | b1468       | -   | -   | -   | C   | nitrate reductase 2 (NrdZ), alpha subunit                                                                                                       |
| SNP | 1540400 | T-C | N119(AAC-ATC)             | ydgE       | b1473       | -   | -   | -   | C   | aromatic amino acid exporter                                                                                                                    |
| SNP | 1540850 | A-G | S740(GAG-GGG)             | hmg        | b1474       | G   | G   | G   | G   | formate dehydrogenase-N, alpha subunit, nitrate-inducible                                                                                       |
| SNP | 1541022 | A-G | F618(GAT-GAG)             | fdhH       | b1475       | -   | -   | -   | G   | formate dehydrogenase-N, Fe-S (beta) subunit, nitrate-inducible                                                                                 |
| SNP | 1542112 | A-G | I217(AAT-ATC)             | fdhI       | b1476       | -   | -   | -   | G   | formate dehydrogenase-N, cytochrome B556 (gamma) subunit, nitrate-inducible                                                                     |
| SNP | 1552123 | A-C | intergenic ( 24/78)       | sra/bdm    | b1480/b1481 | -   | -   | -   | C   | Stationary phase-induced ribosome-associate protein/biofilm-dependent modulation protein                                                        |
| SNP | 1555419 | A-G | F971(TTC-ATG)             | ycfE       | b1487       | -   | -   | -   | C   | D-3 $\alpha$ -D-3 transporter subunit                                                                                                           |
| SNP | 1560916 | T-G | K682(GAT-CAG)             | douP       | b1489       | -   | -   | -   | G   | oxygen sensor, c-di-GMP phosphodiesterase, heme-regulated; cold- and stationary phase-induced bifilm regulator                                  |
| SNP | 1574236 | A-G | F174(GTC-ATC)             | ydbH       | b1499       | -   | -   | -   | G   | predicted porin protein                                                                                                                         |
| SNP | 1581849 | T-G | intergenic ( 139/13)      | ydcN/ydcO  | b1490/b1499 | G   | G   | G   | G   | conserved protein/transcriptional activator for mdxE                                                                                            |
| SNP | 1585974 | T-G | intergenic ( 61/14)       | ydcO/yafA  | b1499/b1500 | G   | G   | G   | G   | transcriptional activator for mdxE/Two component system connector membrane protein, EvgSA to PhoDP                                              |
| SNP | 1585945 | A-G | E470(GAA-9AAG)            | safA       | b1500       | -   | -   | -   | G   | Two component system connector membrane protein, EvgSA to PhoDP                                                                                 |
| SNP | 1581952 | C-T | Y587(CTG-ATC)             | ydcP       | b1501       | T   | T   | T   | T   | predicted oxidoreductase                                                                                                                        |
| SNP | 1582480 | A-G | V088(GTA-GCA)             | ydcP       | b1501       | G   | G   | G   | G   | predicted oxidoreductase                                                                                                                        |
| SNP | 1583800 | A-G | intergenic ( 183/234)     | ydcQ/ydcQc | b1501/b1502 | G   | G   | G   | G   | predicted oxidoreductase, Zn-dependent and NAD(P)-binding                                                                                       |
| SNP | 1584759 | T-G | N688(AAT-ATC)             | ydcQ       | b1502       | -   | -   | -   | G   | predicted fibrillar-like adhesin protein                                                                                                        |
| INS | 1588606 | +   | psuedogene (422/1149 nt)  | ydcT       | b1505       | -   | -   | -   | +   | psuedogene; putative outer membrane protein                                                                                                     |
| SNP | 1587507 | T-G | psuedogene (1216/283 nt)  | yneE       | b1506       | -   | -   | -   | G   | psuedogene, iron formate                                                                                                                        |
| SNP | 1588882 | A-G | I184(TTT-ATC)             | hpaB       | b1507       | G   | G   | G   | G   | serine protein kinase required for perister formation; toxin of HpaAB toxin-antitoxin system                                                    |
| INS | 1591350 | +   | psuedogene (386/1422 nt)  | yneO       | b4996       | +   | +   | +   | +   | psuedogene, A16a homolog                                                                                                                        |
| INS | 1591474 | +   | psuedogene (3839/1422 nt) | yneO       | b4996       | +   | +   | +   | +   | psuedogene, A16a homolog                                                                                                                        |
| INS | 1594532 | +   | psuedogene (781/5422 nt)  | yneO       | b4996       | +   | +   | +   | +   | psuedogene, A16a homolog                                                                                                                        |
| DEL | 1595561 | del | intergenic ( 249/280)     | yneO/hcrK  | b4996/b1511 | del | del | del | del | psuedogene, A16a homolog/autolysin 2 (A1-2) kinase                                                                                              |
| SNP | 1600620 | T-G | luc                       | luc        | b1514       | G   | G   | G   | G   | Autolysin 2 import system permease protein                                                                                                      |
| SNP | 1600698 | G-A | A218(GGG-GCA)             | luc        | b1514       | A   | A   | A   | A   | Autolysin 2 import system permease protein                                                                                                      |
| SNP | 1612034 | A-T | D210(GAT-ATC)             | yneI       | b1526       | -   | -   | -   | T   | predicted DNA-binding transcriptional regulator                                                                                                 |
| SNP | 1613536 | T-G | H176(GAT-ATC)             | yneE       | b1527       | -   | -   | -   | G   | predicted protein                                                                                                                               |
| SNP | 1614602 | A-C | I1171(ATT-CTT)            | ydaE       | b1528       | -   | -   | -   | G   | predicted arabinose transporter                                                                                                                 |
| SNP | 1615469 | T-G | *221(TAA-ATC)             | marC       | b1529       | -   | -   | -   | G   | inner membrane protein, UPF056 family                                                                                                           |
| SNP | 1615987 | T-G | L377(CAT-ATC)             | ydcE       | b1534       | -   | -   | -   | G   | predicted transporter                                                                                                                           |
| SNP | 1619149 | T-G | S188A(TGC-GCC)            | ydcE       | b1534       | -   | -   | -   | G   | predicted transporter                                                                                                                           |
| SNP | 1619347 | T-C | V807(GAT-GCA)             | ydcE       | b1534       | -   | -   | -   | C   | predicted transporter                                                                                                                           |
| SNP | 1621129 | T-C | H484(GAT-ATC)             | dcp        | b1538       | -   | -   | -   | G   | predicted carboxypeptidase II                                                                                                                   |
| SNP | 1624215 | T-G | E131(GAA-GCA)             | dcp        | b1538       | G   | G   | G   | G   | predicted carboxypeptidase II                                                                                                                   |
| SNP | 1624481 | T-G | E420(GAA-9AAG)            | dcp        | b1538       | -   | -   | -   | G   | predicted carboxypeptidase II                                                                                                                   |
| SNP | 1628531 | A-C | psuedogene (2154/2183 nt) | ydcI       | b4600       | -   | -   | -   | G   | psuedogene, MFS transporter family; interrupted by Qin phage; Phage or Phage Related; putative transport protein                                |
| SNP | 1631929 | T-G | psuedogene (16136/21      |            |             |     |     |     |     |                                                                                                                                                 |

|     |         |      |                                                                            |            |             |   |    |    |                                                                                                                                                                                                |                                                                 |
|-----|---------|------|----------------------------------------------------------------------------|------------|-------------|---|----|----|------------------------------------------------------------------------------------------------------------------------------------------------------------------------------------------------|-----------------------------------------------------------------|
| SNP | 181135  | A->G | L170L(TA->CTG)                                                             | ylfX       | b1750       | - | G  | G  | inner membrane protein, TPV38/TEM64 family                                                                                                                                                     |                                                                 |
| SNP | 181216  | A->G | L537G(GC->GCA)                                                             | top8       | b1763       | - | G  | A  | DNA topoisomerase II                                                                                                                                                                           |                                                                 |
| SNP | 1844040 | G->A | A49V(GCG->GTG)                                                             | top8       | b1763       | - | A  | A  | DNA topoisomerase II                                                                                                                                                                           |                                                                 |
| SNP | 1846150 | T->G | F38C(TTC->ATC)                                                             | sppA       | b1766       | - | -  | G  | protease IV (signal peptide peptidase)                                                                                                                                                         |                                                                 |
| SNP | 1846297 | A->C | K397T(GTC->ATC)                                                            | sppA       | b1766       | - | -  | C  | protease IV (signal peptide peptidase)                                                                                                                                                         |                                                                 |
| SNP | 1848645 | T->G | CL178A(TGT->TGG)                                                           | pnxA       | b1768       | - | -  | G  | nicotinamide/syrazinamide                                                                                                                                                                      |                                                                 |
| SNP | 1852050 | A->C | intergenic (7-1146)                                                        | ydf/ydfG   | b1770/b1771 | - | G  | C  | predicted DNA-binding transcriptional regulator/alpha-keto reductase, NADH-dependent; can use methylglyoxal as substrate                                                                       |                                                                 |
| DEL | 1851140 | del  | intergenic (117-117)                                                       | ydfG       | b1771       | - | -  | A  | alpha-keto reductase, NADH-dependent; can use methylglyoxal as substrate                                                                                                                       |                                                                 |
| SNP | 1858237 | T->G | T107T(ACA->ACC)                                                            | ydlJ       | b1776       | - | -  | G  | predicted oxidoreductase, 2n-dependent and NAD(P) binding                                                                                                                                      |                                                                 |
| SNP | 1858732 | A->C | intergenic (1378-195)                                                      | ydf/ydfC   | b1776/b1777 | - | -  | C  | predicted oxidoreductase, 2n-dependent and NAD(P) binding/conserved protein                                                                                                                    |                                                                 |
| SNP | 1861178 | A->C | G86A(AAG->AAC)                                                             | yead       | b1780       | - | -  | C  | conserved protein                                                                                                                                                                              |                                                                 |
| SNP | 1866788 | T->C | P203R(CCT->CCC)                                                            | yeah       | b1784       | - | -  | C  | conserved protein                                                                                                                                                                              |                                                                 |
| SNP | 1869262 | A->G | A249A(GCA->GCG)                                                            | yeah       | b1784       | - | -  | G  | conserved protein                                                                                                                                                                              |                                                                 |
| SNP | 1869829 | T->C | S122T(TCC->GCC)                                                            | yeal       | b1786       | - | -  | C  | predicted diguanylate cyclase                                                                                                                                                                  |                                                                 |
| SNP | 1870384 | T->C | G378G(GGT->GGC)                                                            | yeal       | b1786       | - | -  | C  | predicted diguanylate cyclase                                                                                                                                                                  |                                                                 |
| SNP | 187397  | T->C | G282G(GCA->GGG)                                                            | yea2       | b1795       | - | -  | C  | conserved protein, UPF010 family                                                                                                                                                               |                                                                 |
| DEL | 187580  | del  | intergenic (1001-848)                                                      | yea2/yea2b | b1795/b1796 | - | -  | A  | conserved protein, UPF010 family/predicted protein                                                                                                                                             |                                                                 |
| SNP | 1878940 | G->A | S31L(CA->TTA)                                                              | dmrIR      | b1799       | - | A  | A  | DNA-binding transcriptional activator for dnmA                                                                                                                                                 |                                                                 |
| SNP | 1882494 | A->C | G142P(CAG->CCG)                                                            | yeaK       | b1809       | - | -  | C  | predicted oxidoreductase                                                                                                                                                                       |                                                                 |
| SNP | 1882491 | A->C | H292Q(CAT->CAG)                                                            | faed       | b1805       | - | -  | C  | acyl-CoA synthetase (long-chain-fatty acid-CoA ligase)                                                                                                                                         |                                                                 |
| SNP | 1889517 | A->C | T889Y(TG->CGG)                                                             | yoaA       | b1808       | - | -  | C  | conserved protein with nucleoside triphosphatase domain                                                                                                                                        |                                                                 |
| SNP | 1889428 | T->G | D138A(GAT->GAG)                                                            | padB       | b1812       | - | -  | G  | aminooxychlorimide synthase, subunit I                                                                                                                                                         |                                                                 |
| SNP | 1895005 | T->G | T277T(ACT->AGC)                                                            | sdaA       | b1814       | - | -  | C  | conserved protein                                                                                                                                                                              |                                                                 |
| SNP | 1895029 | T->C | G285G(GGT->GGC)                                                            | sdaA       | b1814       | - | -  | C  | L-serine deaminase I                                                                                                                                                                           |                                                                 |
| SNP | 1902937 | T->G | L429G(TAT->GCT)                                                            | asbB       | b1815       | - | -  | G  | predicted phosphohydroxylase                                                                                                                                                                   |                                                                 |
| SNP | 1900124 | T->G | D262E(GAT->GAG)                                                            | manX       | b1817       | - | -  | G  | fused mannose-specific PTS enzymes: IIA component/IIb component                                                                                                                                |                                                                 |
| SNP | 1903684 | T->G | H021P(CAT->CCT)                                                            | rhmA       | b1822       | - | G  | G  | 23S rRNA m1G745 methyltransferase                                                                                                                                                              |                                                                 |
| SNP | 1915096 | T->G | Y649G(TAC->TGC)                                                            | prc        | b1830       | - | -  | C  | carboxy-terminal protease for penicillin-binding protein 3                                                                                                                                     |                                                                 |
| SNP | 1911879 | A->C | S55A(TTC->GCT)                                                             | prc        | b1830       | - | -  | C  | carboxy-terminal protease for penicillin-binding protein 3                                                                                                                                     |                                                                 |
| SNP | 1912744 | T->G | K60A(GAG->CAG)                                                             | proQ       | b1831       | - | -  | G  | RNA chaperone, probable regulator of ProP transcription                                                                                                                                        |                                                                 |
| SNP | 1915668 | A->G | G195G(GCT->GAT)                                                            | yeaG       | b1833       | - | -  | G  | inner membrane protein                                                                                                                                                                         |                                                                 |
| SNP | 1921917 | G->A | A89V(GCC->GTC)                                                             | yobA       | b1841       | - | A  | A  | conserved protein                                                                                                                                                                              |                                                                 |
| SNP | 1921192 | T->G | N178A(AAT->AAG)                                                            | yobB       | b1843       | - | -  | G  | conserved protein                                                                                                                                                                              |                                                                 |
| SNP | 1924460 | A->C | coding (136/1085 nt)                                                       | iroB       | b1845       | - | -  | C  | protease II                                                                                                                                                                                    |                                                                 |
| SNP | 1927255 | T->C | T314A(TGT->GCT)                                                            | yedB       | b1847       | - | -  | C  | secreted protein                                                                                                                                                                               |                                                                 |
| SNP | 1930411 | A->C | V473G(TGT->GTC)                                                            | yefE       | b1851       | - | -  | C  | 6-phosphogluconate dehydratase                                                                                                                                                                 |                                                                 |
| INS | 1931703 | A->G | coding (2161/227)                                                          | zwf/yeaX   | b1852/b1853 | - | +A | +A | glucose-6-phosphate dehydrogenase/predicted DNA-binding transcriptional regulator                                                                                                              |                                                                 |
| SNP | 1946028 | A->C | F570T(TTT->TGT)                                                            | aspS       | b1866       | - | -  | C  | aspartyl-tRNA synthetase                                                                                                                                                                       |                                                                 |
| SNP | 1967415 | T->C | D205G(GAT->GGT)                                                            | tap        | b1885       | - | -  | C  | methyl-accepting protein IV                                                                                                                                                                    |                                                                 |
| SNP | 1970746 | A->G | N68A(TAA->AAG)                                                             | chvE       | b1887       | - | -  | G  | putine-binding, serine-threonine protein                                                                                                                                                       |                                                                 |
| SNP | 1974425 | T->G | intergenic (1150/65)                                                       | motA/Ihbc  | b1890/b1891 | - | -  | G  | proton conductor component of flagellar motor/DNA-binding transcriptional dual regulator with FliD                                                                                             |                                                                 |
| SNP | 1974973 | T->G | E320A(GAA->GAC)                                                            | Rhc        | b1891       | - | -  | G  | DNA-binding transcriptional dual regulator with FliD                                                                                                                                           |                                                                 |
| SNP | 1978940 | A->C | S243T(TAC->ACC)                                                            | otcB       | b1897       | - | -  | G  | trehalose-6-phosphate phosphatase, biosynthetic                                                                                                                                                |                                                                 |
| SNP | 1981009 | A->C | F115L(TTT->TGT)                                                            | araF       | b1901       | - | -  | C  | L-arabinose transporter subunit                                                                                                                                                                |                                                                 |
| SNP | 1988377 | A->C | V156G(GTA->GGA)                                                            | yeaA       | b1908       | - | -  | C  | conserved protein, UPF010 family                                                                                                                                                               |                                                                 |
| SNP | 1988988 | A->C | G23W(TTT->GTT)                                                             | pgaA       | b1912       | - | -  | C  | phosphoglycylphosphatase synthetase                                                                                                                                                            |                                                                 |
| SNP | 1993737 | G->A | A233(GCC->GTC)                                                             | doyD       | b1919       | - | -  | A  | D-cysteine desulfurase, PLP-dependent                                                                                                                                                          |                                                                 |
| INS | 1995872 | A->G | coding (133/1087 nt)                                                       | iroB       | b1919       | - | -  | G  | D-cysteine desulfurase, PLP-dependent                                                                                                                                                          |                                                                 |
| SNP | 2000983 | T->G | intergenic (1151/113)                                                      | fliC/RD    | b1923/b1924 | - | -  | G  | flagellar filament structural protein (flagellin)/flagellar filament capping protein                                                                                                           |                                                                 |
| SNP | 2003443 | T->C | G186G(TGT->GGC)                                                            | amyA       | b1927       | - | -  | C  | cytoplasmic alpha-amylase                                                                                                                                                                      |                                                                 |
| SNP | 2003442 | A->C | E33A(GAT->GCA)                                                             | yeaE       | b1929       | - | -  | C  | predicted inner membrane protein                                                                                                                                                               |                                                                 |
| SNP | 2011359 | T->G | S303A(TCC->GCC)                                                            | fliF       | b1938       | - | -  | C  | flagellar basal-body MS-ring and collar protein                                                                                                                                                |                                                                 |
| SNP | 2021267 | A->C | K263A(AAA->CAA)                                                            | rcaA       | b1951       | - | -  | C  | DNA-binding transcriptional activator, co-regulator with RcaB                                                                                                                                  |                                                                 |
| SNP | 2025425 | A->C | predicted DNA-binding response regulator in two-component system with YeeV | yeaM       | b1969       | - | -  | C  | predicted DNA-binding response regulator in two-component system with YeeV                                                                                                                     |                                                                 |
| SNP | 2040809 | A->C | intergenic (28/166)                                                        | serJ/nstA  | b1975/b1976 | - | -  | C  | HNA-Ser/anti-repressor for Dga(Mlc)                                                                                                                                                            |                                                                 |
| SNP | 2040805 | A->C | K7N(AAA->AAG)                                                              | mfaA       | b1976       | - | -  | C  | anti-repressor for Dga(Mlc)                                                                                                                                                                    |                                                                 |
| SNP | 2045139 | G->A | G99A(GAA->GAA)                                                             | yeaI       | b1978       | - | -  | A  | probable aspartyl-tRNA synthetase                                                                                                                                                              |                                                                 |
| SNP | 2050932 | A->C | R229I(GCA->GCC)                                                            | shaA       | b1981       | - | -  | C  | shikimate transporter                                                                                                                                                                          |                                                                 |
| INS | 205648  | A    | coding (277/1488 nt)                                                       | yeoD       | b1985       | - | -  | +A | predicted multidrug exporter, MATE family                                                                                                                                                      |                                                                 |
| SNP | 2056768 | A->G | G130G(GAT->GAT)                                                            | nae        | b1988       | - | -  | G  | DNA-binding transcriptional dual regulator of nitrogen assimilation                                                                                                                            |                                                                 |
| SNP | 2059202 | T->C | intergenic (45/282)                                                        | naa/sunV   | b1988/b1989 | - | -  | G  | DNA-binding transcriptional dual regulator of nitrogen assimilation/rRNA-Aus                                                                                                                   |                                                                 |
| SNP | 2061222 | T->G | intergenic (234/67)                                                        | cobU/yeeh  | b1993/b4639 | - | -  | G  | bifunctional cobamide kinase; cobamide nucleotide guanylyltransferase/pseudogene                                                                                                               |                                                                 |
| SNP | 2061647 | A->C | coding (133/1087 nt)                                                       | iroB       | b1995       | - | -  | G  | INS transposase and trans-activator                                                                                                                                                            |                                                                 |
| SNP | 2065634 | T->C | pseudogene (10/15 nt)                                                      | yeaH       | b4641       | - | -  | C  | conserved protein                                                                                                                                                                              |                                                                 |
| SNP | 2067572 | A->C | intergenic (89/127)                                                        | yeaY/yeaA  | b4641/b4582 | - | -  | C  | pseudogene, CP4-44 putative phage remnant/Phase or Prophage Related; interrupted by G2 and C-terminal deletion                                                                                 |                                                                 |
| SNP | 2069096 | T->G | intergenic (187/3870 nt)                                                   | yepF       | b1999/b2000 | - | -  | G  | CP4-44 prophage; predicted disrupted hemin or colicin receptor/Phase or Prophage Related; interrupted by G2 and C-terminal deletion                                                            |                                                                 |
| SNP | 2068605 | A->G | intergenic (1709/158)                                                      | yepY/ru    | b1999/b2000 | - | -  | G  | pseudogene, CP4-44 prophage; predicted GTP-binding protein/Phase or Prophage Related; putative histone/CP4-44 prophage; antigen 43 [Ag43] phase-variable biofilm formation autoantiseroprotein |                                                                 |
| SNP | 2068623 | A->C | intergenic (180/140)                                                       | yeaY/ru    | b1999/b2000 | - | -  | C  | pseudogene, CP4-44 prophage; predicted GTP-binding protein/Phase or Prophage Related; putative histone/CP4-44 prophage; antigen 43 [Ag43] phase-variable biofilm formation autoantiseroprotein |                                                                 |
| SNP | 2070255 | G->A | intergenic (17/10)                                                         | ru         | b2000       | - | -  | C  | CP4-44 prophage; antigen 43 [Ag43] phase-variable biofilm formation autoantiseroprotein                                                                                                        |                                                                 |
| SNP | 2071386 | T->C | L875Y(TGC->CCG)                                                            | ru         | b2000       | - | -  | C  | CP4-44 prophage; antigen 43 [Ag43] phase-variable biofilm formation autoantiseroprotein                                                                                                        |                                                                 |
| SNP | 2074834 | T->G | S45Y(TCT->TCG)                                                             | cbaA       | b2005       | - | -  | G  | CP4-44 prophage; toxin of the YeeV-YeeU toxin-antitoxin system                                                                                                                                 |                                                                 |
| SNP | 2078125 | C->T | E212A(TAT->AAT)                                                            | slmC       | b2009       | - | -  | G  | DNA gyrase inhibitor                                                                                                                                                                           |                                                                 |
| SNP | 2078915 | A->G | intergenic (129/190)                                                       | slmC/tadC  | b2009/b2010 | - | -  | G  | DNA gyrase inhibitor                                                                                                                                                                           |                                                                 |
| SNP | 2080569 | A->C | G285G(GGT->GGC)                                                            | scbA       | b2011       | - | -  | C  | exonuclease I                                                                                                                                                                                  |                                                                 |
| SNP | 2080987 | T->G | I836A(TAT->ATG)                                                            | scbB       | b2011       | - | -  | G  | exonuclease I                                                                                                                                                                                  |                                                                 |
| SNP | 2082583 | A->C | V566G(TGT->GGT)                                                            | yeeE       | b2013       | - | -  | C  | inner membrane protein, UPF0384 family                                                                                                                                                         |                                                                 |
| SNP | 2091702 | C->T | coding (133/1087 nt)                                                       | iroB       | b2122       | - | -  | C  | 6-phosphogluconate dehydratase, catalytic subunit with HsdH                                                                                                                                    |                                                                 |
| SNP | 2098120 | T->C | T125A(GCC->GCC)                                                            | gnd        | b2029       | - | -  | C  | 6-phosphogluconate dehydratase, decarboxylating                                                                                                                                                |                                                                 |
| SNP | 2100961 | A->C | F288T(TTC->TTC)                                                            | wbbK       | b2032       | - | -  | C  | lipopolysaccharide biosynthesis protein                                                                                                                                                        |                                                                 |
| SNP | 2102589 | A->C | G28A(TAT->GAT)                                                             | galT       | b2034       | - | -  | C  | GalT/alpha-galactose-1,3-galactosyltransferase                                                                                                                                                 |                                                                 |
| SNP | 2106136 | A->C | S25A(TTC->GCT)                                                             | rfaX       | b2037       | - | -  | C  | predicted polyprenol-linked O-antigen transporter                                                                                                                                              |                                                                 |
| SNP | 2108715 | G->A | F164T(TTC->TTT)                                                            | rhd        | b2040       | - | -  | A  | dTDP-4-dehydroxyflavonone reductase subunit, NAD(P) binding; of dTDP-L-rhamnose synthase                                                                                                       |                                                                 |
| SNP | 2110055 | T->G | intergenic (162/419)                                                       | rfaK/rfaF  | b2041/b2042 | - | -  | G  | INS-glucose-6-phosphate dehydrogenase, NAD(P) binding/putative regulatory subunit for GalT                                                                                                     |                                                                 |
| SNP | 2112335 | T->C | I262M(ATA->ATG)                                                            | wcaM       | b2043       | - | -  | C  | colanic acid biosynthesis protein                                                                                                                                                              |                                                                 |
| SNP | 2117860 | G->A | P979G(CCG->TCG)                                                            | wcaI       | b2047       | - | -  | A  | A                                                                                                                                                                                              | predicted UDP-glucose lipid carrier transferase                 |
| SNP | 2121496 | T->G | S176A(GCC->GCC)                                                            | rmlB       | b2049       | - | -  | G  | mannose-1-phosphate guanylyltransferase                                                                                                                                                        |                                                                 |
| SNP | 2121270 | T->C | E59E(GAA->GAG)                                                             | gmm        | b2051       | - | -  | C  | GDP-mannose mannosyl hydrolase                                                                                                                                                                 |                                                                 |
| SNP | 2121514 | T->G | E142A(GAA->GCA)                                                            | gmd        | b2053       | - | -  | C  | GDP-D-mannose dehydratase, NAD(P) binding                                                                                                                                                      |                                                                 |
| SNP | 2121746 | A->G | L203W(GAT->GAT)                                                            | wcaD       | b2056       | - | -  | C  | predicted colanic acid polymerase                                                                                                                                                              |                                                                 |
| SNP | 2131306 | A->C | L617T(A-TGA)                                                               | wab        | b2061       | - | -  | C  | protein-tyrosine phosphatase                                                                                                                                                                   |                                                                 |
| SNP | 2141463 | T->G | E102A(GTA->GCA)                                                            | waa        | b2062       | - | -  | G  | protein required for capsular polysaccharide translocation through the outer membrane                                                                                                          |                                                                 |
| SNP | 2141516 | A->G | Y67C(TAC->ACC)                                                             | yeeE       | b2067       | - | -  | C  | predicted diguanylate cyclase, GGCC domain-signaling protein                                                                                                                                   |                                                                 |
| SNP | 2141970 | T->C | G80G(GCA->GGG)                                                             | yefB       | b2070       | - | -  | C  | conserved protein                                                                                                                                                                              |                                                                 |
| SNP | 2154510 | A->G | Y67C(TAC->ACC)                                                             | mehB       | b2075       | - | -  | G  | multidrug efflux system, subunit B                                                                                                                                                             |                                                                 |
| SNP | 2155204 | G->A | S196A(TCC->ACC)                                                            | mehC       | b2075       | - | -  | G  | multidrug efflux system, subunit B                                                                                                                                                             |                                                                 |
| SNP | 2161750 | A->C | K287Q(AAA->AAG)                                                            | yeeQ       | b2081       | - | -  | C  | predicted peptidase                                                                                                                                                                            |                                                                 |
| SNP | 2164117 | T->G | V61G(TGT->GAG)                                                             | yeeR       | b2086       | - | -  | G  | phosphatidylglycerol kinase, metal-dependent                                                                                                                                                   |                                                                 |
| SNP | 2171819 | A->C | intergenic (749/21)                                                        | galT/pepA  | b2093/b2094 | - | -  | C  | galactosyl-specific enzyme IIb component of PIS/galactol-specific enzyme IIA component of PTS                                                                                                  |                                                                 |
| SNP | 2181925 | A->C | C201T(TGT->GCT)                                                            | rhm        | b2104       | - | -  | C  | hydroxyethylthioalazine kinase                                                                                                                                                                 |                                                                 |
| SNP | 2181517 | A->C | E138A(GAG->GAG)                                                            | rfaH       | b2106       | - | -  | C  | membrane protein conferring nickel and cobalt resistance                                                                                                                                       |                                                                 |
| SNP | 2181980 | A->C | intergenic (124/195)                                                       | rcaA/rcaN  | b2106/b2107 | - | -  | C  | membrane protein conferring nickel and cobalt resistance/periplasmic modulator of Ni and Co efflux                                                                                             |                                                                 |
| SNP | 2186163 | A->G | S688T(TGC->CCG)                                                            | yeeH       | b2109       | - | -  | G  | predicted outer membrane protein                                                                                                                                                               |                                                                 |
| SNP | 2191048 | A->C | Y85D(GAT->GAT)                                                             | yeeH/yeaH  | b2109/b2118 | - | -  | C  | predicted outer membrane protein                                                                                                                                                               |                                                                 |
| SNP | 2201803 | A->C | intergenic (290/137)                                                       | yeeH/yeaH  | b4541/b2119 | - | -  | C  | predicted protein/predicted transporter subunit: ATP-binding component of ABC superfamily                                                                                                      |                                                                 |
| SNP | 2204143 | T->G | L409V(TTA->GTA)                                                            | yeeM       | b2120       | - | -  | C  | predicted protein                                                                                                                                                                              |                                                                 |
| SNP | 2208813 | A->C | pseudogene (1806/4605 nt)                                                  | yeeD       | b2122       | - | -  | C  | pseudogene                                                                                                                                                                                     |                                                                 |
| DEL | 2211558 | del  | coding (311/1686 nt)                                                       | yeeHJ      | b2126       | - | -  | A  | predicted sensory kinase in two-component system with YeeT, inner membrane protein                                                                                                             |                                                                 |
| SNP | 2211580 | A->C | L97V(TTA->GTA)                                                             | yeeHJ      | b2126       | - | -  | C  | predicted sensory kinase in two-component system with YeeT, inner membrane protein                                                                                                             |                                                                 |
| SNP | 2215612 | T->G | K153A(GAT->GAT)                                                            | yeeV       | b2130       | - | -  | C  | predicted transporter subunit/membrane protein component of ABC superfamily                                                                                                                    |                                                                 |
| SNP | 2218755 | C->T | M153A(TGC->ATC)                                                            | bgjX       | b2132       | - | -  | T  | T                                                                                                                                                                                              | beta-D-glucose glycohydrolase, periplasmic                      |
| SNP | 2221388 | A->C | L122A(TAT->ACT)                                                            | yeeD       | b2136       | - | -  | C  | inner membrane protein, DnaE family                                                                                                                                                            |                                                                 |
| SNP | 2221789 | A->C | T33A(TAT->GCT)                                                             | yeeK       | b2142       | - | -  | C  | inner membrane protein, UspF family                                                                                                                                                            |                                                                 |
| SNP | 2237615 | A->C | intergenic (43/237)                                                        | mgjB/gaIs  | b2150/b2151 | - | -  | C  | methylgalactoside transporter subunit/DNA-binding transcriptional repressor                                                                                                                    |                                                                 |
| SNP | 2250989 | A->G | R167R(GGT->GGC)                                                            | nuxP       | b2161       | - | -  | G  | nucleoside pyrophosphatase                                                                                                                                                                     |                                                                 |
| SNP | 2261795 | A->C | E146A(GCA->GCA)                                                            | rfaB       | b2162       | - | -  | G  | ribonucleoside diphosphate 2                                                                                                                                                                   |                                                                 |
| SNP | 2251694 | A->C | F288C(TTC->TGC)                                                            | psuT       | b2164       | - | -  | -  | C                                                                                                                                                                                              | predicted nucleoside transporter                                |
| SNP | 2252137 | T->G | E152A(GAA->GCA)                                                            | psuG       | b2165       | - | -  | -  | C                                                                                                                                                                                              | pseudouridine 5-phosphate glycohydrolase                        |
| SNP | 2266795 | A->C | S45U(AGT->AGC)                                                             | ipdA       | b2172       | - | -  | -  | C                                                                                                                                                                                              | Predicted D-mannose oxidoreductase, NAD-dependent               |
| SNP | 2267280 | T->C | S45U(AGT->AGC)                                                             | ipdA       | b2172       | - | -  | C  | Lipid A 1-diphosphate synthase; undecaprenyl pyrophosphate/lipid A 1-phosphate phosphotransferase                                                                                              |                                                                 |
| SNP | 2271870 | T->G | I550M(ATI->ATG)                                                            | yeeH       | b2178       | - | -  | -  | C                                                                                                                                                                                              | microsome C transporter YeeH/ABE8; permease subunit; ABC family |
| SNP | 2272328 | A->C | L340A(TAT->GAT)                                                            | bor        | b2182       | - | -  | C  | biochemical pathway efflux system                                                                                                                                                              |                                                                 |
| SNP | 2279134 | T->G | F427T(TTC->GTC)                                                            | yeeH       | b2184       | - | -  | -  | C                                                                                                                                                                                              | predicted ATP-dependent DNA or RNA helicase                     |
| SNP | 2279561 | A->C | E580A(GAA->GCA)                                                            | yeeH       | b2186       | - | -  | -  | C                                                                                                                                                                                              | predicted ATP-dependent DNA or RNA helicase                     |
| SNP | 2280501 | T->G | R224P(CAG->CCG)                                                            | yeeK       | b2186       | - | -  | -  | C                                                                                                                                                                                              | nucleoside-associated protein                                   |
| SNP | 2282031 | T->G | V144V(GTT->GTC)                                                            | yeeH       | b2188       | - | -  | G  | G                                                                                                                                                                                              | predicted hydrolyase, inner membrane                            |
| SNP | 2284021 | A->C | L150P(TAT->GAT)                                                            | ccsB       | b2201       | - |    |    |                                                                                                                                                                                                |                                                                 |

|     |         |     |                           |           |             |   |   |   |                                                                                                                                                          |                                                                                                                        |                                                                                                                                           |
|-----|---------|-----|---------------------------|-----------|-------------|---|---|---|----------------------------------------------------------------------------------------------------------------------------------------------------------|------------------------------------------------------------------------------------------------------------------------|-------------------------------------------------------------------------------------------------------------------------------------------|
| SNP | 251483  | T-C | ET3H(GAA→GAG)             | xapR      | b2405       | C | C | C | DNA-binding transcriptional activator for xapB                                                                                                           |                                                                                                                        |                                                                                                                                           |
| SNP | 251481  | A-C | 1261(AAT→ACT)             | xapB      | b2407       | - | - | - | purine nucleoside phosphorylase I                                                                                                                        |                                                                                                                        |                                                                                                                                           |
| SNP | 251516  | A-C | F196G(TTC→TGC)            | xapA      | b2407       | C | C | C | purine nucleoside phosphorylase II                                                                                                                       |                                                                                                                        |                                                                                                                                           |
| SNP | 252160  | G-A | intergenic (158/191)      | xapA/yfeN | b2407/b2408 | - | A | A | purine nucleoside phosphorylase II/hypredicted outer membrane protein                                                                                    |                                                                                                                        |                                                                                                                                           |
| SNP | 252168  | C-T | CG2(DNA→GAG)              | yfeT      | -           | - | - | - | predicted DNA-binding transcriptional regulator                                                                                                          |                                                                                                                        |                                                                                                                                           |
| SNP | 2524006 | C-T | E25E(GAG→GAA)             | yfeR      | b2409       | T | T | T | predicted DNA-binding transcriptional regulator                                                                                                          |                                                                                                                        |                                                                                                                                           |
| SNP | 2527108 | A-G | V98A(GTG→GGC)             | lgaI      | b2411       | - | G | G | DNA ligase, NAD(+)-dependent                                                                                                                             |                                                                                                                        |                                                                                                                                           |
| SNP | 2528348 | A-C | D211A(TTG→TGT)            | cysZ      | b2413       | - | C | C | predicted inner membrane protein                                                                                                                         |                                                                                                                        |                                                                                                                                           |
| SNP | 2531986 | A-C | N233H(AAC→CAC)            | ptg       | b2416       | - | - | - | PEP-protein phosphotransferase of PTS system (enzyme I)                                                                                                  |                                                                                                                        |                                                                                                                                           |
| SNP | 2531448 | A-C | H114L(TC→CTC)             | crn       | b2417       | - | - | - | glucose-specific enzyme IIA component of PTS                                                                                                             |                                                                                                                        |                                                                                                                                           |
| SNP | 2531700 | A-C | N817A(GAC→GCA)            | cysA      | b2422       | G | G | G | sulfate/thiosulfate transporter subunit                                                                                                                  |                                                                                                                        |                                                                                                                                           |
| SNP | 2537771 | T-C | T80A(ACG→GGC)             | cysA      | b2422       | - | - | - | sulfate/thiosulfate transporter subunit                                                                                                                  |                                                                                                                        |                                                                                                                                           |
| SNP | 2549646 | A-C | S275(TCA→TCC)             | ama       | b2435       | - | - | - | N-acetylmethyl-L-alanine amidase I                                                                                                                       |                                                                                                                        |                                                                                                                                           |
| SNP | 2553952 | T-G | E117G(GAC→GAG)            | eucC      | b2440       | G | C | C | ethanolamine mono-lyase, small subunit (light chain)                                                                                                     |                                                                                                                        |                                                                                                                                           |
| SNP | 2559630 | A-C | D99A(GAT→GCT)             | yfD       | b2446       | - | - | - | CP2.55 prophage; predicted protein                                                                                                                       |                                                                                                                        |                                                                                                                                           |
| DEL | 2560940 | Δ   | coding (125/378 nt)       | yfR2      | b2448       | - | Δ | Δ | CP2.55 prophage; predicted protein                                                                                                                       |                                                                                                                        |                                                                                                                                           |
| SNP | 2561075 | T-G | V97G(TGC→GGC)             | yfR2      | b2448       | - | - | - | CP2.55 prophage; predicted protein                                                                                                                       |                                                                                                                        |                                                                                                                                           |
| SNP | 2563735 | T-G | D334A(GAC→GCC)            | eucG      | b2453       | G | G | G | ethanol dehydrogenase involved in ethanolamine utilization; aldehyde reductase, converts acetaldehyde to ethanol                                         |                                                                                                                        |                                                                                                                                           |
| SNP | 2570396 | A-C | V65G(GTC→GGC)             | eucD      | b2458       | - | - | - | phosphate acetyltransferase                                                                                                                              |                                                                                                                        |                                                                                                                                           |
| SNP | 2573023 | T-G | K30A(AA→CAA)              | eucS      | b2462       | G | G | G | predicted carboxymethyl structural protein with predicted role in ethanol utilization                                                                    |                                                                                                                        |                                                                                                                                           |
| SNP | 2573620 | T-C | E61G(ACA→GGA)             | mseB      | b2463       | C | C | C | fused malic enzyme predicted oxidoreductase/predicted phosphotransferase                                                                                 |                                                                                                                        |                                                                                                                                           |
| SNP | 2573821 | A-C | F58A(TTT→TTG)             | mseB      | b2463       | - | - | - | fused malic enzyme predicted oxidoreductase/predicted phosphotransferase                                                                                 |                                                                                                                        |                                                                                                                                           |
| SNP | 2574776 | A-C | E27G(GAA→GCA)             | mseB      | b2463       | - | - | - | fused malic enzyme predicted oxidoreductase/predicted phosphotransferase                                                                                 |                                                                                                                        |                                                                                                                                           |
| SNP | 2575334 | A-C | V23G(GTT→GGT)             | mseB      | b2463       | - | - | - | fused malic enzyme predicted oxidoreductase/predicted phosphotransferase                                                                                 |                                                                                                                        |                                                                                                                                           |
| SNP | 2575953 | T-G | S23Y(TTC→ACC)             | talA      | b2464       | - | - | - | transaldolase A                                                                                                                                          |                                                                                                                        |                                                                                                                                           |
| SNP | 2580907 | T-C | T615A(ACC→GCC)            | aegA      | b2468       | C | C | C | fused predicted oxidoreductase: Fe5 binding subunit/NAD/FAD binding subunit                                                                              |                                                                                                                        |                                                                                                                                           |
| SNP | 2582838 | T-C | intergenic (89/267)       | aegA/narX | b2468/b2469 | C | C | C | fused predicted oxidoreductase: Fe5 binding subunit/NAD/FAD binding subunit/sensory histidine kinase in two-component regulatory system with NarP (NarI) |                                                                                                                        |                                                                                                                                           |
| SNP | 2583761 | A-C | intergenic (141/488)      | acdY/yfj  | b2470/b2466 | - | - | - | CP2.55 prophage; predicted protein                                                                                                                       |                                                                                                                        |                                                                                                                                           |
| SNP | 2583837 | T-G | intergenic (277/104)      | yfRm/yfB  | b4606/b2471 | G | G | G | hypothetical protein/predicted reductase, function unknown, ArsC family; low abundance protein                                                           |                                                                                                                        |                                                                                                                                           |
| SNP | 2596158 | T-C | D276G(GAC→GGC)            | dapA      | b2478       | C | C | C | dihydrodipicolinate synthase                                                                                                                             |                                                                                                                        |                                                                                                                                           |
| SNP | 2597350 | G-A | N103A(GAG→GTA)            | hyb       | b2482       | - | - | - | hydrogenase 4, membrane subunit                                                                                                                          |                                                                                                                        |                                                                                                                                           |
| SNP | 2602181 | T-G | M416H(ATG→AGG)            | hyfD      | b2484       | - | - | - | hydrogenase 4, membrane subunit                                                                                                                          |                                                                                                                        |                                                                                                                                           |
| SNP | 2603666 | T-C | S63P(TTC→CCC)             | hyfE      | b2485       | C | C | C | hydrogenase 4, membrane subunit                                                                                                                          |                                                                                                                        |                                                                                                                                           |
| SNP | 2606470 | T-G | E117G(GAC→GAG)            | hyfF      | b2486       | G | C | C | hydrogenase 4, membrane subunit                                                                                                                          |                                                                                                                        |                                                                                                                                           |
| SNP | 2607424 | A-G | T134A(ACC→GCC)            | hyfH      | b2488       | G | G | G | hydrogenase 4, Fe-S subunit                                                                                                                              |                                                                                                                        |                                                                                                                                           |
| SNP | 2609518 | A-C | Q132P(ACA→CCA)            | hyr       | b2491       | - | - | - | DNA-binding transcriptional activator, formate sensing                                                                                                   |                                                                                                                        |                                                                                                                                           |
| SNP | 2609524 | G-A | Y134A(GAG→GTA)            | hyr       | b2491       | - | - | - | DNA-binding transcriptional activator, formate sensing                                                                                                   |                                                                                                                        |                                                                                                                                           |
| SNP | 2609938 | T-G | L272H(CTT→CGT)            | hyr       | b2491       | - | - | - | DNA-binding transcriptional activator, formate sensing                                                                                                   |                                                                                                                        |                                                                                                                                           |
| SNP | 2614609 | T-G | I326A(TAC→CTC)            | uraA      | b2497       | - | - | - | G                                                                                                                                                        | uracil permease                                                                                                        |                                                                                                                                           |
| SNP | 2616594 | T-G | H244C(ACC→GCC)            | uraA      | b2497       | - | - | - | G                                                                                                                                                        | uracil permease                                                                                                        |                                                                                                                                           |
| SNP | 2618851 | A-C | E106A(GAA→GCA)            | purM      | b2499       | - | - | - | -                                                                                                                                                        | phosphoribosylaminimidazole synthetase                                                                                 |                                                                                                                                           |
| DEL | 2620170 | Δ   | intergenic (174/38)       | purN/ppk  | b2500/b2501 | - | Δ | Δ | phosphoribosylglycylamide formyltransferase 1/polyphosphate kinase, component of RNA degradingosome                                                      |                                                                                                                        |                                                                                                                                           |
| DEL | 2636377 | Δ   | coding (213/611 nt)       | yfM       | b2513       | - | Δ | Δ | conserved protein; fliP/9070 family                                                                                                                      |                                                                                                                        |                                                                                                                                           |
| SNP | 2648602 | C-T | D30M(GAT→AAT)             | yfM       | b2520       | T | T | T | conserved protein                                                                                                                                        |                                                                                                                        |                                                                                                                                           |
| SNP | 2649382 | T-G | N44H(ACC→CAC)             | yfM       | b2520       | G | G | G | conserved protein                                                                                                                                        |                                                                                                                        |                                                                                                                                           |
| SNP | 2649889 | A-G | R184C(ACC→GCC)            | ssa       | b2521       | - | - | - | 3-mercaptopyruvate sulfurtransferase                                                                                                                     |                                                                                                                        |                                                                                                                                           |
| SNP | 2650280 | G-A | R188H(CGC→CAC)            | ssa       | b2521       | - | - | - | 3-mercaptopyruvate sulfurtransferase                                                                                                                     |                                                                                                                        |                                                                                                                                           |
| SNP | 2651952 | A-G | Y206T(ATT→GTT)            | hcrT      | b2522       | - | Δ | Δ | glutathione-like enzyme; sulfur transfer from acetyl-CoA synthetase                                                                                      |                                                                                                                        |                                                                                                                                           |
| SNP | 2655486 | T-G | intergenic (133/131)      | iscR/hmj  | b2531/b2532 | C | C | C | DNA-binding transcriptional repressor/rRNA mC32/mL32 methyltransferase, SAM-dependent                                                                    |                                                                                                                        |                                                                                                                                           |
| SNP | 2660550 | T-C | intergenic (3/116)        | trmJ/subJ | b2532/b2533 | C | C | C | rRNA mC32/mL32 methyltransferase, SAM-dependent/inositol monophosphatase                                                                                 |                                                                                                                        |                                                                                                                                           |
| DEL | 2664800 | Δ   | coding (271/140 nt)       | hcr       | b2536       | - | - | - | predicted 3-glyoxylate transporter                                                                                                                       |                                                                                                                        |                                                                                                                                           |
| SNP | 2673775 | A-G | V92A(GTG→GGC)             | yfD       | b2546       | G | G | G | predicted sugar transporter subunit; membrane component of ABC superfamily                                                                               |                                                                                                                        |                                                                                                                                           |
| SNP | 2681724 | A-C | A338A(GTC→GGC)            | glaY      | b2551       | - | - | - | C                                                                                                                                                        | serine hydroxymethyltransferase                                                                                        |                                                                                                                                           |
| SNP | 2682517 | T-C | intergenic (181/142)      | glaY/nmp  | b2551/b2552 | - | - | - | C                                                                                                                                                        | serine hydroxymethyltransferase/fused nitric oxide dioxygenase/dihydropyridine reductase 2                             |                                                                                                                                           |
| SNP | 2686660 | A-C | L248H(TGC→GGC)            | yfG       | b2555       | - | - | - | -                                                                                                                                                        | conserved protein                                                                                                      |                                                                                                                                           |
| SNP | 2687787 | T-C | E397E(GAA→GAG)            | gfrK      | b2556       | - | - | - | -                                                                                                                                                        | C                                                                                                                      | Sensor protein kinase regulating glrK rRNA in two-component system with response regulator GRR                                            |
| SNP | 2688707 | T-G | intergenic (145/113)      | gfrK/purL | b2556/b2557 | - | - | - | -                                                                                                                                                        | C                                                                                                                      | Sensor protein kinase regulating glrK rRNA in two-component system with response regulator GRR/phosphoribosylformylglycinamide synthetase |
| SNP | 2692434 | A-C | Y112D(TAC→GAC)            | purL      | b2557       | - | - | - | -                                                                                                                                                        | C                                                                                                                      | phosphoribosylformylglycinamide synthetase                                                                                                |
| SNP | 2692713 | T-G | intergenic (146/128)      | yfH/ashB  | b2562/b4687 | - | - | - | -                                                                                                                                                        | G                                                                                                                      | predicted 4Fe-4S cluster-containing protein/outer membrane protein                                                                        |
| SNP | 2703390 | T-G | E120A(GAG→GTA)            | lgaA      | b2569       | - | - | - | -                                                                                                                                                        | C                                                                                                                      | beta-translucanase/flagellin factor/H4, CTXase                                                                                            |
| SNP | 2705362 | A-C | L206V(ATT→GTG)            | rseB      | b2571       | - | - | - | -                                                                                                                                                        | C                                                                                                                      | anti-sigma E factor, binds RseA                                                                                                           |
| SNP | 2705731 | A-G | V93A(GTG→GGC)             | rseB      | b2571       | - | - | - | -                                                                                                                                                        | G                                                                                                                      | anti-sigma E factor, binds RseA                                                                                                           |
| SNP | 2708908 | T-G | L419A(TTC→GTC)            | naeB      | b2574       | - | - | - | -                                                                                                                                                        | C                                                                                                                      | quinolinate synthase 1, separate oxidase (B protein) subunit                                                                              |
| SNP | 2712108 | T-C | Y146G(TAT→TGT)            | yfE       | b2577       | C | C | C | predicted DNA-binding transcriptional regulator                                                                                                          |                                                                                                                        |                                                                                                                                           |
| SNP | 2717705 | G-A | intergenic (137/273)      | yfU/yng   | b2579/b2580 | A | A | A | A                                                                                                                                                        | autonomous glycol radical cofactor/uracil DNA glycosylase                                                              |                                                                                                                                           |
| DEL | 2719041 | Δ   | coding (71/203 nt)        | yfF       | b2581       | - | - | - | -                                                                                                                                                        | Δ                                                                                                                      | predicted methyltransferase                                                                                                               |
| SNP | 2715822 | T-G | intergenic (170/137)      | yfI/trxC  | b2581/b2582 | - | - | - | -                                                                                                                                                        | G                                                                                                                      | predicted methyltransferase/thioredoxin 2                                                                                                 |
| SNP | 2718105 | C-T | S30L(CTA→TTA)             | yfQ       | b2584       | T | T | T | T                                                                                                                                                        | T                                                                                                                      | inhibiting acetyltransferase for acetyl-CoA synthetase                                                                                    |
| SNP | 2718198 | A-T | E184A(TGC→GGC)            | yfQ       | b2584       | - | - | - | -                                                                                                                                                        | Δ                                                                                                                      | inhibiting acetyltransferase for acetyl-CoA synthetase                                                                                    |
| SNP | 2734184 | T-G | intergenic (177/194)      | bamD/raA  | b2595/b2597 | G | G | G | G                                                                                                                                                        | lipoprotein required for OME biosynthesis, in BamABCD complex/cold shock protein associated with 30S ribosomal subunit |                                                                                                                                           |
| SNP | 2734310 | A-C | intergenic (120/148)      | bamD/raA  | b2595/b2597 | C | C | C | C                                                                                                                                                        | lipoprotein required for OME biosynthesis, in BamABCD complex/cold shock protein associated with 30S ribosomal subunit |                                                                                                                                           |
| SNP | 2734362 | T-G | H238T(CAT→TAT)            | tyrA      | b2600       | A | A | A | A                                                                                                                                                        | MOB                                                                                                                    | fused chorismate mutase 1/zephrinate dehydrogenase                                                                                        |
| MOB | 2736031 | Δ   | coding (208/77 nt)        | yfL       | b2602       | - | - | - | -                                                                                                                                                        | Δ                                                                                                                      | lipoprotein                                                                                                                               |
| SNP | 2736631 | A-C | N9H(AAT→CAT)              | ripN      | b2604       | C | C | C | C                                                                                                                                                        | C                                                                                                                      | probable inner membrane diguanylate cyclase                                                                                               |
| SNP | 2741372 | T-G | K80Q(AAA→CAA)             | rpsP      | b2609       | - | - | - | -                                                                                                                                                        | G                                                                                                                      | 30S ribosomal subunit protein S16                                                                                                         |
| SNP | 2741449 | A-G | intergenic (114/100)      | ffb       | b2610       | - | - | - | -                                                                                                                                                        | C                                                                                                                      | Signal Recognition Particle (SRP) component with 4.5S RNA (fts)                                                                           |
| SNP | 2747156 | A-T | I372H(TAC→TTC)            | yfT       | b4461       | T | T | T | T                                                                                                                                                        | T                                                                                                                      | inner membrane protein, LPP0503 family                                                                                                    |
| SNP | 2751219 | T-C | intergenic (163/164)      | smfB/mntA | b2620/b2622 | - | - | - | -                                                                                                                                                        | A                                                                                                                      | trans-translation protein/CP4.5 prophage; integrase                                                                                       |
| SNP | 2751472 | G-A | E188G(GGG→GGG)            | yfK       | b2627       | - | - | - | -                                                                                                                                                        | A                                                                                                                      | CP4.5 prophage; conserved protein                                                                                                         |
| SNP | 2758791 | T-G | E658D(GAA→GAG)            | yfK       | b2627       | - | - | - | -                                                                                                                                                        | A                                                                                                                      | CP4.5 prophage; conserved protein                                                                                                         |
| SNP | 2760012 | T-C | CG215G(GGA→GGG)           | yfK       | b2627       | - | - | - | -                                                                                                                                                        | C                                                                                                                      | CP4.5 prophage; conserved protein                                                                                                         |
| INS | 2763011 | -C  | intergenic (131/131)      | yfM/mntA  | b2629/b2630 | - | - | - | -                                                                                                                                                        | -                                                                                                                      | CP4.5 prophage; predicted protein/CP4.5 prophage; RNase LS                                                                                |
| SNP | 2764735 | T-C | intergenic (156/199)      | ribJ/yfP  | b2631/b2632 | C | C | C | C                                                                                                                                                        | CP4.5 prophage; predicted protein/CP4.5 prophage; predicted GTP-binding protein                                        |                                                                                                                                           |
| SNP | 2767825 | T-C | F105Y(TTC→CTC)            | yarK      | b2635       | C | C | C | C                                                                                                                                                        | CP4.5 prophage; predicted inner membrane protein                                                                       |                                                                                                                                           |
| SNP | 2772154 | A-C | E181A(GAC→GCA)            | yfW       | b2642       | C | C | C | C                                                                                                                                                        | CP4.5 prophage; predicted inner membrane protein                                                                       |                                                                                                                                           |
| SNP | 2774538 | A-C | E67A(GAA→GCA)             | yfZ       | b2645       | C | C | C | C                                                                                                                                                        | CP4.5 prophage; antitoxin of the YnfP-YnfN toxin-antitoxin system                                                      |                                                                                                                                           |
| SNP | 2775602 | T-C | E1450G(GAG→GGG)           | yfA       | b2647       | - | - | - | -                                                                                                                                                        | C                                                                                                                      | adhesin-like autotransporter                                                                                                              |
| SNP | 2776150 | C-T | intergenic (106/77 nt)    | yfA       | b2647       | - | - | - | -                                                                                                                                                        | T                                                                                                                      | adhesin-like autotransporter                                                                                                              |
| SNP | 2781140 | T-C | pseudogene (1096/1378 nt) | ypjC      | b2650       | - | - | - | -                                                                                                                                                        | -                                                                                                                      | pseudogene                                                                                                                                |
| SNP | 2782113 | A-G | pseudogene (1237/1374 nt) | ypjC      | b2650       | - | - | - | -                                                                                                                                                        | G                                                                                                                      | pseudogene                                                                                                                                |
| SNP | 2786050 | A-G | intergenic (117/118 nt)   | yedQ/cdb  | b4462/b2659 | - | - | - | -                                                                                                                                                        | G                                                                                                                      | predicted protein; putative enzyme/Carbon starvation induced gene                                                                         |
| SNP | 2787500 | A-C | K333T(AAA→ACA)            | gabD      | b2661       | C | C | C | C                                                                                                                                                        | C                                                                                                                      | succinate semialdehyde dehydrogenase I, NADP-dependent                                                                                    |
| INS | 2791387 | -A  | intergenic (146/160)      | gabT/gabP | b2662/b2663 | - | - | - | -                                                                                                                                                        | A                                                                                                                      | 4-aminobutyrate aminotransferase, PEP-dependent/gamma-aminobutyrate transporter                                                           |
| DEL | 2793580 | C-T | E188G(GGG→GGC)            | gabF      | b2663       | T | T | T | T                                                                                                                                                        | T                                                                                                                      | gamma-aminobutyrate transporter                                                                                                           |
| SNP | 2793648 | G-A | D24D(AGC→GAT)             | stpA      | b2669       | - | - | - | -                                                                                                                                                        | Δ                                                                                                                      | DNA binding protein, nucleoid-associated                                                                                                  |
| DEL | 2797835 | Δ   | coding (147/140/141 nt)   | nrdE      | b2674       | - | - | - | -                                                                                                                                                        | Δ                                                                                                                      | Flavodoxin required for N-fixid cluster assembly                                                                                          |
| SNP | 2800564 | -T  | intergenic (195/210 nt)   | nrdE      | b2675       | - | - | - | -                                                                                                                                                        | -                                                                                                                      | Flavodoxin required for N-fixid cluster assembly                                                                                          |
| SNP | 2800871 | C-T | T89H(CTC→ATT)             | nrdF      | b2676       | T | T | T | T                                                                                                                                                        | T                                                                                                                      | ribonucleoside-diphosphate reductase 2, beta subunit, ferritin-like protein                                                               |
| SNP | 2800874 | T-C | V50N(GAT→AGC)             | nrdF      | b2676       | C | C | C | C                                                                                                                                                        | C                                                                                                                      | ribonucleoside-diphosphate reductase 2, beta subunit, ferritin-like protein                                                               |
| SNP | 2803831 | G-A | V200N(CTC→ATC)            | prwW      | b2678       | A | A | A | A                                                                                                                                                        | A                                                                                                                      | glycine betaine transporter subunit                                                                                                       |
| SNP | 2805636 | T-G | pseudogene (97/1178 nt)   | ygaY      | b2681       | - | - | - | -                                                                                                                                                        | -                                                                                                                      | predicted transporter (pseudogene)/putative transporter; Not classified; putative transport protein                                       |
| SNP | 2805944 | A-C | intergenic (105/178 nt)   | ygaY      | b2681       | - | - | - | -                                                                                                                                                        | G                                                                                                                      | predicted transporter (lipoprotein)/putative transporter; Not classified; putative transport protein                                      |
| SNP | 2808822 | G-A | AS8T(GCA→ACA)             | errA      | b2685       | - | - | - | -                                                                                                                                                        | A                                                                                                                      | multidrug efflux system                                                                                                                   |
| SNP | 2809301 | T-C | R237P(TGC→ATC)            | errA      | b2685       | - | - | - | -                                                                                                                                                        | C                                                                                                                      | multidrug efflux system                                                                                                                   |
| SNP | 2809398 | T-C | A33A(GCC→GGC)             | errB      | b2686       | - | - | - | -                                                                                                                                                        | G                                                                                                                      | multidrug efflux system                                                                                                                   |
| SNP | 2820868 | A-G | S42S(TCT→TCC)             | recA      | b2699       | G | G | G | G                                                                                                                                                        | G                                                                                                                      | DNA strand exchange and recombination protein with protease and nuclease activity                                                         |
| SNP | 2821688 | A-C | intergenic (118/127)      | ygdD/mfb  | b2700/b2701 | - | - | - | -                                                                                                                                                        | C                                                                                                                      | conserved protein/membrane-bound lytic murein transglycosylase B                                                                          |
| SNP | 2821807 | A-G | intergenic (125/294)      | mfb       | b2701       | - | - | - | -                                                                                                                                                        | -                                                                                                                      | membrane-bound lytic murein transglycosylase B                                                                                            |
| SNP | 2822501 | T-G | P100P(ACA→CCC)            | mfb       | b2701       | - | - | - | -                                                                                                                                                        | G                                                                                                                      | membrane-bound lytic murein transglycosylase B                                                                                            |
| SNP | 2822404 | A-C | Q50P(CAG→CCG)             | srfA      | b2702       | - | - | - | -                                                                                                                                                        | C                                                                                                                      | glutathionyl-specific enzyme IIC component of PTS                                                                                         |
| SNP | 2824379 | T-G | D22A(TTC→GGC)             | srfE      | b2703       | - | - | - | -                                                                                                                                                        | G                                                                                                                      | glutathionyl-specific enzyme IIB component of PTS                                                                                         |
| INS | 2828916 | -T  | coding (598/1515 nt)      | norR      | b2709       | - | - | - | -                                                                                                                                                        | -                                                                                                                      | Anaerobic nitric oxide reductase DNA-binding transcriptional activator                                                                    |
| SNP | 2830696 | A-C | Q73H(ACA→CAC)             | ascF      | b2715       | C | C | C | C                                                                                                                                                        | C                                                                                                                      | fused cellobiose/arbutin/salicyl-specific PTS enzymes: IIB component/C component                                                          |
| SNP | 2831111 | A-C | intergenic (106/77 nt)    | ascF      | b2715       | - | - | - | -                                                                                                                                                        | -                                                                                                                      | fused cellobiose/arbutin/salicyl-specific PTS enzymes: IIB component/C component                                                          |
| SNP | 2841829 | A-C | C50S(GTC→GGC)             | hyfF      | b2720       | - | - | - | -                                                                                                                                                        | -                                                                                                                      | formate hydroxylase complex inner-sulfur protein                                                                                          |
| SNP | 2842483 | G-A | S42S(TCT→TCC)             | hyeE      | b2721       | - | - | - | -                                                                                                                                                        | A                                                                                                                      | hydrogenase 3, large subunit                                                                                                              |
| SNP | 2846205 | T-G | E137A(GTC→GGC)            | hyeB      | b2724       | - | - | - | -                                                                                                                                                        | A                                                                                                                      | hydrogenase 3, S subunit                                                                                                                  |
| SNP | 2847230 | G-A | G144*(CAA→TAA)            | hyaA      | b2725       | A | A | A | A                                                                                                                                                        | A                                                                                                                      | regulator of the transcriptional regulator FHA                                                                                            |
| INS | 2852408 | -T  | coding (84/2079 nt)       | rhaA      | b2731       | - | - | - | -                                                                                                                                                        | -                                                                                                                      | DNA-binding transcriptional activator                                                                                                     |
| SNP | 2853150 | T-C | R65A(GAT→GCA)             | rhaA      | b2731       | - | - | - | -                                                                                                                                                        | -                                                                                                                      | DNA-binding transcriptional activator                                                                                                     |
| SNP | 2854737 | A-C | D100Q(GAC→GGC)            | ppbB      | b2734       | - | - | - | -                                                                                                                                                        | G                                                                                                                      | serine/threonine-specific protein phosphatase 2                                                                                           |
| SNP | 2858626 | T-G | L178H(CTC→GCA)            | trbD      | b2736       | - | - | - | -                                                                                                                                                        | -                                                                                                                      | predicted dehydrogenase, with NAD(P)+ binding Rossmann fold domain                                                                        |
| SNP | 2862739 | C-T | intergenic (149/14)       | glnA/ygdP | b2741/b2742 | - | - | - | -                                                                                                                                                        | -                                                                                                                      | RNA polymerase, sigma 5 (sigma 38) factor/tyrosine Amino acid N-acetyltransferase                                                         |
| SNP | 2865559 | T-G | D142A(GAT→GCA)            | yruJ      | b2745       | - | - | - | -                                                                                                                                                        | -                                                                                                                      | r                                                                                                                                         |

|     |         |     |                                |           |             |    |    |     |                                                                                                                                                                                                 |
|-----|---------|-----|--------------------------------|-----------|-------------|----|----|-----|-------------------------------------------------------------------------------------------------------------------------------------------------------------------------------------------------|
| SNP | 3109393 | T-C | D1380(GAC-GGG)                 | ygdH      | b2968       | -  | C  | C   | predicted secretion pathway M type protein, membrane anchored                                                                                                                                   |
| DEL | 3109393 | del | coding (648/660 nt)            | ygdH      | b4466       | -  | -  | del | predicted inner membrane lipoprotein                                                                                                                                                            |
| SNP | 3113101 | T-G | K231Q(AAA-CAA)                 | yjHJ      | b4466       | G  | G  | G   | predicted inner membrane lipoprotein                                                                                                                                                            |
| SNP | 3113148 | A-C | L331I(TTA-GTA)                 | glfF      | b4467       | -  | -  | -   | glyoxylate oxidase 4Fe-4S iron-sulfur cluster subunit                                                                                                                                           |
| SNP | 3120099 | T-G | L331I(TTA-GTA)                 | glfE      | b4468       | -  | -  | -   | glyoxylate oxidase FAD binding subunit                                                                                                                                                          |
| SNP | 3121566 | A-C | L379V(TTA-GTA)                 | glcD      | b2979       | C  | C  | C   | glyoxylate oxidase subunit, FAD-linked                                                                                                                                                          |
| SNP | 3122161 | T-C | D176I(GAC-GGG)                 | glcD      | b2979       | C  | C  | C   | glyoxylate oxidase subunit, FAD-linked                                                                                                                                                          |
| SNP | 3122822 | T-C | intergenic (1327/1258)         | glcE      | b2982/b2980 | C  | C  | C   | glyoxylate oxidase subunit, FAD-linked/DNA-binding transcriptional dual regulator, glycylate-binding                                                                                            |
| SNP | 3123969 | T-G | intergenic (456/511)           | inhA/ygdH | b2982/b2983 | G  | G  | G   | ISS transposase and trans-activator/predicted inner membrane protein                                                                                                                            |
| SNP | 3130248 | A-C | F208I(TTC-TGC)                 | piB       | b2987       | C  | C  | C   | phosphate transporter                                                                                                                                                                           |
| SNP | 3131618 | T-C | L684K(GAC-TGC)                 | hyrC      | b2994       | -  | -  | -   | hydrogenase 2, large subunit                                                                                                                                                                    |
| SNP | 3137339 | C-T | Q110Q(CAG-CAA)                 | hyrC      | b2994       | T  | T  | T   | hydrogenase 2, large subunit                                                                                                                                                                    |
| SNP | 3139053 | C-T | G2170(GCC-GAC)                 | hyrA      | b2996       | -  | -  | -   | hydrogenase 2 4Fe-4S ferredoxin type component                                                                                                                                                  |
| SNP | 3144163 | T-C | intergenic (1341/170)          | ygdH/ygdA | b3002/b3003 | C  | C  | C   | predicted inner membrane protein, UPPF14 family/predicted oxidoreductase                                                                                                                        |
| INS | 3151580 | +A  | coding (278/828 nt)            | dkgA      | b3012       | -  | +A | +A  | 2,5-diketo-D-glucuronate reductase A                                                                                                                                                            |
| SNP | 3151953 | T-G | S62N(GAC-TGC)                  | yjQ       | b4469       | G  | G  | G   | conserved protein                                                                                                                                                                               |
| SNP | 3151917 | A-G | S35T(TTC)                      | yjQ       | b4469       | G  | G  | G   | conserved protein                                                                                                                                                                               |
| SNP | 3151972 | T-G | K47N(AAA-AGA)                  | parC      | b3019       | G  | G  | G   | DNA topoisomerase IV, subunit A                                                                                                                                                                 |
| DEL | 3171283 | del | penicillinase (407/408/631 nt) | nuoF      | b3034       | -  | -  | del | ADP-ribose pyrophosphatase                                                                                                                                                                      |
| SNP | 3171549 | A-G | E162I(GAA-AGA)                 | yjB       | b3037       | G  | G  | G   | conserved protein, UPPF463 family                                                                                                                                                               |
| SNP | 3175601 | A-G | E167I(GAA-AGA)                 | yjC       | b3038       | G  | G  | G   | Glutathionylperoxidase synthase homolog                                                                                                                                                         |
| SNP | 3182999 | T-C | penicillinase (2257/2803 nt)   | yjB       | b3046       | -  | -  | -   | penicillinase; outer membrane usher homology;putative membrane; Not classified, putative membrane protein                                                                                       |
| SNP | 3191212 | T-G | H737I(TAT-TCT)                 | glE       | b3053       | -  | -  | -   | fused deoxyribose/transferase/adenyltransferase for glutamine synthetase                                                                                                                        |
| SNP | 3191449 | A-C | M66H(ATG-AGG)                  | yjF       | b3054       | C  | C  | C   | predicted adenylate cyclase                                                                                                                                                                     |
| SNP | 3191487 | A-G | F120L(TTC-TCT)                 | baeA      | b3057       | G  | G  | G   | undecylsuccinyl pyrophosphate phosphatase                                                                                                                                                       |
| SNP | 3213986 | A-G | H92V(ATC-GTC)                  | ebgA      | b3076       | G  | G  | G   | cryptic beta-D-galactosidase, alpha subunit                                                                                                                                                     |
| SNP | 3222766 | T-G | W96G(GC-GGG)                   | yjJ       | b3079       | G  | G  | G   | conserved protein                                                                                                                                                                               |
| SNP | 3223936 | A-G | V207I(GTC-TGC)                 | rimD      | b3084       | G  | G  | G   | 23S rRNA-mG1835 methyltransferase, SAM dependent                                                                                                                                                |
| SNP | 3230227 | A-G | V110N(GTG-GGG)                 | rimG      | b3084       | G  | G  | G   | 23S rRNA-mG1835 methyltransferase, SAM dependent                                                                                                                                                |
| SNP | 3231161 | A-C | intergenic (181/59)            | ygpY/yjQ  | b3085/b3086 | -  | -  | -   | predicted metal dependent hydrolase/conserved protein, SaaA family, DUF218 superfamily                                                                                                          |
| SNP | 3232284 | A-G | Y124I(TAT-AGG)                 | mitD      | b3088/b3089 | G  | G  | G   | inner membrane protein, part of ferredoxin/sodium/cerium/brethione symporter                                                                                                                    |
| INS | 3235657 | +G  | coding (1034/1245 nt)          | sstI      | b3089       | -  | +G | +G  | sodium/sulfur/brethione symporter                                                                                                                                                               |
| SNP | 3239868 | T-G | K152Q(AAA-CAA)                 | uxcX      | b3092       | -  | -  | -   | urate ionomerase                                                                                                                                                                                |
| SNP | 3239902 | T-G | intergenic (1271/80)           | uxcX/uxcT | b3092/b3093 | G  | G  | G   | urate ionomerase/uracinate dehydrogenase transporter                                                                                                                                            |
| SNP | 3240480 | C-T | H233I(CAT-TAT)                 | exuT      | b3093       | T  | T  | T   | neuramate transporter                                                                                                                                                                           |
| SNP | 3242437 | T-G | intergenic (129/161)           | exuR/yjgA | b3094/b3095 | G  | G  | G   | DNA-binding transcriptional repressor/required, with yjgH, for membrane integrity; inner membrane protein                                                                                       |
| SNP | 3248708 | G-A | L162I(TAT-TCT)                 | yjE       | b3105       | A  | A  | A   | N-acetylglucosamine-specific enzyme IIc component of PFS                                                                                                                                        |
| SNP | 3250447 | A-C | D295I(GAT-GAG)                 | yjAM      | b4470       | C  | C  | C   | conserved protein                                                                                                                                                                               |
| SNP | 3252618 | T-C | S25G(GAG-AGG)                  | yjAD      | b3110       | C  | C  | C   | predicted transporter                                                                                                                                                                           |
| SNP | 3252704 | A-G | intergenic (414/131)           | tsfC/tdcR | b4471/b3113 | G  | G  | G   | L-serine dehydratase/transcriptional regulator                                                                                                                                                  |
| SNP | 3260526 | G-A | G61G(GCC-GGT)                  | tdcB      | b3117       | A  | A  | A   | catabolic threonine dehydratase, PLP-dependent                                                                                                                                                  |
| SNP | 3261351 | T-G | E132A(GAA-AGA)                 | tdcA      | b3118       | -  | -  | -   | DNA-binding transcriptional activator                                                                                                                                                           |
| SNP | 3261513 | A-G | E140K(AAG-AGC)                 | yjAC      | b3121       | -  | -  | -   | predicted protein                                                                                                                                                                               |
| SNP | 3273798 | G-A | G63G(GCC-AGC)                  | kbzA      | b3132       | A  | A  | A   | tagatase 6-phosphate aldolase 1, kbzA subunit                                                                                                                                                   |
| SNP | 3275409 | A-G | penicillinase (89/402 nt)      | agwV      | b3134       | -  | -  | -   | N-acetylglucosamine-specific enzyme IIc component of PFS, fragment (pseudogene)/enzyme; Central intermediary metabolism: Amino sugars; PFS system N: acetylglucosamine-specific; IC component 2 |
| INS | 3279140 | +T  | coding (1012/1245 nt)          | mir       | b3141       | +C | +C | +C  | ribonuclease G                                                                                                                                                                                  |
| SNP | 3284888 | A-G | N332I(AAC-AGC)                 | yjAJ      | b3144       | G  | G  | G   | predicted outer membrane protein                                                                                                                                                                |
| SNP | 3285056 | A-G | L162I(TAT-TCT)                 | yjB       | b3147       | G  | G  | G   | conserved protein                                                                                                                                                                               |
| SNP | 3285808 | G-A | T243I(ACC-AACA)                | lpoA      | b3147       | A  | A  | A   | conserved protein                                                                                                                                                                               |
| SNP | 3292049 | A-C | D657I(GAT-TGC)                 | lpoA      | b3147       | -  | -  | -   | conserved protein                                                                                                                                                                               |
| SNP | 3292041 | A-C | L162I(TAT-TCT)                 | yjB       | b3147       | C  | C  | C   | conserved protein                                                                                                                                                                               |
| SNP | 3296484 | A-C | Y107I(TAT-TCT)                 | yjBU      | b3158       | -  | -  | -   | predicted nucleotide diphosphate-sugar epimerase                                                                                                                                                |
| SNP | 3296797 | C-T | R211I(GCC-TGC)                 | yjBU      | b3158       | -  | -  | -   | predicted peptidase (collagenase-like)                                                                                                                                                          |
| INS | 3299466 | +G  | coding (622/866 nt)            | mir       | b3161       | +C | +C | +C  | ribonuclease G                                                                                                                                                                                  |
| SNP | 3306409 | A-C | intergenic (454/104)           | rpsD/truB | b3165/b3166 | C  | C  | C   | 30S ribosomal subunit protein S15/rRNA U55 pseudouridine synthase                                                                                                                               |
| SNP | 3311826 | A-C | V127I(GTT-GTG)                 | nuaA      | b3169       | -  | -  | -   | transcription termination/antitermination L factor                                                                                                                                              |
| SNP | 3312112 | T-G | intergenic (151/205)           | metV/yjgG | b3171/b3172 | G  | G  | G   | N-6-methyllysine/lysine/lysine synthase                                                                                                                                                         |
| SNP | 3327245 | C-T | K376G(AAG-AAA)                 | yjBE      | b3184       | T  | T  | T   | predicted inner membrane permease                                                                                                                                                               |
| INS | 3327354 | +C  | coding (622/866 nt)            | yjBE      | b3184       | +C | +C | +C  | predicted inner membrane permease                                                                                                                                                               |
| SNP | 3334004 | T-G | intergenic (126/88)            | npr/yjBL  | b3206/b3207 | G  | G  | G   | ADP-ribose transferase/DNA ligase III asymmetry, periplasmic binding protein                                                                                                                    |
| SNP | 3334136 | A-G | T69A(GCC-GCC)                  | yjDL      | b3207       | G  | G  | G   | phosphohistidinol-protein-hexose phosphotransferase component of N-regulated PFS system (NprI)/predicted protein                                                                                |
| SNP | 3334365 | A-G | intergenic (206/264)           | elbC/yjFB | b3210/b3210 | G  | G  | G   | ADP-ribose transferase                                                                                                                                                                          |
| SNP | 3347961 | A-C | I257I(AAC-AGC)                 | yjCC      | b3211       | -  | -  | -   | predicted Fe-S oxidoreductase                                                                                                                                                                   |
| SNP | 3354764 | T-G | intergenic (146/28)            | gfr/yjCA  | b3216/b3215 | -  | -  | -   | periplasmic protein/predicted periplasmic chaperone protein                                                                                                                                     |
| SNP | 3361468 | T-C | L321I(GAT-TGC)                 | yjAC      | b3220       | -  | -  | -   | conserved protein                                                                                                                                                                               |
| SNP | 3366075 | A-G | Y894I(TAT-CAAT)                | nanT      | b3224       | G  | G  | G   | salicylic acid transporter                                                                                                                                                                      |
| SNP | 3368703 | T-G | E136A(GAA-AGA)                 | nanR      | b3226       | -  | -  | -   | DNA-binding transcriptional repressor of the nan operon, induced by salicylic acid                                                                                                              |
| SNP | 3370841 | T-C | K324I(GAT-TGC)                 | dczA      | b3227       | C  | C  | C   | predicted transporter                                                                                                                                                                           |
| SNP | 3372027 | A-G | V25A(TCC-GCC)                  | ssaA      | b3229       | G  | G  | G   | stringent starvation protein A                                                                                                                                                                  |
| INS | 3373939 | +C  | coding (738/1128 nt)           | yjHM      | b3232       | +C | +C | +C  | conserved protein with nucleoside triphosphate hydrolase domain                                                                                                                                 |
| SNP | 3374164 | T-G | L321I(GAT-TGC)                 | yjAC      | b3232       | -  | -  | -   | conserved protein with nucleoside triphosphate hydrolase domain                                                                                                                                 |
| SNP | 3377881 | A-C | V334I(GTA-GTC)                 | degS      | b3235       | C  | C  | C   | serine endoprotease, periplasmic                                                                                                                                                                |
| SNP | 3381338 | A-G | intergenic (151/205)           | aaeB      | b3240       | C  | C  | C   | p-hydroxybenzoic acid efflux system component                                                                                                                                                   |
| SNP | 3381585 | A-C | N428I(AAT-AAAG)                | aaeB      | b3240       | -  | -  | -   | p-hydroxybenzoic acid efflux system component                                                                                                                                                   |
| SNP | 3382653 | G-A | I72I(TCC-TAT)                  | aaeB      | b3240       | A  | A  | A   | p-hydroxybenzoic acid efflux system component                                                                                                                                                   |
| SNP | 3382854 | A-G | L162I(TAT-TCT)                 | yjB       | b3242       | -  | -  | -   | membrane protein, efflux system                                                                                                                                                                 |
| SNP | 3384290 | T-G | S31A(TCC-GGC)                  | yjER      | b3243       | -  | -  | -   | transcriptional regulator for aaexA operon                                                                                                                                                      |
| SNP | 3389386 | A-G | L469V(TTC-TGC)                 | aaeP      | b4472       | -  | -  | -   | conserved membrane protein, predicted transporter                                                                                                                                               |
| SNP | 3392139 | C-T | G113G(GCC-AGC)                 | rrb       | b3247       | T  | T  | T   | ribonuclease G                                                                                                                                                                                  |
| SNP | 3394215 | G-A | G148I(GCC-GGC)                 | mreC      | b3250       | A  | A  | A   | cell wall structural complex MreBCD transmembrane component MreC                                                                                                                                |
| SNP | 3395576 | G-A | G64G(GCC-TGC)                  | mreB      | b3251       | -  | -  | -   | cell wall structural complex MreBCD, actin-like component MreB                                                                                                                                  |
| SNP | 3396971 | A-G | L59I(TAT-AGG)                  | carD      | b3252       | -  | -  | -   | trypsin-like factor for the utilization of DNA as a carbon source; fibroblast assembly protein homolog                                                                                          |
| SNP | 3398286 | T-G | Y41I(TAT-AGG)                  | yjDH      | b3253       | -  | -  | -   | predicted oxidoreductase, Zn-dependent and NAD(P) <sup>+</sup> binding                                                                                                                          |
| SNP | 3410172 | T-G | N54I(AAC-AGC)                  | achF      | b3266       | -  | -  | -   | multidrug efflux system protein                                                                                                                                                                 |
| SNP | 3413036 | A-G | intergenic (126/164)           | acdA/yjvH | b3266/b3267 | G  | G  | G   | multidrug efflux system protein/predicted outer membrane protein                                                                                                                                |
| SNP | 3424146 | T-G | D77E(GAT-GAG)                  | yjDA      | b3279       | -  | -  | -   | conserved protein                                                                                                                                                                               |
| SNP | 3424518 | G-A | D340I(GAC-AGT)                 | yjBB      | b3280       | A  | A  | A   | conserved protein                                                                                                                                                                               |
| SNP | 3431613 | A-C | Y190I(TAT-TCT)                 | tSA       | b3290       | C  | C  | C   | NAD <sup>+</sup> -binding component of Trk potassium transporter                                                                                                                                |
| SNP | 3439597 | T-G | I105I(ATC-TCT)                 | rpsE      | b3303       | G  | G  | G   | 30S ribosomal subunit protein S6                                                                                                                                                                |
| SNP | 3440574 | A-C | F83V(TTC-TGC)                  | rpfF      | b3305       | -  | -  | -   | 50S ribosomal subunit protein L6                                                                                                                                                                |
| SNP | 3441750 | T-G | K340Q(AAG-ACA)                 | rpfP      | b3313       | -  | -  | -   | 50S ribosomal subunit protein L16                                                                                                                                                               |
| SNP | 3443119 | T-G | E82A(GAA-AGA)                  | rpsC      | b3314       | -  | -  | -   | 30S ribosomal subunit protein S3                                                                                                                                                                |
| SNP | 3445353 | T-C | R182N(AAG-AGG)                 | gspA      | b3323       | C  | C  | C   | general secretory pathway component, cryptic                                                                                                                                                    |
| SNP | 3452854 | T-G | Y82E(GAT-TGC)                  | gspD      | b3325       | -  | -  | -   | general secretory pathway component, cryptic                                                                                                                                                    |
| SNP | 3454848 | T-G | L182R(TTC-TGC)                 | gspK      | b3332       | -  | -  | -   | general secretory pathway component, cryptic                                                                                                                                                    |
| SNP | 3468689 | T-G | intergenic (486/491)           | rpsM      | b3341/b3342 | G  | G  | G   | 30S ribosomal subunit protein S17/30S ribosomal subunit protein S12                                                                                                                             |
| INS | 3471121 | +G  | coding (131/166)               | yjvD/yjgA | b3346/b3347 | +A | +A | +A  | conserved protein/Hsp70-type peptidyl-prolyl-cis-trans isomerase (rotamase)                                                                                                                     |
| SNP | 3474149 | A-C | L380R(TTA-AGA)                 | kefB      | b3350       | -  | -  | -   | potassium/proton antiporter                                                                                                                                                                     |
| SNP | 3477182 | A-G | H495G(GAC-AGG)                 | yjHE      | b3352       | G  | G  | G   | fused predicted transporter-subunits of ABC superfamily: ATP-binding components                                                                                                                 |
| SNP | 3479173 | T-C | Q471I(TTC-TCT)                 | prfB      | b3355       | C  | C  | C   | predicted phosphotransferase                                                                                                                                                                    |
| SNP | 3488333 | T-G | L162I(TAT-TCT)                 | tgaA      | b3364       | -  | -  | -   | predicted transporter                                                                                                                                                                           |
| SNP | 3490228 | T-G | intergenic (131/166)           | nicC      | b3366       | -  | -  | -   | nucleic acid transporter                                                                                                                                                                        |
| SNP | 3491530 | T-C | G285G(GGT-GGC)                 | cydG      | b3368       | -  | -  | -   | fused siroheme synthase L3-dimethylporphyrinogen III dehydrogenase and siroheme ferrochelatase/porphyrinogen methyltransferase                                                                  |
| SNP | 3491929 | A-C | I214I(ATC-TCT)                 | fiaA      | b3370       | -  | -  | -   | predicted fructosyltransferase protein                                                                                                                                                          |
| SNP | 3501214 | A-G | G302I(GAT-TGC)                 | yjHT      | b3377       | -  | -  | -   | predicted inner membrane protein                                                                                                                                                                |
| SNP | 3501443 | T-C | T351(AAC-GCC)                  | yjHW      | b3380       | C  | C  | C   | predicted mutase                                                                                                                                                                                |
| INS | 3508568 | +T  | coding (502/739 nt)            | gph       | b3385       | +T | +T | +T  | phosphoglycolate phosphatase                                                                                                                                                                    |
| SNP | 3509291 | T-G | L150I(TCC-AGC)                 | rpe       | b3386       | -  | -  | -   | D-ribulose 5-phosphate 3-epimerase                                                                                                                                                              |
| SNP | 3511163 | T-G | E275A(GAG-GCC)                 | damX      | b3388       | -  | -  | -   | cell division protein that binds to the septal ring                                                                                                                                             |
| SNP | 3511892 | A-C | intergenic (148/253)           | arxK/hofQ | b3390/b3391 | -  | -  | -   | shikimate kinase (lysozyme required for the utilization of DNA as a carbon source; fibroblast transporter homolog)                                                                              |
| SNP | 3514445 | G-A | L59I(TAT-AGG)                  | carD      | b3394       | -  | -  | -   | trypsin-like factor for the utilization of DNA as a carbon source; fibroblast assembly protein homolog                                                                                          |
| SNP | 3518251 | A-C | Y242I(TAT-AGG)                 | arxK      | b3396       | -  | -  | -   | fused penicillin-binding protein 1a: murein transglycosylase/murein transpeptidase                                                                                                              |
| SNP | 3527886 | A-C | D131A(GAC-TGC)                 | yjFG      | b3399       | C  | C  | C   | GMPT/IMP nucleosidase                                                                                                                                                                           |
| SNP | 3529056 | A-G | K137I(AAC-AGC)                 | hnr       | b4000       | -  | -  | -   | ribosome-associated heat shock protein Hsp15                                                                                                                                                    |
| SNP | 3538927 | A-C | L200V(TTG-GTG)                 | bioH      | b3412       | -  | -  | -   | pimelyl-ACP carboxylesterase                                                                                                                                                                    |
| SNP | 3542440 | T-G | F40I(TTC-TGC)                  | gntI      | b3415       | G  | G  | G   | glucanate transporter, high-affinity GNT I system                                                                                                                                               |
| DEL | 3544567 | del | coding (284/288 nt)            | madA      | b3416       | -  | -  | del | alpha-1,4-glucanase (amyloamylase)                                                                                                                                                              |
| SNP | 3545251 | C-T | A63T(GAA-ACA)                  | malP      | b3417       | T  | T  | T   | maltoedextrin phosphorylase                                                                                                                                                                     |

|     |         |       |                           |            |             |       |       |       |                                                                                                                                          |
|-----|---------|-------|---------------------------|------------|-------------|-------|-------|-------|------------------------------------------------------------------------------------------------------------------------------------------|
| SNP | 3747299 | T→G   | I210(ATC→AGC)             | yjru       | b3585       | -     | G     | G     | predicted DNA binding transcriptional regulator                                                                                          |
| SNP | 3748037 | T→G   | I186(AAC→AAC)             | yjue       | b3586       | -     | G     | G     | membrane fusion protein (MFP) component of efflux pump, signal anchor                                                                    |
| SNP | 3750715 | T→G   | E159(AAG→GCA)             | aldB       | b3588       | G     | G     | G     | aldehyde dehydrogenase 8                                                                                                                 |
| SNP | 3751021 | G→A   | A571(GCG→GTG)             | aldB       | b3588       | A     | A     | A     | aldehyde dehydrogenase 8                                                                                                                 |
| SNP | 3753880 | G→A   | R175(GCC→GCT)             | sea        | b3591       | A     | A     | A     | homocysteine synthase                                                                                                                    |
| SNP | 3756832 | A→G   | intergenic (-198/-30)     | yifB/rhA   | b3592/b3593 | -     | -     | -     | glutathione S-transferase homolog/rhA element core protein RchA                                                                          |
| SNP | 3756939 | G→A   | V261(GTG→GTA)             | rhaA       | b3593       | -     | -     | A     | rha element core protein RhaA                                                                                                            |
| SNP | 3759462 | C→T   | R376(GCC→GCT)             | rhaA       | b3593       | -     | -     | T     | rha element core protein RhaA                                                                                                            |
| SNP | 3761079 | A→C   | K22Q(AAA→CAA)             | yjba       | b3594       | -     | -     | C     | Predicted lysine containing HEAT-repeat                                                                                                  |
| INS | 3761710 | →A    | coding (89/874 nt)        | yjba       | b3594       | →A    | →A    | →A    | predicted lysine containing HEAT-repeat                                                                                                  |
| INS | 3763961 | T→G   | pseudogene (852/868 nt)   | yjba       | b3594       | -     | -     | -     | pseudogene, rhk-link                                                                                                                     |
| DEL | 3787453 | Δ1bp  | intergenic (-224/+51)     | k21/yjbb   | b3617/b3618 | Δ1bp  | Δ1bp  | Δ1bp  | glycine C-acetyltransferase/conserved protein, pfa09612 family                                                                           |
| SNP | 3789372 | T→C   | G236(GGT→GGC)             | rhd        | b3619       | -     | -     | C     | ADP-1-glycero-D-mannohexose-6-epimerase, NAD(P)-binding                                                                                  |
| SNP | 3792857 | T→G   | intergenic (-94/67)       | rfa        | b3622       | G     | G     | G     | O-antigen ligase                                                                                                                         |
| DEL | 3794503 | Δ1bp  | coding (372/852 nt)       | rfaZ       | b3624       | Δ1bp  | Δ1bp  | Δ1bp  | lipopolysaccharide core biosynthesis protein                                                                                             |
| DEL | 3794939 | Δ1bp  | intergenic (-65/+6)       | rfaZ/rfaY  | b3624/b3625 | Δ1bp  | Δ1bp  | Δ1bp  | lipopolysaccharide core biosynthesis protein/lipopolysaccharide core biosynthesis protein                                                |
| SNP | 3797435 | G→A   | F101(TCT→CTT)             | rfa        | b3627       | A     | A     | A     | UDP-D-galactose-4-epimerase/lipopolysaccharide-alpha-1,3-D-galactosyltransferase                                                         |
| SNP | 3803400 | T→G   | T61(TAT→ACG)              | waaA       | b3633       | -     | -     | G     | 3-deoxy-D-manno-oxalulosonic acid transferase (KDO transferase)                                                                          |
| SNP | 3803439 | T→C   | Y108(TAT→CAT)             | waaA       | b3633       | -     | -     | G     | 3-deoxy-D-manno-oxalulosonic acid transferase (KDO transferase)                                                                          |
| SNP | 3804104 | T→C   | Y06(AATC→AGCC)            | waaB       | b3633       | C     | C     | C     | 3-deoxy-D-manno-oxalulosonic acid transferase (KDO transferase)                                                                          |
| SNP | 3806416 | T→G   | intergenic (-64/+153)     | rpmB/yjrc  | b3637/b3638 | G     | G     | G     | 50S ribosomal subunit protein L28/conserved protein, LUF0758 family, rna30c                                                              |
| SNP | 3808793 | T→G   | S62A(TAC→GCA)             | trmH       | b3651       | -     | -     | C     | rRNA mG18-2'-O-methyltransferase, SAM-dependent                                                                                          |
| SNP | 3818671 | A→C   | E160(AAG→GCA)             | yjch       | b3651       | -     | -     | G     | conserved protein                                                                                                                        |
| SNP | 3828249 | T→G   | M327(ATG→AAG)             | yjch       | b3655       | -     | -     | G     | conserved protein                                                                                                                        |
| SNP | 3829206 | A→G   | G234(GGT→GGC)             | yjcl       | b3657       | -     | -     | C     | predicted transporter                                                                                                                    |
| SNP | 3833075 | T→G   | I50(MAT→ATC)              | yjcl       | b3660       | G     | G     | G     | predicted inner membrane protein                                                                                                         |
| INS | 3834115 | →C    | coding (557/819 nt)       | rjpa       | b3661       | →C    | →C    | →C    | cytoplasmic membrane lipoprotein-28                                                                                                      |
| SNP | 3838311 | T→C   | T113(AAC→AGC)             | yjef       | b3664       | -     | -     | C     | Probable adenine permease                                                                                                                |
| SNP | 3847072 | A→C   | S31A(TCT→GCT)             | lrvB       | b3671       | -     | -     | C     | acetylacetyl synthase I, large subunit                                                                                                   |
| SNP | 3854112 | T→G   | H228(TAC→ACC)             | yjik       | b3679       | -     | -     | G     | predicted transporter                                                                                                                    |
| SNP | 3854704 | A→C   | S31A(TCT→GCT)             | yjik       | b3679       | -     | -     | C     | predicted transporter                                                                                                                    |
| DEL | 3861805 | Δ12bp | coding (282-296/414 nt)   | lbpA       | b3687       | Δ12bp | Δ12bp | Δ12bp | heat shock chaperone                                                                                                                     |
| SNP | 3865044 | A→C   | R330(GAG→GAC)             | chrA       | b3900       | C     | C     | C     | predicted oxidoreductase with FAD/NAD(P)+ binding domain                                                                                 |
| SNP | 3866323 | T→C   | E128(AAG→AGC)             | dgpD       | b4478       | -     | -     | C     | galactonate dehydrogenase                                                                                                                |
| SNP | 3873372 | A→C   | C476(GTG→GGT)             | gyrB       | b3699       | -     | -     | C     | DNA gyrase, subunit B                                                                                                                    |
| SNP | 3880070 | T→G   | F106(TTT→TGT)             | yjdc       | b3705       | G     | G     | G     | membrane protein insertase                                                                                                               |
| SNP | 3880828 | T→C   | S124(TCC→GCT)             | yjef       | b3712       | G     | G     | G     | predicted phosphoenolpyruvate transferase, COG2091 family                                                                                |
| SNP | 3882220 | T→C   | I54(VATC→GTC)             | bgjB       | b3721       | -     | -     | C     | cryptic phospho-beta-glucosidase 8                                                                                                       |
| SNP | 3890979 | A→C   | A189(ATC→AGC)             | bgjF       | b3722       | -     | -     | C     | fused beta-glucuronidase-specific P15 enzyme, IIA component/IIB component/II component                                                   |
| SNP | 3900760 | T→G   | K324(AAG→GAG)             | bgjG       | b3723       | G     | G     | G     | transcriptional antiterminal of the bgj operon                                                                                           |
| DEL | 3901102 | Δ1bp  | coding (144/837 nt)       | bgjG       | b3723       | Δ1bp  | Δ1bp  | Δ1bp  | transcriptional antiterminal of the bgj operon                                                                                           |
| SNP | 3905177 | T→G   | K342(AAG→GAG)             | p05        | b3728       | G     | G     | G     | periplasmic phosphatase binding protein, high-affinity                                                                                   |
| SNP | 3917319 | G→A   | E058(GCC→GCT)             | atpD       | b3733       | -     | -     | G     | F1 sector of membrane-bound ATP synthase, gamma subunit                                                                                  |
| SNP | 3918403 | T→G   | K175(AAA→CAA)             | atpA       | b3734       | -     | -     | G     | F1 sector of membrane-bound ATP synthase, alpha subunit                                                                                  |
| SNP | 3919594 | A→C   | G86(AAG→AGG)              | atpE       | b3737       | C     | C     | C     | F0 sector of membrane-bound ATP synthase, subunit c                                                                                      |
| SNP | 3917799 | T→G   | K175(AAA→CAA)             | atpE       | b3737       | -     | -     | C     | F0 sector of membrane-bound ATP synthase, subunit c                                                                                      |
| SNP | 3918820 | G→A   | H489(TAC→ATC)             | mmgM       | b3741       | A     | A     | A     | 5-methylmethyl-2-thiouridine modification of tRNA L34                                                                                    |
| SNP | 3921391 | A→C   | E128(AAG→AGC)             | vacJ       | b3745       | -     | -     | G     | predicted vacA toxin factor containing protein                                                                                           |
| SNP | 3924359 | T→G   | A122(AAG→AGC)             | kup        | b3747       | -     | -     | G     | potassium transporter                                                                                                                    |
| SNP | 3929269 | T→G   | S272(TAT→GCT)             | rbaA       | b3749       | G     | G     | G     | fused D-ribose transporter subunits of ABC superfamily-ATP-binding domains                                                               |
| SNP | 3932002 | C→T   | intergenic (-121/12)      | rbaM/rbaR  | b3750/b3753 | -     | -     | G     | rhamnulose/DNA-binding transcriptional repressor of ribose metabolism                                                                    |
| SNP | 3943677 | T→G   | H324(TAT→GCT)             | yjfb       | b3765       | -     | -     | G     | predicted bifunctional enzyme and transcriptional regulator                                                                              |
| SNP | 3974622 | T→G   | I288(ATT→ATG)             | yjfk       | b3795       | -     | -     | G     | predicted transporter                                                                                                                    |
| INS | 3975574 | →C    | coding (17/67 nt)         | hcrT       | b3798       | →C    | →C    | →C    | HcrA-toxin                                                                                                                               |
| SNP | 3978282 | A→C   | K216(AG→AGC)              | asfB       | b3800       | C     | C     | C     | predicted regulator of arylsulfatase activity                                                                                            |
| SNP | 3987462 | A→G   | E378(AAG→GAG)             | cyaA       | b3806       | G     | G     | G     | adenylate cyclase                                                                                                                        |
| SNP | 3988852 | A→C   | E115(GTT→GAT)             | hcrG/yjrc  | b3807/b4558 | -     | -     | C     | iron-dependent inhibitor of iron-sulfur cluster formation; frataxin; iron-binding and oxidizing protein/predicted lipoprotein            |
| SNP | 3994657 | A→G   | N665(AAC→AGC)             | uvrD       | b3813       | G     | G     | G     | DNA-dependent ATPase I and helicase II                                                                                                   |
| SNP | 4013819 | A→G   | N185(AAG→GCA)             | tafB       | b3838       | -     | -     | G     | TafA/B-C protein translocation system subunit                                                                                            |
| SNP | 4015933 | A→C   | K195(TTA→TGA)             | tafA       | b3845       | -     | -     | G     | TafA/B-C protein translocation system subunit                                                                                            |
| SNP | 4020661 | A→C   | Y539(TAT→TAG)             | fabB       | b3846       | C     | C     | C     | fused 3-hydroxybutyryl CoA epimerase/delta(3)-cis-delta(2)-trans-enoil-CoA isomerase/enoil-CoA hydratase/3-hydroxyacyl-CoA dehydrogenase |
| SNP | 4020798 | A→C   | C494(GTC→GGC)             | fabB       | b3846       | -     | -     | C     | fused 3-hydroxybutyryl CoA epimerase/delta(3)-cis-delta(2)-trans-enoil-CoA isomerase/enoil-CoA hydratase/3-hydroxyacyl-CoA dehydrogenase |
| SNP | 4023388 | A→C   | E128(AAG→AGC)             | fabB       | b3846       | -     | -     | C     | predicted ven-Wilbraux-like factor containing protein                                                                                    |
| SNP | 4032075 | T→G   | intergenic (-113/+137)    | rfaM/rnbB  | b3855/b3856 | -     | -     | G     | 5S ribosomal RNA of rna operon/molybdopterin-guanine dinucleotide biosynthesis protein B                                                 |
| SNP | 4032078 | C→G   | intergenic (-136/+134)    | rfaM/rnbB  | b3855/b3856 | -     | -     | G     | 5S ribosomal RNA of rna operon/molybdopterin-guanine dinucleotide biosynthesis protein B                                                 |
| SNP | 4034985 | A→C   | G239(AAG→AGC)             | rfaA       | b3859       | A     | A     | A     | The/For kinase implicated in Gcp stress response                                                                                         |
| SNP | 4047175 | T→G   | K157(AAA→AAC)             | glnL       | b3869       | G     | G     | G     | sensory histidine kinase in two-component regulatory system with GlnG                                                                    |
| SNP | 4049160 | T→G   | H11(ATT→CTT)              | glnA       | b3870       | -     | -     | G     | glutamine synthetase                                                                                                                     |
| SNP | 4052764 | T→C   | K134(AAG→AGC)             | yjfp       | b3877       | -     | -     | G     | alpha-glucosidase                                                                                                                        |
| SNP | 4060515 | T→G   | H23P(TAT→CCT)             | yjhg       | b3878       | -     | -     | G     | alpha-glucosidase                                                                                                                        |
| SNP | 4064861 | A→C   | H62(TTT→TGT)              | yjhu       | b3882       | -     | -     | C     | gamma-hydroxyglutarate dehydrogenase, NADH-dependent                                                                                     |
| SNP | 4067129 | A→G   | E076(GCC→GCT)             | yjix       | b3885       | -     | -     | G     | ADP-D-glucose-1-P phosphatase, gamma subunit                                                                                             |
| SNP | 4077011 | T→G   | K100(AAG→GAG)             | fdsG       | b3894       | G     | G     | G     | formate dehydrogenase-O, large subunit                                                                                                   |
| SNP | 4077797 | A→C   | E128(AAG→AGC)             | fdsH       | b3895       | -     | -     | G     | formate dehydrogenase-O, large subunit                                                                                                   |
| SNP | 4079297 | A→C   | E130(GAA→GAC)             | yjig       | b3896       | C     | C     | C     | conserved lipoprotein                                                                                                                    |
| SNP | 4089027 | C→T   | intergenic (-27/15)       | rhaB/rhaS  | b3904/b3905 | T     | T     | T     | rhamnulose/DNA-binding transcriptional activator for rhaBAD and rhaT, r-hamnose binding                                                  |
| SNP | 4092214 | A→C   | E155(ATC→GCT)             | katG/yjhm  | b3909/b3910 | G     | G     | G     | 2-oxo-3-deoxy-glucuronate transporter/6-hydroxymethylamine resistance protein                                                            |
| SNP | 4094417 | A→C   | N97(TAT→GCT)              | yjlm       | b3910       | -     | -     | G     | 6-N-hydroxymethylamine resistance protein                                                                                                |
| SNP | 4098999 | A→G   | T109(AAC→GCA)             | fler       | b3915       | G     | G     | G     | ferrous iron and zinc transporter                                                                                                        |
| SNP | 4099314 | C→T   | E155(ATC→GCT)             | yjla       | b3916       | T     | T     | T     | 6-phosphofructokinase                                                                                                                    |
| SNP | 4100334 | T→G   | G65(GGT→GGG)              | slp        | b3917       | G     | G     | G     | sulfate transporter subunit                                                                                                              |
| SNP | 4101001 | A→C   | K288(AAG→GCA)             | yjrb       | b3917       | -     | -     | C     | sulfate transporter subunit                                                                                                              |
| SNP | 4101822 | A→C   | L186(ATC→AGC)             | cdh        | b3918       | -     | -     | G     | CDH-diacylglycerol phosphatidylhydrolase                                                                                                 |
| SNP | 4105206 | A→G   | S191(AGT→AGC)             | hru        | b3924       | G     | G     | G     | ferredoxin-NADP reductase                                                                                                                |
| SNP | 4111928 | T→G   | I176(TAT→CTC)             | flrJ       | b3931       | -     | -     | G     | molecular chaperone and ATPase component of HslU protease                                                                                |
| SNP | 4115160 | A→C   | T145(GTA→GGG)             | yjif       | b3937       | -     | -     | G     | conserved protein, DUF839 family                                                                                                         |
| SNP | 4122884 | A→C   | G858(CAG→CCG)             | metL       | b3940       | C     | C     | C     | fused aspartyltransferase II, homoserine dehydrogenase II                                                                                |
| SNP | 4126417 | A→C   | E426(AAG→GCA)             | katG       | b3942       | C     | C     | C     | catalase-peroxidase III, heme b containing                                                                                               |
| SNP | 4127051 | A→C   | Y513(TTA→TGA)             | katG       | b3942       | -     | -     | C     | catalase-peroxidase III, heme b containing                                                                                               |
| SNP | 4133096 | A→G   | G144(GGT→GGC)             | ptaA       | b3947       | -     | -     | G     | fused predicted P15 enzymes: Hpr component/enzyme I component/enzyme IIA component                                                       |
| SNP | 4133584 | C→T   | T87(AAG→AGC)              | ptaA       | b3947       | T     | T     | T     | fused predicted P15 enzymes: Hpr component/enzyme I component/enzyme IIA component                                                       |
| SNP | 4142096 | A→C   | E170(GTC→GGC)             | ppc        | b3956       | G     | G     | G     | phosphoenolpyruvate carboxylase                                                                                                          |
| SNP | 4144876 | G→A   | intergenic (-472/+126)    | ppc/argE   | b3956/b3957 | -     | -     | A     | phosphoenolpyruvate carboxylase/acetylthiolase decarboxylase                                                                             |
| SNP | 4151277 | T→G   | N274(AAT→CAT)             | strA       | b3962       | -     | -     | G     | pyridine nucleotide transhydrogenase, soluble                                                                                            |
| SNP | 4170146 | A→G   | E133(ATC→GCT)             | rpk        | b3983       | -     | -     | G     | 50S ribosomal subunit protein L11                                                                                                        |
| SNP | 4174834 | A→C   | N762(AAG→CAC)             | rpoB       | b3987       | -     | -     | C     | RNA polymerase, beta subunit                                                                                                             |
| SNP | 4181776 | C→T   | E58(AAG→AAG)              | thgE       | b3991       | -     | -     | T     | thiamin biosynthesis ThgM complex subunit                                                                                                |
| SNP | 4184302 | A→C   | E194(GTC→GGC)             | thfF       | b3992       | C     | C     | C     | adenylate transferase, modifies ThS C-terminus                                                                                           |
| SNP | 4187235 | G→A   | G576(GCC→GGT)             | thc        | b3994       | A     | A     | A     | thiamin (pyrimidine moiety) biosynthesis protein                                                                                         |
| SNP | 4189591 | A→C   | T180(TAT→ATC)             | hcrE       | b3997       | -     | -     | G     | uroporphyrinogen decarboxylase                                                                                                           |
| INS | 4191485 | →C    | intergenic (-155/-132)    | hcrE/yjhpA | b3999/b4000 | →C    | →C    | →C    | conserved protein/HLA-DNA-binding transcriptional regulator, alpha subunit                                                               |
| SNP | 4191334 | A→C   | I85(LAT→CTT)              | zraS       | b4003       | G     | G     | G     | senary histidine kinase in two-component regulatory system with ZraR                                                                     |
| SNP | 4208719 | C→T   | E128(AAG→AGC)             | aceA       | b4015       | -     | -     | C     | isocitrate lyase                                                                                                                         |
| SNP | 4208793 | A→G   | T127(AAC→AGC)             | aceA       | b4015       | G     | G     | G     | isocitrate lyase                                                                                                                         |
| SNP | 4211725 | G→A   | H23H(CAT→CAT)             | arpA       | b4017       | A     | A     | A     | ankyrin repeat protein                                                                                                                   |
| SNP | 4212197 | A→G   | E128(AAG→AGC)             | hcr        | b4018       | -     | -     | G     | DNA-binding transcriptional repressor                                                                                                    |
| SNP | 4217666 | A→C   | K823Q(AAA→CAA)            | metM       | b4019       | -     | -     | G     | homocysteine-N5-methyltetrahydrofolate transmethyase, B12-dependent                                                                      |
| SNP | 4231360 | A→G   | G676(GGT→GGC)             | yjie       | b4021       | G     | G     | G     | D-xylulose transporter                                                                                                                   |
| SNP | 4231747 | A→C   | intergenic (-221/343)     | metM/flaMk | b4020/b4035 | -     | -     | G     | maltose transporter subunit/fused maltose transport subunit, ATP-binding component of ABC superfamily/regulatory protein                 |
| SNP | 4241410 | A→C   | pseudogene (1402/1581 nt) | yjbl       | b4028       | C     | C     | C     | pseudogene, pentapeptide repeat-related                                                                                                  |
| SNP | 4243819 | A→G   | H81C(CAT→GCT)             | ubcC       | b4039       | G     | G     | G     | chorismate-pyruvate lyase                                                                                                                |
| SNP | 4248144 | A→C   | I81(LAT→CTT)              | qjgA       | b4042       | -     | -     | G     | diacylglycerol kinase                                                                                                                    |
| SNP | 4251758 | A→C   | H41(AAT→ATC)              | yjbl       | b4047       | C     | C     | C     | predicted protein                                                                                                                        |
| SNP | 4252062 | G→A   | V151(GTT→ATT)             | dxaA       | b4049       | A     | A     | A     | rRNA-dihydrouridine synthase A                                                                                                           |
| SNP | 4264967 | A→C   | intergenic (-189/253)     | yjif/yjgA  | b4101/b4055 | -     | -     | G     | hypothetical protein/acid phosphatase/phosphotransferase, class B, non-specific                                                          |
| SNP | 4264513 | T→G   | E222(AAG→GAG)             | uvrA       | b4058       | -     | -     | G     | ATPase and DNA damage recognition protein of nucleotide excision repair endonuclease UvrABC                                              |
| SNP | 4265066 | A→C   | S38A(TC→GCT)              | uvrA       | b4058       | -     | -     | G     | ATPase and DNA damage recognition protein of nucleotide excision repair endonuclease UvrABC                                              |
| SNP | 4269860 | T→C   | G132(GCC→GCT)             | yjef       | b4071       | -     | -     | C     | nucleotide reductase, formate-dependent, penta-heme cytochrome c                                                                         |
| SNP | 4284426 | A→C   | I520(ATG→CTT)             | nrfE       | b4074       | -     | -     | C     | heme lyase (NrfE/G) for insertion of heme into C52, subunit NrfE                                                                         |
| SNP | 4284605 | T→G   | Y870(TAC→GAC)             | gfp        | b4077       | -     | -     | C     | glutamate/aspartate proton symporter                                                                                                     |
| INS | 4287186 | →C    | intergenic (-1686/+56)    | gfp/yjFD   | b4077/b4078 | -     | -     | C     | glutamate/aspartate proton symporter/conserved protein                                                                                   |
| SNP | 4288716 | T→C   | T633(AAC→AGC)             | fdhF       | b4079       | C     | C     | C     | formate dehydrogenase-H, selenium-dependent subunit                                                                                      |
| SNP | 4299378 | A→C   | F145(TCC→TCC)             | metN       | b4082       | -     | -     | C     | membrane fusion protein of efflux pump                                                                                                   |
| SNP | 4299800 | T→C   | T392(AAG→GAG)             | atpC       | b4086       | -     | -     | G     | carbon subunit                                                                                                                           |
| SNP | 4309087 | G→A   | L39F(TTC→TTC)             | phnL       | b4096       | A     | A     | A     | carbon phosphorus lyase complex subunit                                                                                                  |
| SNP | 4309541 | A→C   | E127(AAG→AGC)             | phnB       | b4097       | G     | G     | G     | carbon phosphorus lyase complex subunit                                                                                                  |
| SNP | 4311361 | C→T   | W156(TGG→TGA)             | yjfn       | b4102       | -     | -     | T     | predicted DNA-binding transcriptional regulator of phosphonate uptake and biodegradation                                                 |
| SNP | 4316707 | A→C   | M114(AAG→AGG)             | phnF       | b4107       | C     | C     | C     | conserved protein                                                                                                                        |
| SNP | 4320551 | A→G   | I687(TAT→ATC)             | yjfm       | b4109       | G     | G     | G     | multisubunit suppressor of yjhl motility mutation, function unknown; related to Dynamis GTPase                                           |
| SNP | 4323286 | A→C   | D537E(TG→GAG)             | epiA       | b4114       | -     | -     | C     | predicted metal dependent hydrolase                                                                                                      |
| SNP | 4326479 | A→C   | C140(GTC→GGC)             | epiA       | b4114       | -     | -     | C     | predicted metal dependent hydrolase                                                                                                      |

|     |         |     |                           |           |             |    |    |    |                                                                                                                                                   |
|-----|---------|-----|---------------------------|-----------|-------------|----|----|----|---------------------------------------------------------------------------------------------------------------------------------------------------|
| SNP | 4460510 | A→G | YS27(CAC→TGC)             | mgfA      | b4242       | G  | G  | G  | magnesium transporter                                                                                                                             |
| SNP | 4460506 | T→C | S395(ACT→AGC)             | ygiJ      | b4251       | -  | -  | C  | predicted transcriptional regulator                                                                                                               |
| SNP | 4461380 | A→C | NSH(AAT→CAT)              | tabA      | b4252       | -  | -  | C  | biofilm modulator regulated by toxins                                                                                                             |
| SNP | 4466471 | T→G | F102(TTT→GTT)             | tabA      | b4252       | G  | G  | G  | biofilm modulator regulated by toxins                                                                                                             |
| SNP | 4466522 | C→T | intergenic (+12/-111)     | tabA/ygiJ | b4252/b4253 | T  | T  | T  | biofilm modulator regulated by toxins/predicted protein                                                                                           |
| SNP | 4467331 | A→C | K197(QAAA→CAA)            | ygiJ      | b4253       | C  | C  | C  | predicted protein                                                                                                                                 |
| SNP | 4468167 | T→G | F475(TTT→TTG)             | ygiJ      | b4253       | G  | G  | G  | predicted protein                                                                                                                                 |
| SNP | 4470236 | C→T | G110(GGG→GAG)             | ygiM      | b4256       | T  | T  | T  | predicted acetyltransferase                                                                                                                       |
| INS | 4471270 | +T  | pseudogene (262/1223 nt)  | ygiN      | b4257       | +T | +T | +T | inner membrane protein, DUF898 family                                                                                                             |
| SNP | 4472728 | A→G | V472A(GTT→GCT)            | vais      | b4258       | G  | G  | G  | valyl-tRNA synthetase                                                                                                                             |
| SNP | 4473369 | A→G | R338(GCT→GGC)             | vais      | b4258       | G  | G  | G  | valyl-tRNA synthetase                                                                                                                             |
| SNP | 4475570 | A→G | F64(TTC→CTC)              | hoiC      | b4259       | G  | G  | G  | DNA polymerase III, chi subunit                                                                                                                   |
| SNP | 4476334 | T→G | Y280(TAT→GAT)             | lptF      | b4261       | G  | G  | G  | lipopolysaccharide export ABC permease of the LptBFG export complex                                                                               |
| SNP | 4481872 | C→T | E154(GAA→AAA)             | ygiB      | b4269       | T  | T  | T  | predicted alcohol dehydrogenase, Zn-dependent and NAD(P) <sup>+</sup> binding                                                                     |
| SNP | 4489280 | A→C | intergenic (+135/-297)    | intB/nsiC | b4271/b4272 | C  | C  | C  | pseudogene, integrase homology/S, phage, Tr; Phage-related functions and prophages; KpLE2 phage-like element; P4-like integrase/52 repressor TnpA |
| SNP | 4489560 | T→C | intergenic (+135/-17)     | intB/nsiC | b4271/b4272 | -  | -  | -  | pseudogene, integrase homology/S, phage, Tr; Phage-related functions and prophages; KpLE2 phage-like element; P4-like integrase/52 repressor TnpA |
| SNP | 4492542 | A→C | R365(GAG→GAGC)            | ygiF      | b4277       | -  | -  | C  | KpLE2 phage-like element; predicted protein                                                                                                       |
| SNP | 4494004 | T→G | K245(QAAA→CAA)            | insG      | b4278       | G  | G  | G  | IS4 transposase                                                                                                                                   |
| SNP | 4500526 | T→C | pseudogene (2022/2597 nt) | insD      | b4283       | -  | -  | C  | pseudogene, IS911 transposase B/S, phage, Tr; Transposon-related functions; extrachromosomal; transposon related                                  |
| SNP | 4500447 | A→G | V334(GTG→GGG)             | FecA      | b4291       | G  | G  | G  | KpLE2 phage-like element; ferric citrate outer membrane transporter                                                                               |
| SNP | 4509156 | A→G | F129(LTT→ACT)             | fectI     | b4293       | -  | -  | G  | KpLE2 phage-like element; RNA polymerase, sigma 19 factor                                                                                         |
| SNP | 4511257 | A→C | N23K(IAT→AAG)             | yjiF      | b4296       | C  | C  | C  | KpLE2 phage-like element; predicted transporter                                                                                                   |
| SNP | 4524212 | T→G | NS91(AAC→CAC)             | yjiP      | b4306       | -  | -  | G  | KpLE2 phage-like element; predicted methyltransferase                                                                                             |
| SNP | 4525478 | A→G | intergenic (+120/-373)    | yjiV/yjiZ | b4566/b4657 | -  | -  | G  | conserved protein/pseudogene, rimK paralog, C-terminal fragment                                                                                   |
| SNP | 4531018 | A→C | intergenic (+122/-1244)   | nanC/rimB | b4511/b4512 | -  | -  | C  | N-acetylneuraminic acid outer membrane channel protein/tyrosine recombinase/inversion of on/off regulator of fimA                                 |
| SNP | 4541752 | G→A | C271(TTC→TAC)             | uxuA      | b4322       | A  | A  | A  | mannonate hydrolase                                                                                                                               |
| INS | 4548065 | +T  | intergenic (+440/-232)    | yjiC/irad | b4325/b4326 | +T | +T | +T | predicted protein/RpoS stabilizer after DNA damage, anti-RsaB factor                                                                              |
| SNP | 4555513 | T→G | T149(GCA→CCA)             | yjiL      | b4334       | G  | G  | G  | predicted ATPase, activator of (R)-hydroxyglutaryl-CoA dehydratase                                                                                |
| SNP | 4568662 | A→C | Y211(TAT→GAT)             | mcrC      | b4345       | -  | -  | C  | 5-methylcytosine-specific restriction enzyme McrBC, subunit McrC                                                                                  |
| SNP | 4569079 | A→C | Y720(TAC→GAC)             | mcrC      | b4345       | -  | -  | C  | 5-methylcytosine-specific restriction enzyme McrBC, subunit McrC                                                                                  |
| SNP | 4572549 | A→C | Y402(TAT→GAT)             | hds       | b4348       | -  | -  | C  | specificity determinant for hsdM and hsdR                                                                                                         |
| SNP | 4573472 | T→C | Q249(CAG→CGG)             | hdsM      | b4349       | C  | C  | C  | DNA methyltransferase M                                                                                                                           |
| SNP | 4573999 | A→G | V356A(GTG→GGC)            | hdsR      | b4350       | G  | G  | G  | endonuclease R Type I restriction enzyme                                                                                                          |
| SNP | 4578383 | G→A | G210(GGG→AGG)             | mrr       | b4351       | A  | A  | A  | methylated adenine and cytosine restriction protein                                                                                               |
| SNP | 4582270 | A→G | V105A(GTG→GGC)            | yjiY      | b4354       | G  | G  | G  | predicted inner membrane protein                                                                                                                  |
| SNP | 4588884 | T→G | N474H(AAC→CAC)            | oppB      | b4359       | -  | -  | G  | phosphoglycerol transferases I and II                                                                                                             |
| INS | 4597390 | +G  | noncoding (80/87 nt)      | leuV      | b4368       | +G | +G | +G | tRNA-Leu                                                                                                                                          |
| INS | 4597511 | +G  | noncoding (80/87 nt)      | leuP      | b4369       | +G | +G | +G | tRNA-Leu                                                                                                                                          |
| SNP | 4602463 | T→G | intergenic (+154/-239)    | prfC/omvY | b4376/b4376 | -  | -  | C  | peptide chain release factor RF-3/periplasmic protein                                                                                             |
| SNP | 4602309 | A→C | K194(QAAA→CAA)            | omvY      | b4376       | -  | -  | C  | periplasmic protein                                                                                                                               |
| SNP | 4605501 | A→G | E171E(GAA→GAG)            | yjiV      | b4378       | G  | G  | G  | predicted Dnaase                                                                                                                                  |
| SNP | 4606045 | A→G | L208S(TTG→TGG)            | yjiW      | b4379       | G  | G  | G  | predicted pyruvate formate lyase activating enzyme                                                                                                |
| SNP | 4606057 | A→C | 854(EAT→AGT)              | yjiW      | b4379       | -  | -  | C  | predicted pyruvate formate lyase activating enzyme                                                                                                |
| SNP | 4606903 | G→A | G489(GGC→GGT)             | yjiI      | b4380       | A  | A  | A  | conserved protein                                                                                                                                 |
| SNP | 4608045 | A→C | S70(GAG→GGC)              | deoC      | b4381       | -  | -  | C  | 2-deoxyribose 5-phosphate aldolase, NAD(P) <sup>+</sup> linked                                                                                    |
| SNP | 4609744 | A→C | D28A(GAG→GGC)             | deoA      | b4382       | C  | C  | C  | thymidine phosphorylase                                                                                                                           |
| SNP | 4611163 | A→C | Y86S(TAC→TCC)             | deoB      | b4383       | -  | -  | C  | phosphopentomutase                                                                                                                                |
| SNP | 4611935 | C→T | I343(ATC→ATT)             | deoB      | b4383       | T  | T  | T  | phosphopentomutase                                                                                                                                |
| SNP | 4624699 | A→C | G117G(GGT→GGG)            | yjiX      | b4394       | -  | -  | C  | inosine/kanthosine triphosphatase                                                                                                                 |
| SNP | 4629068 | A→G | T357A(ACC→GCC)            | creC      | b4399       | G  | G  | G  | sensory histidine kinase in two-component regulatory system with CreB or PhoB, regulator of the CreBC regulon                                     |
| SNP | 4632851 | A→G | G202(QCA→CAG)             | yjiD      | b4403       | G  | G  | G  | predicted tRNA methyltransferase                                                                                                                  |
