# Supplementary material for: Chance and necessity in the genome evolution of endosymbiotic bacteria of insects
Source: PubMed Central journal article supplement (PMC5437351; doi:10.1038/ismej.2017.18), 2017-03-21
Supplement: ismej201718x4.pdf [file ismej201718x4.pdf]

**Table S4. Mutational spectrum of experimentally evolving clonal bacteria.**

| Line | Coding Regions     |                    |                 |                | Non-coding regions |                 |                |
|------|--------------------|--------------------|-----------------|----------------|--------------------|-----------------|----------------|
|      | NSNPs <sup>a</sup> | SSNPs <sup>b</sup> | Insertions (bp) | Deletions (bp) | SNPs               | Insertions (bp) | Deletions (bp) |
| A    | 339                | 180                | 52 (62)         | 26 (38340)     | 70                 | 31 (35)         | 15 (15)        |
| B    | 752                | 228                | 33 (36)         | 46 (3085)      | 139                | 23 (24)         | 16 (21)        |

<sup>a</sup>Non-Synonymous Single Nucleotide Polymorphisms

<sup>b</sup>Synonymous Single Nucleotide Polymorphisms
