# Supplementary material for: Chance and necessity in the genome evolution of endosymbiotic bacteria of insects
Source: PubMed Central journal article supplement (PMC5437351; doi:10.1038/ismej.2017.18), 2017-03-21
Supplement: ismej201718x5.pdf [file ismej201718x5.pdf]

**Table S5. GO categories corresponding to Molecular Function enriched for mutated Line B of the evolution experiment of Escherichia coli.**

| <b>GO Term</b>         | <b># genes</b> | <b>#Observed</b> | <b>#Expected</b> | <b>Fold Enrichment</b> |
|------------------------|----------------|------------------|------------------|------------------------|
| Receptor Activity      | 50             | 22               | 7.57             | 2.91                   |
| Anion Binding          | 687            | 145              | 104.02           | 1.39                   |
| Small Molecule Binding | 740            | 153              | 112.04           | 1.37                   |
| Catalytic Activity     | 2005           | 373              | 303              | 1.23                   |

**genes in**

| <b>P-value</b> |
|----------------|
| 1.04E-02       |
| 2.47E-02       |
| 2.16E-02       |
| 2.24E-05       |
