# Supplementary material for: Chance and necessity in the genome evolution of endosymbiotic bacteria of insects
Source: PubMed Central journal article supplement (PMC5437351; doi:10.1038/ismej.2017.18), 2017-03-21
Supplement: ismej201718x6.pdf [file ismej201718x6.pdf]

3,900,309 Δ1 bp  
 3,960,228 Δ1 bp  
 4,003,806 +A  
 4,004,074 A→G  
 4,037,965 A→G  
 4,094,124 A→G  
 4,113,515 C→T  
 4,124,006 Δ1 bp  
 4,156,496 C→T  
 4,175,120 T→C  
 4,188,448 A→G  
 4,190,927 A→G  
 4,225,439 Δ1 bp  
 4,294,406 Δ1 bp  
 4,297,686 +CG  
 4,303,503 Δ1 bp  
 4,313,141 G→A  
 4,330,536 T→C  
 4,381,847 T→C  
 4,401,351 Δ1 bp  
 4,402,611 T→C  
 4,447,338 Δ1 bp  
 4,453,646 C→G  
 4,453,651 C→G  
 4,457,492 C→T  
 4,457,497 G→A  
 4,457,498 G→A  
 4,464,733 G→A  
 4,471,270 +T  
 4,471,954 G→A  
 4,479,877 +C  
 4,500,691 G→A  
 4,548,065 +T  
 4,594,767 G→C  
 4,597,511 +G  
 4,597,626 +G  
 4,605,748 A→G  
 4,605,807 T→C  
 4,631,366 C→T

3.40% intergenic (-34/+100)  
 13.50% coding (81/1266 nt)  
 3.10% intergenic (-69/-42)  
 4.10% D76G (GAC→GCG)  
 100% intergenic (-57/-307)  
 100% intergenic (+145/-4)  
 2.10% intergenic (-3/+171)  
 2.70% coding (85/891 nt)  
 18.10% R518C (CGT→TGT)  
 11.80% V857A (GTG→GCG)  
 2.30% Q80Q (CAA→CAG)  
 5.60% T40A (ACC→GCC)  
 2.10% coding (376/1650 nt)  
 3.60% coding (1538/1608 nt)  
 100% intergenic (+586/+56)  
 22.40% coding (795/891 nt)  
 6.60% C196C (TGC→TGT)  
 4.20% N431S (AAC→AGC)  
 3.50% E274E (GAA→GAG)  
 10.50% intergenic (+39/-88)  
 4.80% S2P (TCT→GCT)  
 4.50% coding (248/1374 nt)  
 2.20% E107D (GAG→GAC)  
 2.50% V106L (GTC→CTC)  
 15.40% intergenic (-6/+113)  
 26.80% intergenic (-11/+108)  
 7.70% intergenic (-12/+107)  
 2.20% V209V (GTC→GTT)  
 100% pseudogene (262/291 nt)  
 6.60% pseudogene (550/927 nt)  
 5.20% coding (1492/1503 nt)  
 100% pseudogene (378/543 nt)  
 96.80% intergenic (-440/-232)  
 2.20% intergenic (-605/-14)  
 4.60% noncoding (80/87 nt)  
 6.40% noncoding (80/87 nt)  
 19.70% intergenic (+184/+236)  
 20.60% intergenic (+243/+177)  
 10.60% G62D (GGC→GAC)

*bglF* ← / fused beta-glucoside-specific PTS enzymes: IIA component/IIB component/IIC component/transcriptional antiterminator of the *bgl* operon  
*rhlB* ← ATP-dependent RNA helicase  
*rhlB* ← homoserine, homoserine lactone and S-methyl- methionine efflux pump/lysophospholipase L2  
*plbB* → lysophospholipase L2  
*yjiG* → inner membrane protein. Predicted acyltransferase/fused DNA polymerase [5'→3' polymerase/3'→5' exonuclease/5'→3' exonuclease  
*kdgT* → /2-keto-3-deoxy-D-gluconate transporter/6-N-hydroxylaminopurine resistance protein  
*hslV* → / peptidase component of the HslUV protease/essential cell division protein  
*metF* → 5,10-methylenetetrahydrofolate reductase  
*btuB* → vitamin B12/cobalamin outer membrane transporter  
*rpoB* → RNA polymerase, beta subunit  
*nudC* → NADH pyrophosphatase  
*yjaG* → conserved protein  
*pgj* → glucosylphosphate isomerase  
*nrfE* → heme lyase (NrfEG) for insertion of heme into c552. subunit NrfE  
*glpP* → / glutamate/aspartate:proton symporter/conserved protein  
*rpiR* ← DNA-binding transcriptional repressor  
*phnF* ← predicted DNA-binding transcriptional regulator of phosphonate uptake and biodegradation  
*adiA* ← arginine decarboxylase  
*rsqA* ← ribosome small subunit-dependent GTPase A  
*rsmB* → / 23S rRNA (Gm2251)-methyltransferase/conserved protein, DUF2170 family  
*yjfk* → conserved protein, DUF2491 family  
*mpi* → UDP-N-acetylmuramate-L-alanyl-gamma-D-glutamyl- meso-diaminopimelate ligase  
*nrpD* ← anaerobic ribonucleoside-triphosphate reductase  
*nrpD* ← anaerobic ribonucleoside-triphosphate reductase  
*treB* ← / fused trehalose(maltose)-specific PTS enzyme: IIB component/IIC component/DNA-binding transcriptional repressor  
*treB* ← / fused trehalose(maltose)-specific PTS enzyme: IIB component/IIC component/DNA-binding transcriptional repressor  
*treB* ← / fused trehalose(maltose)-specific PTS enzyme: IIB component/IIC component/DNA-binding transcriptional repressor  
*yjiI* ← predicted oxidoreductase with NAD(P)-binding Rossmann-fold domain  
*yjiN* → inner membrane protein, DUF898 family  
*yjiN* → inner membrane protein, DUF898 family  
*yjiR* ← conserved protein, DUF853 family with NTPase fold  
*insO* → pseudogene, IS911 transposase B:IS, phage, Tn; Transposon-related functions; extrachromosomal; transposon related  
*yjiC* ← predicted protein/RpoS stabilizer after DNA damage, anti-RssB factor  
*yjiP* ← inner membrane protein, H-NS-repressed, DUF1212 family/DNA-binding transcriptional regulator  
*leuP* ← tRNA-Leu  
*leuQ* ← tRNA-Leu  
*yjiV* → / predicted DNase/predicted pyruvate formate lyase activating enzyme  
*yjiV* → / predicted DNase/predicted pyruvate formate lyase activating enzyme  
*arcA* ← DNA-binding response regulator in two-component regulatory system with ArcB or CpxA
