# Supplementary material for: Chance and necessity in the genome evolution of endosymbiotic bacteria of insects
Source: PubMed Central journal article supplement (PMC5437351; doi:10.1038/ismej.2017.18), 2017-03-21
Supplement: ismej201718x7.pdf [file ismej201718x7.pdf]

Table S7. Fixed mutations in an *E. coli* evolving population under mild genetic drift effect

| Genome position | Mutation   | %individuals | Kind       | Gene               | Description                                                                                                                      |
|-----------------|------------|--------------|------------|--------------------|----------------------------------------------------------------------------------------------------------------------------------|
| 45,078          | C→T        | 100%         | A300V      | ( <i>CfixC</i> →   | predicted oxidoreductase with FAD/NAD(P)-binding domain                                                                          |
| 83,967          | C→T        | 100%         | S61L       | ( <i>Tcra</i> →    | DNA-binding transcriptional repressor-activator for carbon metabolism                                                            |
| 103,188         | +T         | 100%         | intergenic | ( <i>pxC</i> → /   | UDP-3-O-acyl N-acetylglucosamine deacetylase/regulator of secA translation                                                       |
| 302,914         | +C         | 100%         | coding     | (1 <i>yagX</i> ←   | predicted aromatic compound dioxygenase                                                                                          |
| 305,276         | G→A        | 100%         | S88L       | ( <i>TmatB</i> ←   | cryptic Mat fimbriin gene                                                                                                        |
| 518,073         | +T         | 100%         | intergenic | ( <i>ybbP</i> → /  | predicted ABC transporter permease/rhsD element protein                                                                          |
| 539,430         | A→G        | 100%         | S243S      | ( <i>AllC</i> ←    | allantoate amidohydrolase                                                                                                        |
| 539,932         | A→G        | 100%         | V76A       | ( <i>GallC</i> ←   | allantoate amidohydrolase                                                                                                        |
| 566,913         | T→C        | 100%         | R198R      | ( <i>ybcM</i> →    | DLP12 prophage, predicted DNA-binding transcriptional regulator                                                                  |
| 704,595         | A→G        | 100%         | T466A      | ( <i>chiP</i> →    | chitoporin, uptake of chitosugars                                                                                                |
| 919,281         | A→G        | 100%         | E170E      | ( <i>CmacB</i> →   | fused macrolide transporter subunits of ABC superfamily: ATP-binding component/membrane component                                |
| 980,270         | Δ1 bp      | 100%         | coding     | (7 <i>ycbB</i> ←   | murein L,D-transpeptidase                                                                                                        |
| 1,087,350       | Δ1 bp      | 100%         | coding     | (9 <i>pgaB</i> ←   | biofilm adhesin polysaccharide PGA export lipoprotein with a polysaccharide deacetylase activity needed for export               |
| 1,124,216       | A→G        | 100%         | Y77C       | ( <i>TrimJ</i> →   | ribosomal-protein-S5-alanine N- acetyltransferase                                                                                |
| 1,172,430       | Δ1 bp      | 100%         | intergenic | ( <i>mtf</i> ← / + | transcription-repair coupling factor/inner membrane protein                                                                      |
| 1,214,628       | G→A        | 100%         | D46N       | ( <i>CymgA</i> →   | connector protein for RcsB regulation of biofilm                                                                                 |
| 1,297,920       | IS5 (+) +Δ | 100%         | intergenic | ( <i>ychE</i> → /  | predicted inner membrane protein/oligopeptide transporter subunit                                                                |
| 1,377,956       | A→G        | 100%         | T195A      | ( <i>AycJ</i> →    | beta-phosphoglucomutase                                                                                                          |
| 1,400,464       | A→G        | 100%         | R6R        | ( <i>CGabgB</i> ←  | p-aminobenzoyl-glutamate hydrolase, B subunit                                                                                    |
| 1,517,957       | A→G        | 100%         | Q157R      | ( <i>CmcbR</i> →   | colanic acid and biofilm gene transcriptional regulator, MqsR-controlled                                                         |
| 1,537,360       | T→C        | 100%         | S819S      | ( <i>TnarZ</i> ←   | nitrate reductase 2 (NRZ), alpha subunit                                                                                         |
| 1,546,080       | A→G        | 100%         | N289S      | ( <i>AfdnG</i> →   | formate dehydrogenase-N, alpha subunit, nitrate- inducible                                                                       |
| 1,711,543       | Δ1 bp      | 100%         | intergenic | ( <i>dtpA</i> → /  | dipeptide and tripeptide permease A/glutathionine S-transferase                                                                  |
| 1,854,456       | +C         | 100%         | coding     | (5 <i>ydjI</i> ←   | predicted aldolase                                                                                                               |
| 1,933,749       | +A         | 100%         | intergenic | ( <i>zwf</i> ← / - | glucose-6-phosphate 1-dehydrogenase/predicted DNA-binding transcriptional regulator                                              |
| 2,106,695       | A→G        | 100%         | G38G       | ( <i>GrtbX</i> ←   | predicted polysoprenol-linked O-antigen transporter                                                                              |
| 2,661,742       | T→C        | 100%         | G43G       | ( <i>GyfhR</i> →   | S9 peptidase family protein, function unknown                                                                                    |
| 2,734,342       | IS1 (+) +Δ | 100%         | intergenic | ( <i>bamD</i> →    | lipoprotein required for OM biogenesis, in BamABCDE complex/cold shock protein associated with 30S ribosomal subunit             |
| 3,004,979       | T→C        | 100%         | I91I       | ( <i>ATIhyuA</i> → | D-stereospecific phenylhydantoinase                                                                                              |
| 3,316,099       | T→C        | 100%         | A65A       | ( <i>GcyhbX</i> ←  | predicted hydrolase, inner membrane                                                                                              |
| 3,349,579       | T→C        | 100%         | L59L       | ( <i>Ti,gttB</i> → | glutamate synthase, large subunit                                                                                                |
| 3,543,623       | C→T        | 100%         | A376A      | ( <i>CmalQ</i> ←   | 4-alpha-glucanotransferase (amylomaltase)                                                                                        |
| 3,685,449       | T→C        | 100%         | D613G      | ( <i>CbcsB</i> ←   | regulator of cellulose synthase, cyclic di-GMP binding                                                                           |
| 3,793,369       | T→C        | 100%         | T208A      | ( <i>WasU</i> ←    | lipopolysaccharide core biosynthesis                                                                                             |
| 4,037,965       | A→G        | 100%         | intergenic | ( <i>yihG</i> ← /  | inner membrane protein, Predicted acyltransferase/fused DNA polymerase I 5'->3' polymerase/3'->5' exonuclease/5'->3' exonuclease |
| 4,094,124       | A→G        | 100%         | intergenic | ( <i>kdgT</i> → /  | 2-keto-3-deoxy-D-gluconate transporter/6-N-hydroxylaminopurine resistance protein                                                |
| 4,287,686       | +CG        | 100%         | intergenic | ( <i>gltP</i> → /  | glutamate/aspartate:proton symporter/conserved protein                                                                           |
| 4,471,270       | +T         | 100%         | pseudogene | ( <i>yjgN</i> →    | inner membrane protein, DUF898 family                                                                                            |
| 4,500,691       | G→A        | 100%         | pseudogene | ( <i>insO</i> →    | pseudogene, IS911 transposase B;IS, phage, Tn; Transposon-related functions; extrachromosomal; transposon related                |
