# Supplementary material for: Chance and necessity in the genome evolution of endosymbiotic bacteria of insects
Source: ISME J. 2017 Mar 21;11(6):1291–304. doi: 10.1038/ismej.2017.18 (PMC5437351; doi:10.1038/ismej.2017.18)
Supplement: Supplementary Table S8 [file ismej201718x8.pdf]

|      |            |            |            |            |    |             |            |            |            |    |            |            |            |            |    |
|------|------------|------------|------------|------------|----|-------------|------------|------------|------------|----|------------|------------|------------|------------|----|
| uup  | 0.38319023 | -1.3838673 | 3.70E-05   | 0.00011387 | -1 | 0.58705215  | -0.7684394 | 0.05532296 | 0.09366749 | 0  | 1.53201229 | 0.61542788 | 0.11010094 | 0.49166233 | 0  |
| pqiA | 0.94961714 | -0.0745821 | 0.74752044 | 0.79503919 | 0  | 1.06027841  | 0.08444314 | 0.90574019 | 0.92821566 | 0  | 1.11653251 | 0.15902525 | 0.72202058 | 0.95399541 | 0  |
| pqiB | 0.59675221 | -0.7447961 | 0.01747518 | 0.02953994 | 0  | 0.48100379  | -1.0558798 | 0.01591731 | 0.03152783 | -1 | 0.80603604 | -0.3110837 | 0.56900251 | 0.92799596 | 0  |
| pqiC | 0.72624001 | -0.4614817 | 0.22873275 | 0.29098864 | 0  | 0.45514599  | -1.1355987 | 0.01330867 | 0.02687889 | -1 | 0.62671566 | -0.6741171 | 0.11605359 | 0.50522834 | 0  |
| rmf  | 3.29422015 | 1.71993697 | 0.02897617 | 0.04650717 | 1  | 1.11323428  | 0.15475724 | 0.6081683  | 0.68769082 | 0  | 0.3379356  | -1.5651797 | 0.02097986 | 0.16146806 | 0  |
| fabA | 0.25749894 | -1.9573616 | 9.34E-10   | 5.68E-09   | -1 | 0.23173438  | -2.109456  | 4.93E-07   | 3.09E-06   | -1 | 0.89994303 | -0.1520944 | 1          | 1          | 0  |
| ycbZ | 0.43580015 | -1.1982614 | 0.00025162 | 0.00064205 | -1 | 0.74773735  | -0.4193965 | 0.10443584 | 0.16227215 | 0  | 1.7157804  | 0.77886492 | 0.12951831 | 0.53863917 | 0  |
| secA | 0.48816047 | -1.0345726 | 0.00039091 | 0.00095342 | -1 | 0.48663498  | -1.0390881 | 0.00222939 | 0.00559436 | -1 | 0.99687503 | -0.0045154 | 0.82962738 | 0.97877388 | 0  |
| matP | 0.26372084 | -1.9229165 | 6.95E-07   | 2.87E-06   | -1 | 0.27418811  | -1.8667621 | 2.62E-06   | 1.41E-05   | -1 | 1.03969071 | 0.05615441 | 0.50094046 | 0.90598897 | 0  |
| ompA | 0.20213859 | -2.3065833 | 8.20E-14   | 7.50E-13   | -1 | 0.12191774  | -3.0360201 | 2.57E-15   | 6.38E-14   | -1 | 0.60313934 | -0.7294368 | 0.02490395 | 0.18403694 | 0  |
| sulA | 0.60151771 | -0.7333209 | 0.01867656 | 0.03124786 | 0  | 0.89303603  | -0.1632097 | 0.39255484 | 0.48333793 | 0  | 1.48463796 | 0.57011117 | 0.27337631 | 0.77568242 | 0  |
| sky  | 0.61509    | -0.7011306 | 0.11748589 | 0.1612328  | 0  | 0.56635472  | -0.8202222 | 0.05554066 | 0.09392812 | 0  | 0.92076723 | -0.1190916 | 0.55559553 | 0.92146532 | 0  |
| yccS | 1.77261131 | 0.82587623 | 0.04521517 | 0.06966007 | 0  | 2.42809199  | 1.27982308 | 0.02801252 | 0.05190245 | 0  | 1.36978252 | 0.45394685 | 0.54824972 | 0.91919682 | 0  |
| yccF | 1.88853285 | 0.91726588 | 0.1208669  | 0.16533573 | 0  | 1.4493241   | 0.53538025 | 0.28756876 | 0.377082   | 0  | 0.76743388 | -0.3818856 | 0.68730511 | 0.94389281 | 0  |
| helD | 0.71975255 | -0.4744271 | 0.12969531 | 0.17632016 | 0  | 0.55022936  | -0.861895  | 0.02687927 | 0.05005458 | 0  | 0.76447017 | -0.3874679 | 0.30385021 | 0.80892599 | 0  |
| mgsA | 0.04179693 | -4.5804592 | 1.49E-38   | 8.78E-37   | -1 | 0.0696699   | -3.8433207 | 2.87E-21   | 1.72E-19   | -1 | 1.66686639 | 0.73713847 | 0.07914752 | 0.39708826 | 0  |
| yccT | 2.11563819 | 1.08109292 | 0.04109872 | 0.06396513 | 0  | 2.35855372  | 1.23790246 | 0.05728986 | 0.09655374 | 0  | 1.11481903 | 0.15680954 | 0.88008435 | 0.99065677 | 0  |
| yccU | 1.16633895 | 0.22198712 | 0.70089463 | 0.75160271 | 0  | 0.46205945  | -1.1138496 | 0.00473834 | 0.0108547  | -1 | 0.39616224 | -1.3358367 | 0.00103392 | 0.01701339 | -1 |
| mutT | 1.10524648 | 0.14436814 | 0.9556149  | 0.96887978 | 0  | 1.25737133  | 0.33041077 | 0.38159611 | 0.47287527 | 0  | 1.13763885 | 0.18604263 | 0.42846639 | 0.87784805 | 0  |
| hspQ | 0.97492457 | -0.0366375 | 0.74993721 | 0.79708401 | 0  | 0.84996182  | -0.2345301 | 0.22517142 | 0.30920835 | 0  | 0.87182316 | -0.1978926 | 0.30589194 | 0.81005169 | 0  |
| rlmI | 0.60188314 | -0.7324447 | 0.06100686 | 0.09033433 | 0  | 1.01637084  | 0.02342689 | 0.85360424 | 0.88943106 | 0  | 1.68865146 | 0.75587159 | 0.0632404  | 0.34388428 | 0  |
| yccX | 0.94791269 | -0.0771739 | 0.78543814 | 0.82700364 | 0  | 0.58981027  | -0.7616771 | 0.36877287 | 0.45982148 | 0  | 0.62222004 | -0.6845032 | 0.43633511 | 0.88087171 | 0  |
| tusE | 0.52436919 | -0.9313452 | 0.04475412 | 0.06899789 | 0  | 0.42804497  | -1.2241657 | 0.02893634 | 0.05341257 | 0  | 0.81630458 | -0.2928205 | 0.52273408 | 0.91269012 | 0  |
| yccA | 0.55957914 | -0.8375859 | 0.00581153 | 0.0109232  | 0  | 0.28450586  | -1.8134697 | 1.19E-06   | 6.91E-06   | -1 | 0.50842829 | -0.9758838 | 0.00439355 | 0.04955387 | 0  |
| serT | 2.30086349 | 1.20217539 | 0.41751918 | 0.49047399 | 0  | 4.93376662  | 2.30268947 | 0.09944605 | 0.15594467 | 0  | 2.14431088 | 1.10051408 | 0.34766507 | 0.84560166 | 0  |
| hyaA | 3.79465449 | 1.92396853 | 0.01961975 | 0.0326774  | 1  | 5.62854954  | 2.49276319 | 0.00435017 | 0.01005409 | 1  | 1.4832838  | 0.56879466 | 0.37723721 | 0.85988523 | 0  |
| hyaB | 6.57066695 | 2.71603982 | 2.44E-08   | 1.23E-07   | 1  | 6.60123683  | 2.72273636 | 2.96E-07   | 1.96E-06   | 1  | 1.00465248 | 0.00669654 | 0.76660801 | 0.96109492 | 0  |
| hyaC | 5.67433478 | 2.50445127 | 8.57E-07   | 3.50E-06   | 1  | 6.14761261  | 2.62002626 | 1.05E-05   | 4.91E-05   | 1  | 1.08340675 | 0.11557499 | 0.79596448 | 0.96646568 | 0  |
| hyaD | 4.18105987 | 2.0638687  | 2.23E-05   | 7.11E-05   | 1  | 3.42594254  | 1.77650096 | 0.00037177 | 0.00113615 | 1  | 0.81939572 | -0.2873677 | 0.90416976 | 0.99884485 | 0  |
| yacG | 0.29924502 | -1.7406009 | 0.0006888  | 0.00159791 | -1 | 0.413889236 | -1.2726725 | 0.03552591 | 0.06418193 | 0  | 1.38312196 | 0.46792838 | 0.45388537 | 0.88755478 | 0  |
| hyaE | 2.67813063 | 1.42122633 | 0.02285252 | 0.03757989 | 1  | 3.7393441   | 1.90278523 | 0.01343391 | 0.02706998 | 1  | 1.39625157 | 0.4815589  | 0.51217379 | 0.90925684 | 0  |
| hyaF | 4.50488622 | 2.17149067 | 0.00041954 | 0.00101429 | 1  | 4.90776149  | 2.29506514 | 0.00015066 | 0.00051696 | 1  | 1.08943073 | 0.12357447 | 0.50703286 | 0.90925684 | 0  |
| cbdA | 4.70490004 | 2.23416407 | 5.91E-08   | 2.82E-07   | 1  | 5.42818873  | 2.44047088 | 1.13E-07   | 8.24E-07   | 1  | 1.15373094 | 0.20630681 | 0.48591864 | 0.90075713 | 0  |
| cbdB | 3.12649237 | 1.644545   | 2.15E-05   | 6.90E-05   | 1  | 3.54945834  | 1.82759888 | 5.92E-05   | 0.00022491 | 1  | 1.1352845  | 0.18305388 | 0.62314342 | 0.92989404 | 0  |
| cbdX | 2.02322449 | 1.0166564  | 0.5657867  | 0.63108077 | 0  | 1.1413919   | 0.19079422 | 0.60405184 | 0.6844372  | 0  | 0.56414496 | -0.8258622 | 0.85068782 | 0.98212032 | 0  |
| appA | 1.95797672 | 0.96936361 | 0.02592619 | 0.04213244 | 0  | 1.9565189   | 0.96828905 | 0.01110215 | 0.02304388 | 0  | 0.99925545 | -0.0010746 | 0.58109496 | 0.92806272 | 0  |
| etk  | 1.16463255 | 0.21987484 | 0.59061692 | 0.65349573 | 0  | 1.02886609  | 0.04105522 | 0.51255001 | 0.59983011 | 0  | 0.8834255  | -0.1788196 | 0.88524278 | 0.99348376 | 0  |
| etp  | 1.54248723 | 0.62525855 | 0.65986986 | 0.71542591 | 0  | 0.55673558  | -0.8449358 | 0.9370257  | 0.95562348 | 0  | 0.36093367 | -1.4701944 | 0.56848919 | 0.92771214 | 0  |
| gfcE | 4.05460635 | 2.01956185 | 0.00344512 | 0.00682687 | 1  | 3.67258978  | 1.87679776 | 0.01696213 | 0.03334326 | 1  | 0.90578208 | -0.1427641 | 0.95488544 | 1          | 0  |
| gfcD | 5.01669206 | 2.32673638 | 2.69E-07   | 1.17E-06   | 1  | 5.24901595  | 2.39204698 | 1.97E-06   | 1.09E-05   | 1  | 1.04631018 | 0.0653106  | 0.71389617 | 0.95223057 | 0  |
